# Supplementary material for: Facial Synthesis and Bioevaluation of Well-Defined OEGylated Betulinic Acid-Cyclodextrin Conjugates for Inhibition of Influenza Infection
Source: MDPI journal article supplement (doi:10.3390/molecules27041163), 2022-02-09

## Supporting Information

### Facial Synthesis and Bioevaluation of Well-Defined OEGylated Betulinic Acid-Cyclodextrin Conjugates for Inhibition of Influenza Entry

Yingying Chen,<sup>1,†</sup> Xinchun Wang,<sup>1,†</sup> Xinyuan Ma,<sup>1</sup> Shuobin Liang,<sup>1</sup> Qianqian Gao,<sup>1</sup>  
Elena V. Tretyakova,<sup>3</sup> Yongmin Zhang,<sup>4</sup> Demin Zhou,<sup>1,2</sup> Sulong Xiao<sup>1,\*</sup>

<sup>1</sup>State Key Laboratory of Natural and Biomimetic Drugs, School of Pharmaceutical Sciences, Peking University, Beijing 100191, China

<sup>2</sup>Institute of Chemical Biology, Shenzhen Bay Laboratories, Shenzhen 518132, China

<sup>3</sup>Ufa Institute of Chemistry of the Ufa Federal Research Centre of the Russian Academy of Sciences, 71 Prospect Oktyabrya, 450054, Ufa, Russian Federation

<sup>4</sup>Sorbonne Université, CNRS, Institut Parisien de Chimie Moléculaire, UMR 8232, 4 place Jussieu, 75005 Paris, France

1. **Figure S1.** Cytotoxicity of multivalent BA-CD conjugates to MDCK cells S4
2. **Figure S2.** Binding sensorgrams for conjugates **81** and **83** interaction with influenza HA protein. S4
3. Selected NMR, HRMS and HRMS or MALDI-TOF MS spectra S5

| Spectra                                   | Page |
|-------------------------------------------|------|
| <sup>1</sup> H NMR of compound <b>34</b>  | S5   |
| <sup>13</sup> C NMR of compound <b>34</b> | S5   |
| HRMS of compound <b>34</b>                | S6   |
| <sup>1</sup> H NMR of compound <b>35</b>  | S6   |
| <sup>13</sup> C NMR of compound <b>35</b> | S7   |
| HRMS of compound <b>35</b>                | S7   |
| <sup>1</sup> H NMR of compound <b>36</b>  | S8   |
| <sup>13</sup> C NMR of compound <b>36</b> | S8   |

|                                           |     |
|-------------------------------------------|-----|
| HRMS of compound <b>36</b>                | S9  |
| <sup>1</sup> H NMR of compound <b>37</b>  | S9  |
| <sup>13</sup> C NMR of compound <b>37</b> | S10 |
| HRMS of compound <b>37</b>                | S10 |
| <sup>1</sup> H NMR of compound <b>38</b>  | S11 |
| <sup>13</sup> C NMR of compound <b>38</b> | S11 |
| HRMS of compound <b>38</b>                | S12 |
| <sup>1</sup> H NMR of compound <b>51</b>  | S12 |
| <sup>13</sup> C NMR of compound <b>51</b> | S13 |

|                                           |     |
|-------------------------------------------|-----|
| MALDI-TOF of compound <b>51</b>           | S13 |
| <sup>1</sup> H NMR of compound <b>52</b>  | S14 |
| <sup>13</sup> C NMR of compound <b>52</b> | S14 |
| MALDI-TOF of compound <b>52</b>           | S15 |
| <sup>1</sup> H NMR of compound <b>53</b>  | S15 |
| <sup>13</sup> C NMR of compound <b>53</b> | S16 |
| MALDI-TOF of compound <b>53</b>           | S16 |
| <sup>1</sup> H NMR of compound <b>54</b>  | S17 |
| <sup>13</sup> C NMR of compound <b>54</b> | S17 |
| MALDI-TOF of compound <b>54</b>           | S18 |
| <sup>1</sup> H NMR of compound <b>55</b>  | S18 |
| <sup>13</sup> C NMR of compound <b>55</b> | S19 |
| MALDI-TOF of compound <b>55</b>           | S19 |
| <sup>1</sup> H NMR of compound <b>56</b>  | S20 |
| <sup>13</sup> C NMR of compound <b>56</b> | S20 |
| MALDI-TOF of compound <b>56</b>           | S21 |
| <sup>1</sup> H NMR of compound <b>57</b>  | S21 |
| <sup>13</sup> C NMR of compound <b>57</b> | S22 |
| MALDI-TOF of compound <b>57</b>           | S22 |
| <sup>1</sup> H NMR of compound <b>58</b>  | S23 |
| <sup>13</sup> C NMR of compound <b>58</b> | S23 |
| MALDI-TOF of compound <b>58</b>           | S24 |
| <sup>1</sup> H NMR of compound <b>59</b>  | S24 |
| <sup>13</sup> C NMR of compound <b>59</b> | S25 |
| MALDI-TOF of compound <b>59</b>           | S25 |
| <sup>1</sup> H NMR of compound <b>60</b>  | S26 |
| <sup>13</sup> C NMR of compound <b>60</b> | S26 |
| MALDI-TOF of compound <b>60</b>           | S27 |

|                                           |     |
|-------------------------------------------|-----|
| <sup>1</sup> H NMR of compound <b>61</b>  | S27 |
| <sup>13</sup> C NMR of compound <b>61</b> | S28 |
| MALDI-TOF of compound <b>61</b>           | S28 |
| <sup>1</sup> H NMR of compound <b>62</b>  | S29 |
| <sup>13</sup> C NMR of compound <b>62</b> | S29 |
| MALDI-TOF of compound <b>62</b>           | S30 |
| <sup>1</sup> H NMR of compound <b>63</b>  | S30 |
| <sup>13</sup> C NMR of compound <b>63</b> | S45 |
| MALDI-TOF of compound <b>63</b>           | S31 |
| <sup>1</sup> H NMR of compound <b>64</b>  | S32 |
| <sup>13</sup> C NMR of compound <b>64</b> | S32 |
| MALDI-TOF of compound <b>64</b>           | S33 |
| <sup>1</sup> H NMR of compound <b>65</b>  | S33 |
| <sup>13</sup> C NMR of compound <b>65</b> | S34 |
| MALDI-TOF of compound <b>65</b>           | S34 |
| <sup>1</sup> H NMR of compound <b>66</b>  | S35 |
| <sup>13</sup> C NMR of compound <b>66</b> | S35 |
| MALDI-TOF of compound <b>66</b>           | S36 |
| <sup>1</sup> H NMR of compound <b>67</b>  | S36 |
| <sup>13</sup> C NMR of compound <b>67</b> | S37 |
| MALDI-TOF of compound <b>67</b>           | S37 |
| <sup>1</sup> H NMR of compound <b>68</b>  | S38 |
| <sup>13</sup> C NMR of compound <b>68</b> | S38 |
| MALDI-TOF of compound <b>68</b>           | S39 |
| <sup>1</sup> H NMR of compound <b>69</b>  | S39 |
| <sup>13</sup> C NMR of compound <b>69</b> | S40 |
| MALDI-TOF of compound <b>69</b>           | S40 |
| <sup>1</sup> H NMR of compound <b>70</b>  | S41 |

|                                           |     |
|-------------------------------------------|-----|
| <sup>13</sup> C NMR of compound <b>70</b> | S41 |
| MALDI-TOF of compound <b>70</b>           | S42 |
| <sup>1</sup> H NMR of compound <b>71</b>  | S42 |
| <sup>13</sup> C NMR of compound <b>71</b> | S43 |
| MALDI-TOF of compound <b>71</b>           | S43 |
| <sup>1</sup> H NMR of compound <b>72</b>  | S44 |
| <sup>13</sup> C NMR of compound <b>72</b> | S44 |
| MALDI-TOF of compound <b>72</b>           | S59 |
| <sup>1</sup> H NMR of compound <b>73</b>  | S45 |
| <sup>13</sup> C NMR of compound <b>73</b> | S46 |
| MALDI-TOF of compound <b>73</b>           | S46 |
| <sup>1</sup> H NMR of compound <b>74</b>  | S47 |
| <sup>13</sup> C NMR of compound <b>74</b> | S47 |
| MALDI-TOF of compound <b>74</b>           | S48 |
| <sup>1</sup> H NMR of compound <b>75</b>  | S48 |
| <sup>13</sup> C NMR of compound <b>75</b> | S49 |
| MALDI-TOF of compound <b>75</b>           | S49 |
| <sup>1</sup> H NMR of compound <b>76</b>  | S50 |
| <sup>13</sup> C NMR of compound <b>76</b> | S50 |
| MALDI-TOF of compound <b>76</b>           | S51 |
| <sup>1</sup> H NMR of compound <b>77</b>  | S51 |
| <sup>13</sup> C NMR of compound <b>77</b> | S52 |
| MALDI-TOF of compound <b>77</b>           | S52 |
| <sup>1</sup> H NMR of compound <b>78</b>  | S53 |
| <sup>13</sup> C NMR of compound <b>78</b> | S53 |
| MALDI-TOF of compound <b>78</b>           | S54 |

|                                           |     |
|-------------------------------------------|-----|
| <sup>1</sup> H NMR of compound <b>79</b>  | S54 |
| <sup>13</sup> C NMR of compound <b>79</b> | S55 |
| MALDI-TOF of compound <b>79</b>           | S55 |
| <sup>1</sup> H NMR of compound <b>80</b>  | S56 |
| <sup>13</sup> C NMR of compound <b>80</b> | S56 |
| MALDI-TOF of compound <b>80</b>           | S57 |
| <sup>1</sup> H NMR of compound <b>81</b>  | S57 |
| <sup>13</sup> C NMR of compound <b>81</b> | S58 |
| MALDI-TOF of compound <b>81</b>           | S58 |
| <sup>1</sup> H NMR of compound <b>82</b>  | S59 |
| <sup>13</sup> C NMR of compound <b>82</b> | S59 |
| MALDI-TOF of compound <b>82</b>           | S60 |
| <sup>1</sup> H NMR of compound <b>83</b>  | S60 |
| <sup>13</sup> C NMR of compound <b>83</b> | S61 |
| MALDI-TOF of compound <b>83</b>           | S61 |
| <sup>1</sup> H NMR of compound <b>84</b>  | S62 |
| <sup>13</sup> C NMR of compound <b>84</b> | S62 |
| MALDI-TOF of compound <b>84</b>           | S63 |
| <sup>1</sup> H NMR of compound <b>85</b>  | S63 |
| <sup>13</sup> C NMR of compound <b>85</b> | S64 |
| MALDI-TOF of compound <b>85</b>           | S64 |
| <sup>1</sup> H NMR of compound <b>86</b>  | S65 |
| <sup>13</sup> C NMR of compound <b>86</b> | S65 |
| MALDI-TOF of compound <b>86</b>           | S66 |

## 1. Figure S1.

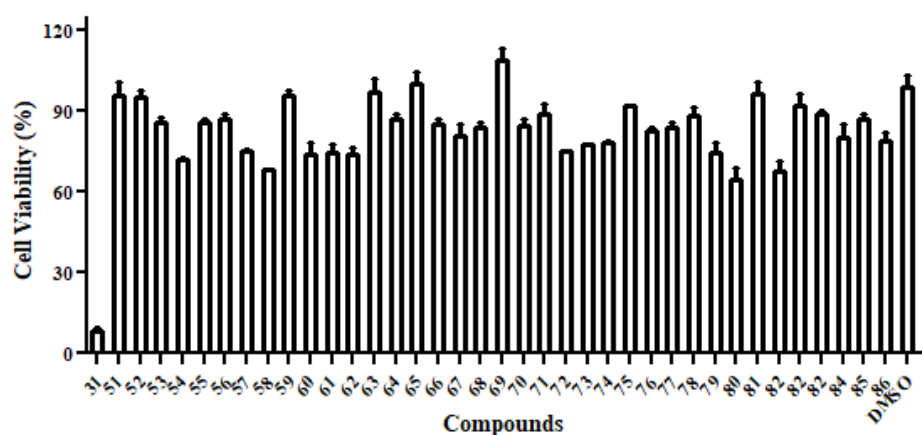

**Figure S1.** Cytotoxicity of multivalent BA-CD conjugates to MDCK cells. The cell viability of MDCK cells was analyzed at 36 h of incubation in the presence of BA (**31**) and its CD conjugates **51-86** at concentration of 100  $\mu\text{M}$ . The CellTiter-Glo Luminescent cell viability assay kit was used. 1% DMSO acted as negative control. Error bars indicate the mean  $\pm$  SD of three independent experiments.

## 2. Figure S2.

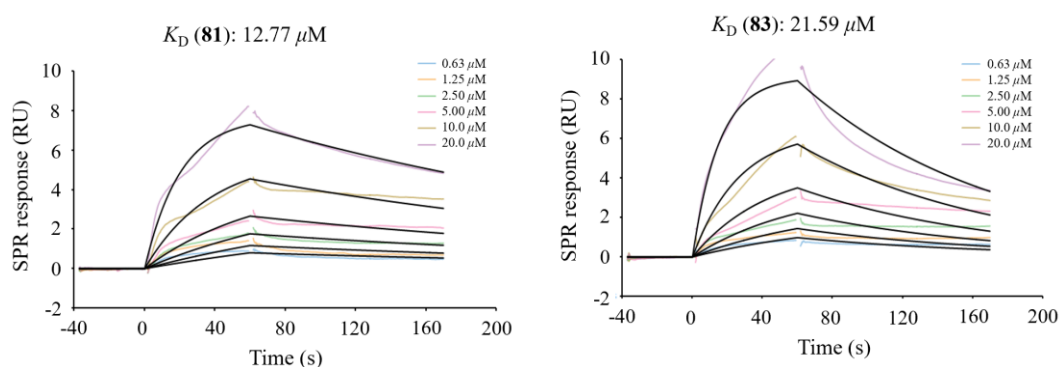

**Figure S2.** Binding sensorgrams for conjugates **81** and **83** interaction with influenza HA protein. The HA protein was immobilized on a CM5 sensor chip by the standard amine-coupling procedure. Different concentrations of conjugates **81** and **83** were flowed over the chip surface for a contact time of 60 s and a dissociation time of 180 s, respectively.  $K_D$  values were labeled in the graphs.

### 3. Selected NMR, HRMS and MALDI-TOF spectra

#### $^1\text{H}$ NMR of compound **34**

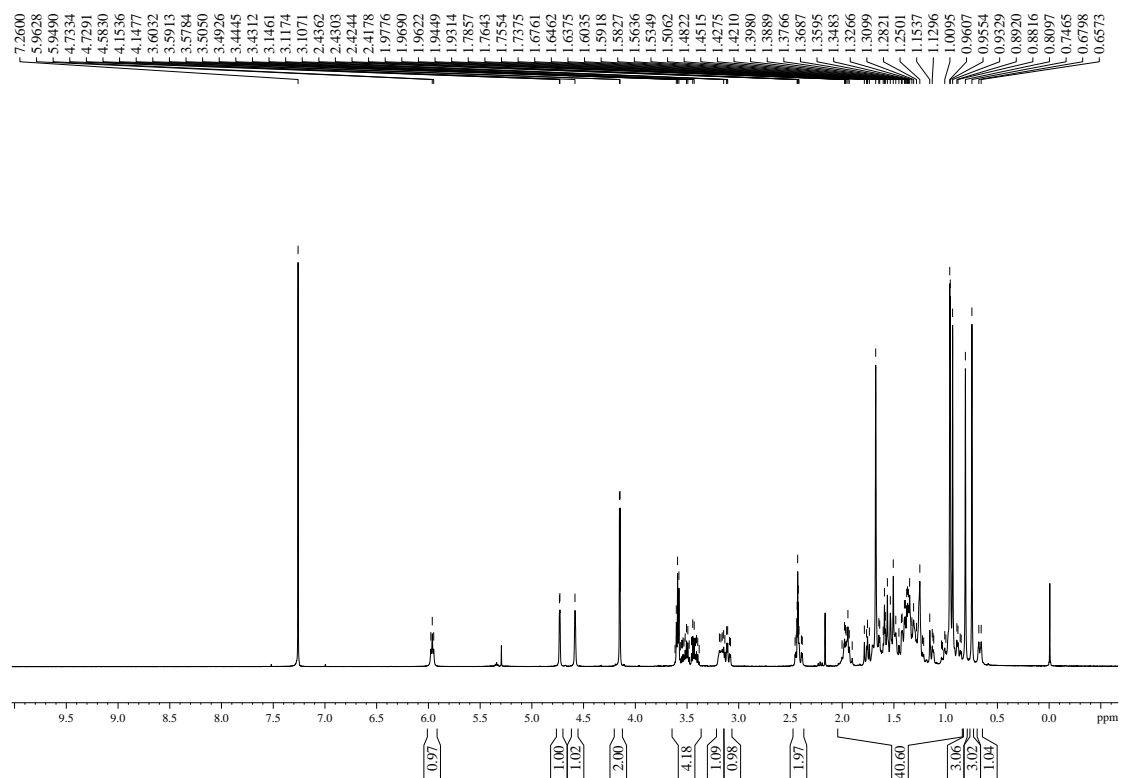

#### $^{13}\text{C}$ NMR of compound **34**

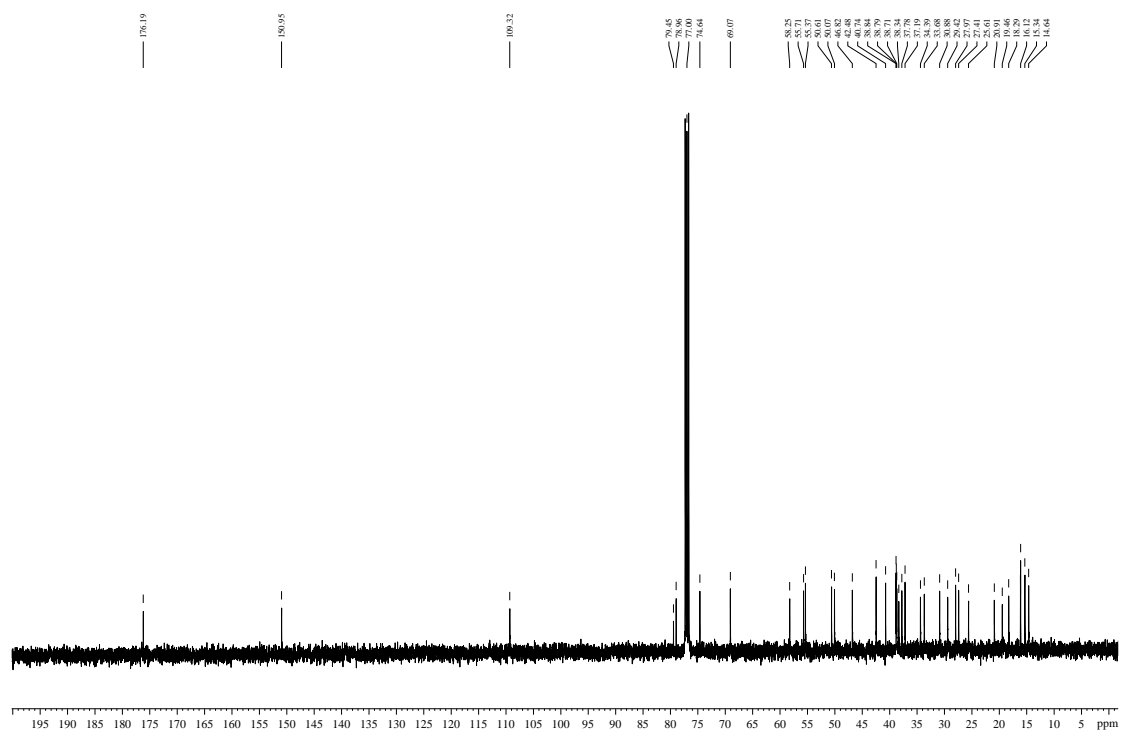

# HRMS of compound **34**

CYY-3-39 #519 RT: 5.09 AV: 1 NL: 7.58E9  
T: FTMS + p ESI Full ms [150.0000-2000.0000]

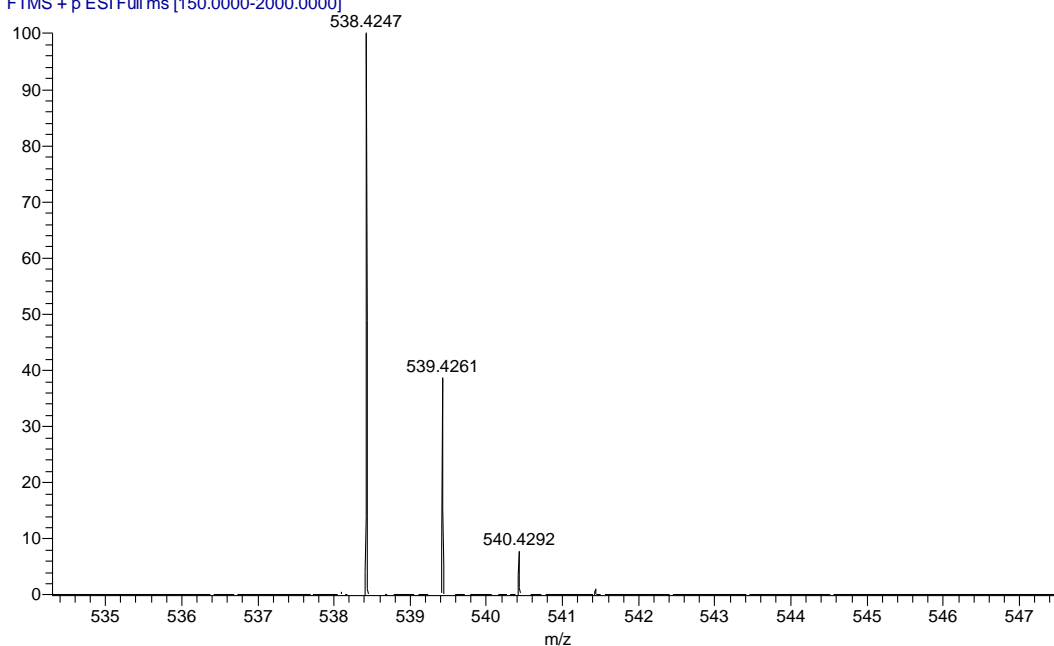

# $^1\text{H}$ NMR of compound **35**

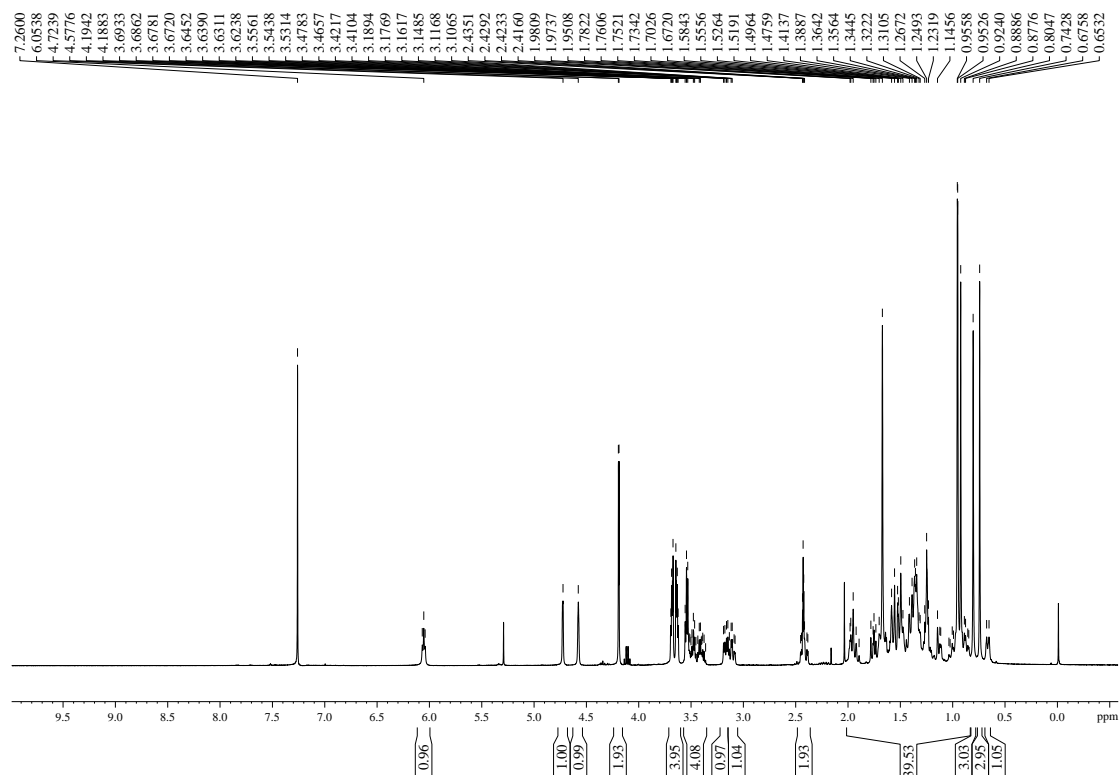

### $^{13}\text{C}$ NMR of compound **35**

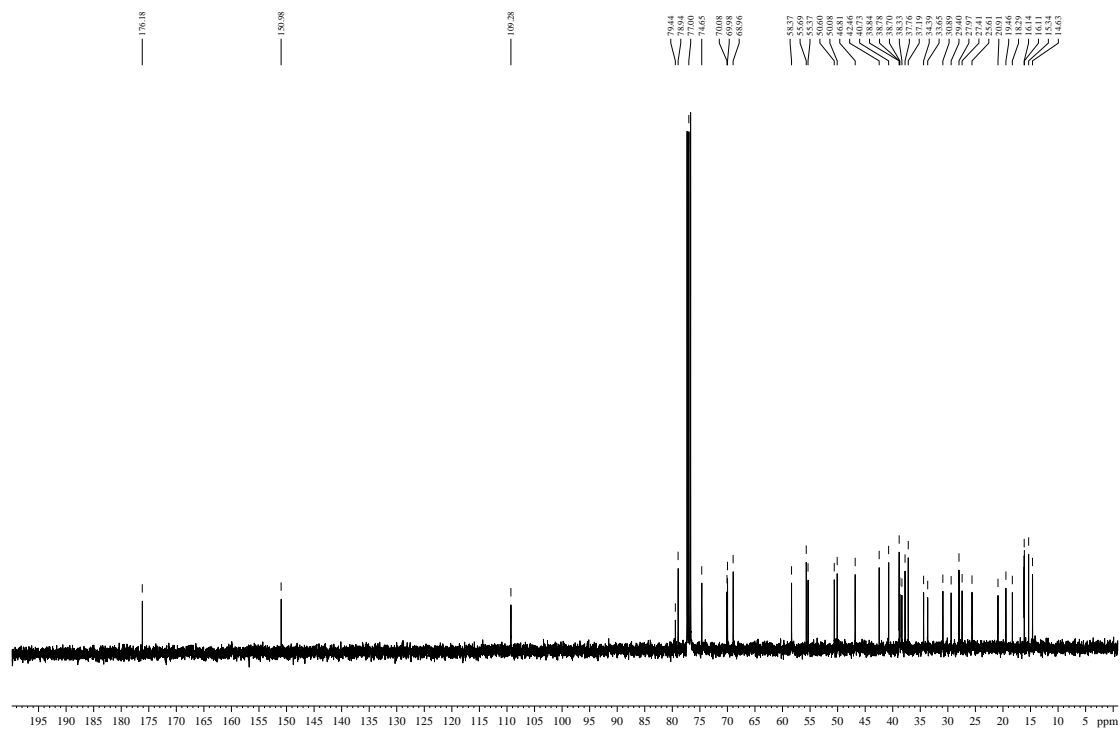

### HRMS of compound **35**

CYY-3-45 #505 RT: 4.95 AV: 1 NL: 5.77E9  
T: FTMS + p ESI Full ms [150.0000-2000.0000]

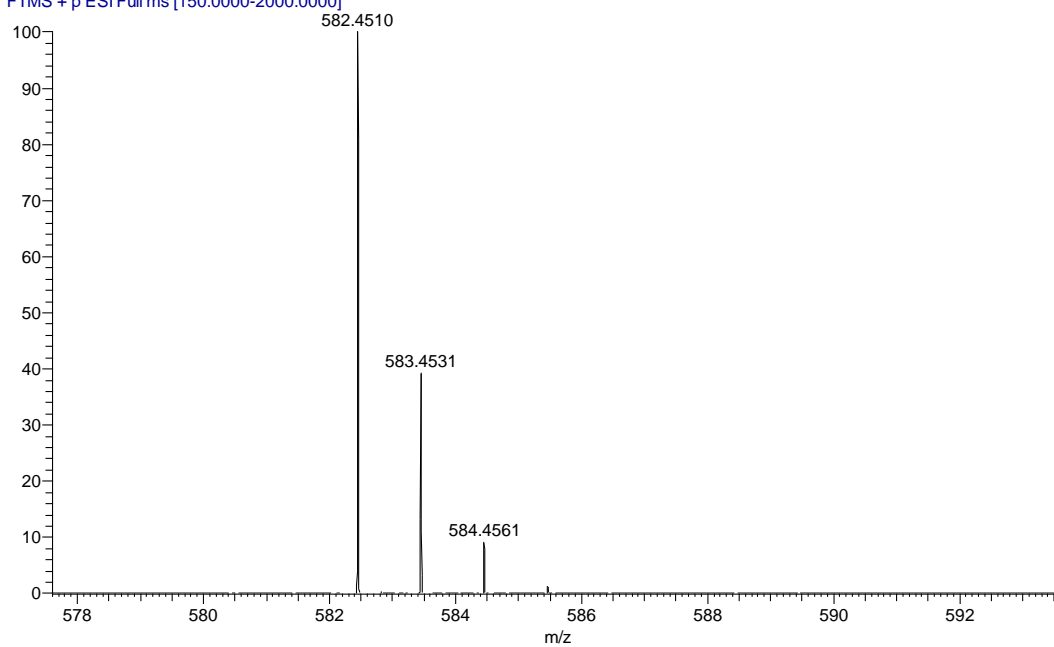

# <sup>1</sup>H NMR of compound **36**

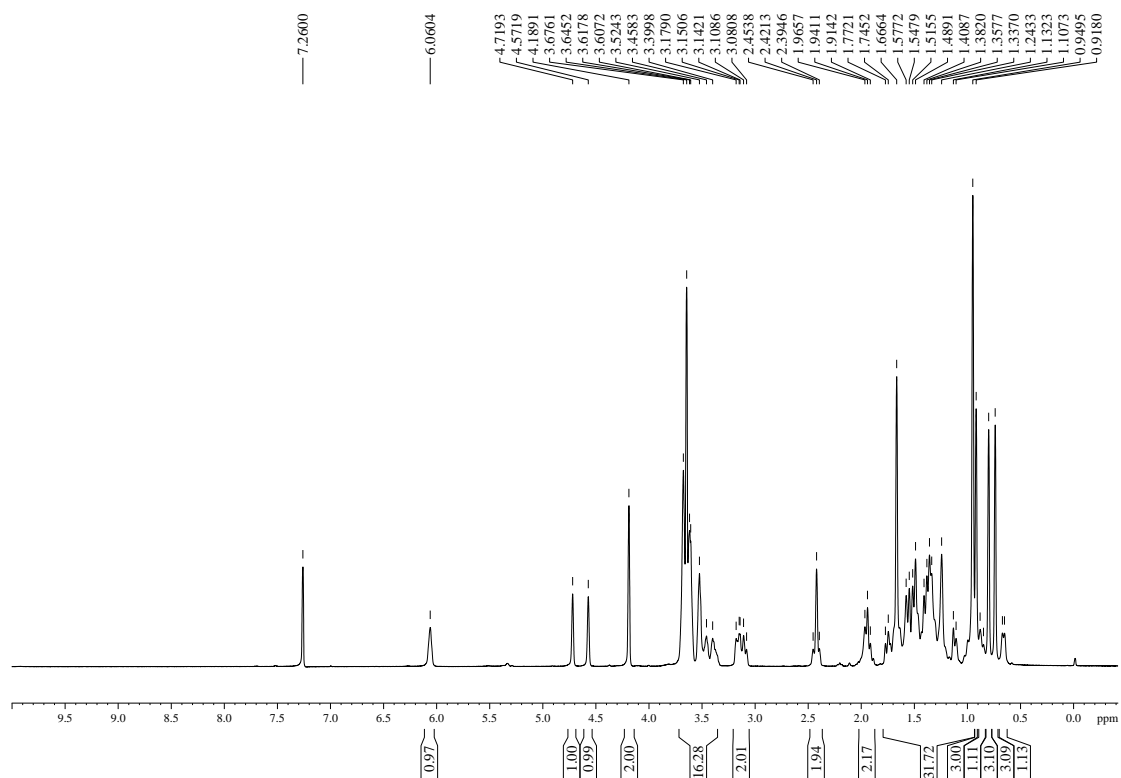

# <sup>13</sup>C NMR of compound **36**

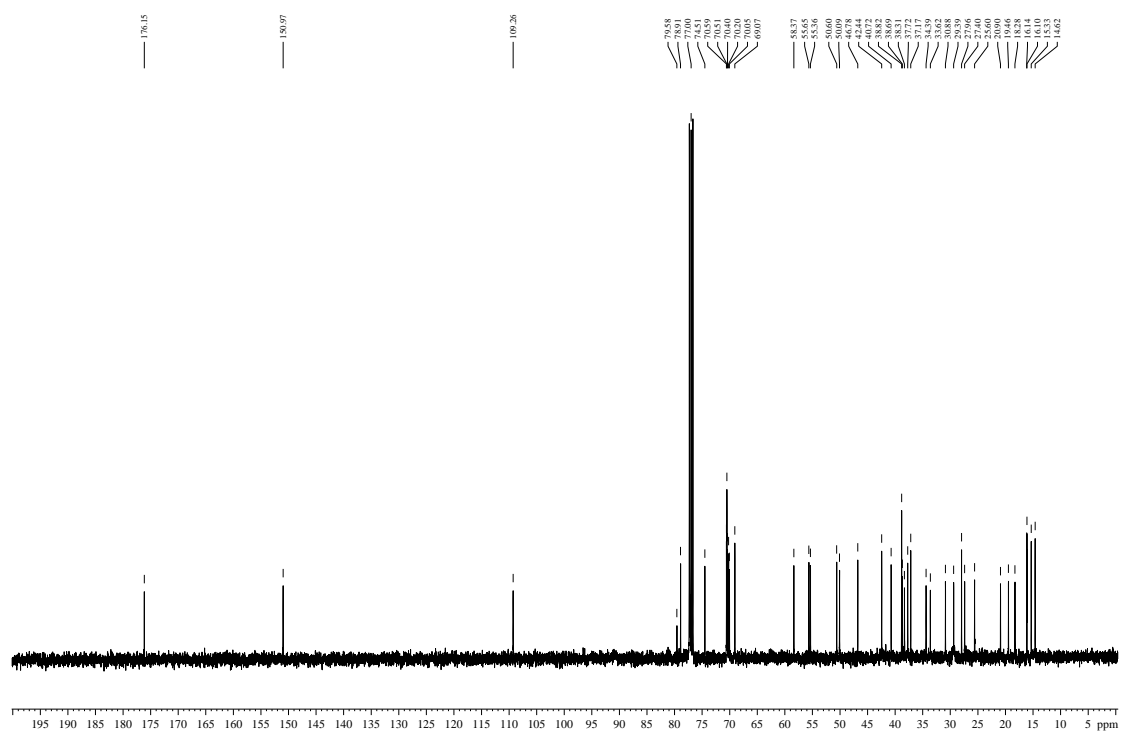

## HRMS of compound **36**

### Peking University Mass Spectrometry Sample Analysis Report

#### Analysis Info

Analysis Name FTMS-19080136\_Pos\_20190826\_000003.d  
Sample CYY-1-96  
Comment

Acquisition Date 8/26/2019 1:25:39 PM  
Instrument Bruker Solarix XR FTMS  
Operator Peking University

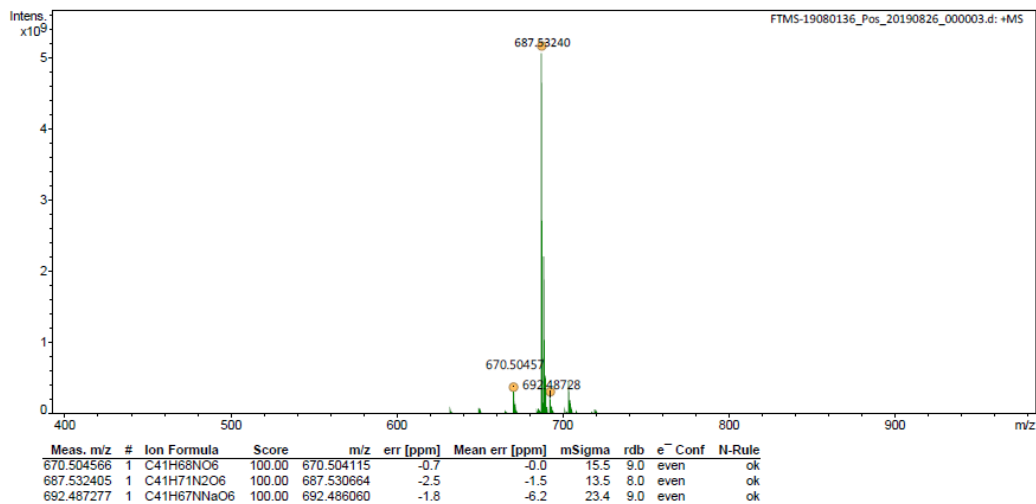

## <sup>1</sup>H NMR of compound **37**

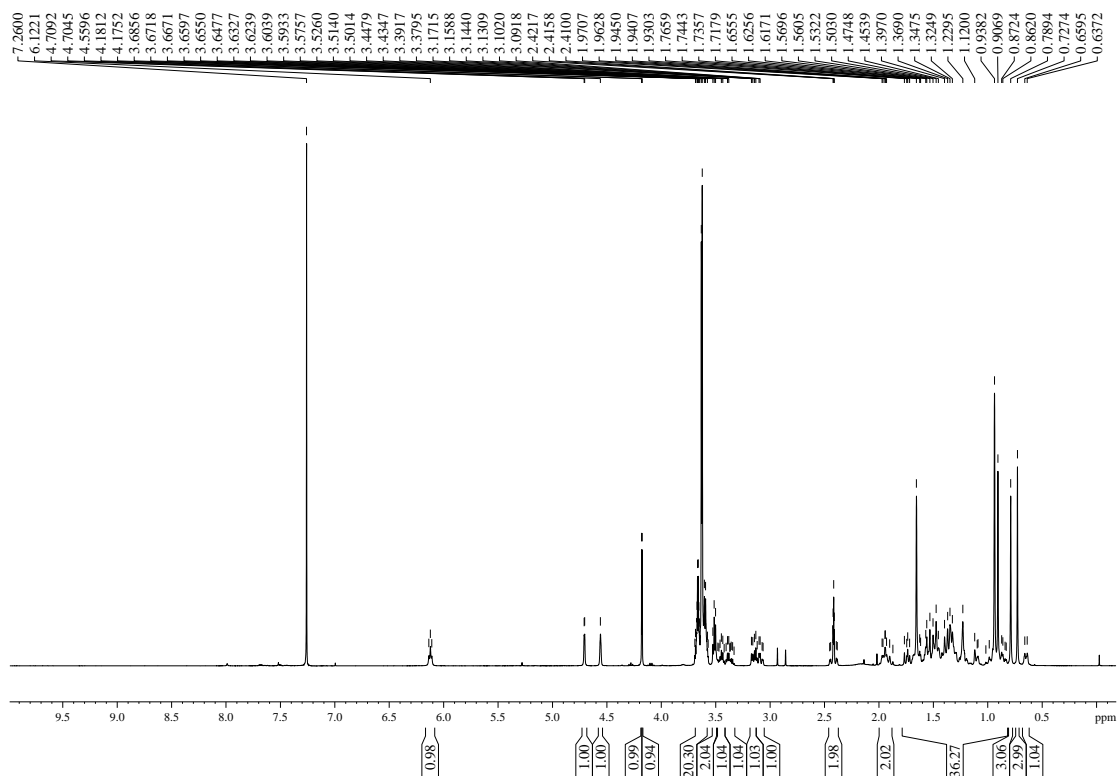

# <sup>13</sup>C NMR of compound **37**

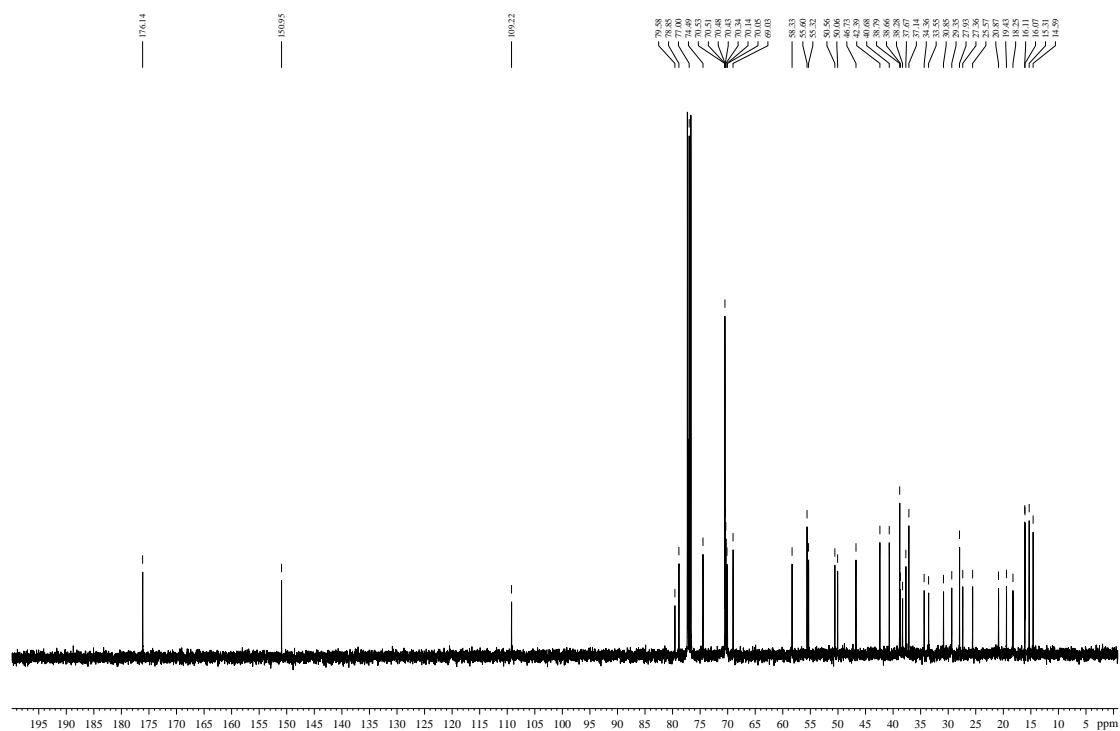

## HRMS of compound **37**

### Peking University Mass Spectrometry Sample Analysis Report

#### Analysis Info

Analysis Name FTMS-18100355\_Pos\_20181103\_000003.d  
Sample CYY2-92  
Comment

Acquisition Date 11/3/2018 8:10:39 PM  
Instrument Bruker Solarix XR FTMS  
Operator Peking University

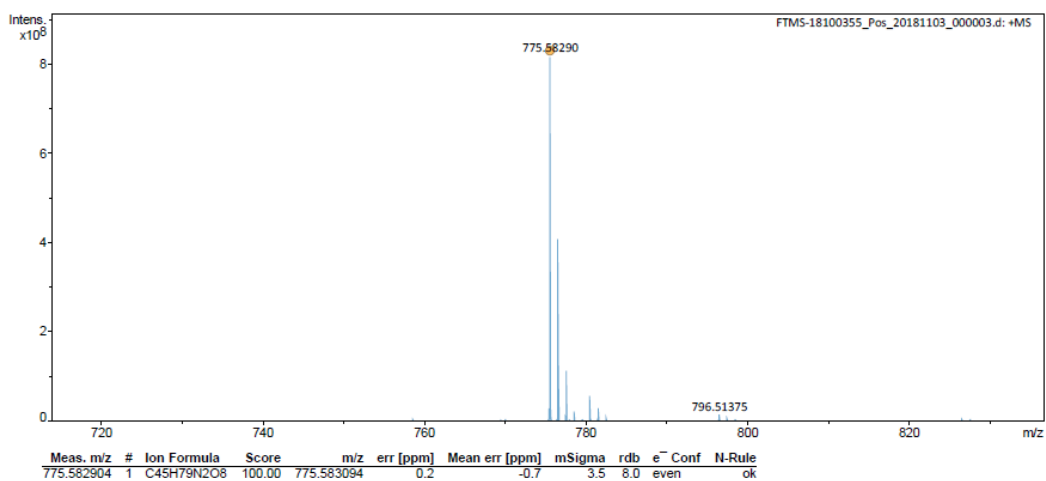

# <sup>1</sup>H NMR of compound **38**

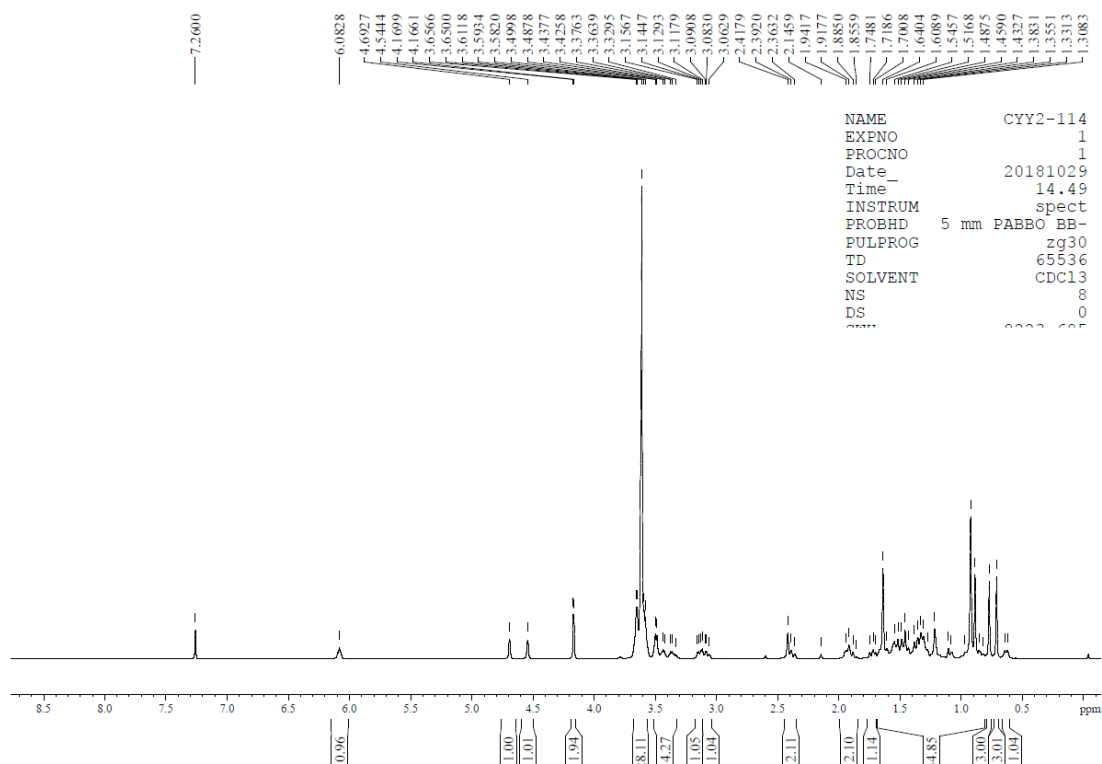

# <sup>13</sup>C NMR of compound **38**

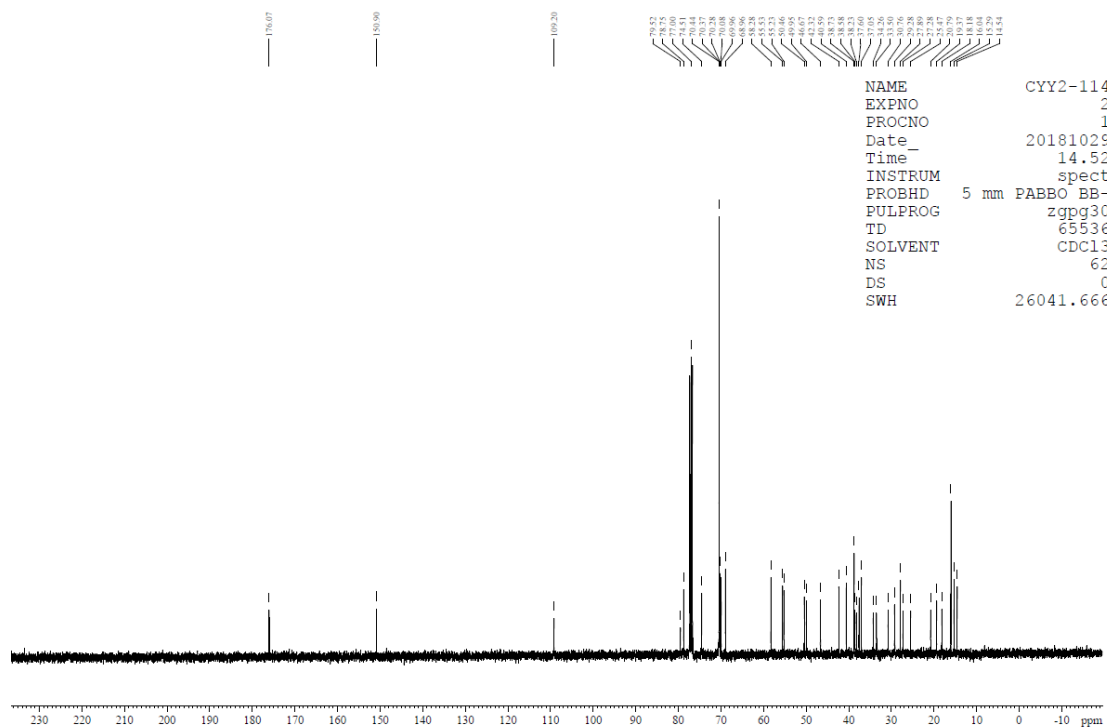

# HRMS of compound **38**

## Peking University Mass Spectrometry Sample Analysis Report

### Analysis Info

Analysis Name  
Sample  
Comment

FTMS-18100355\_Pos\_20181103\_000010.d  
CYY2-114

Acquisition Date  
Instrument  
Operator

11/3/2018 8:23:56 PM  
Bruker Solarix XR FTMS  
Peking University

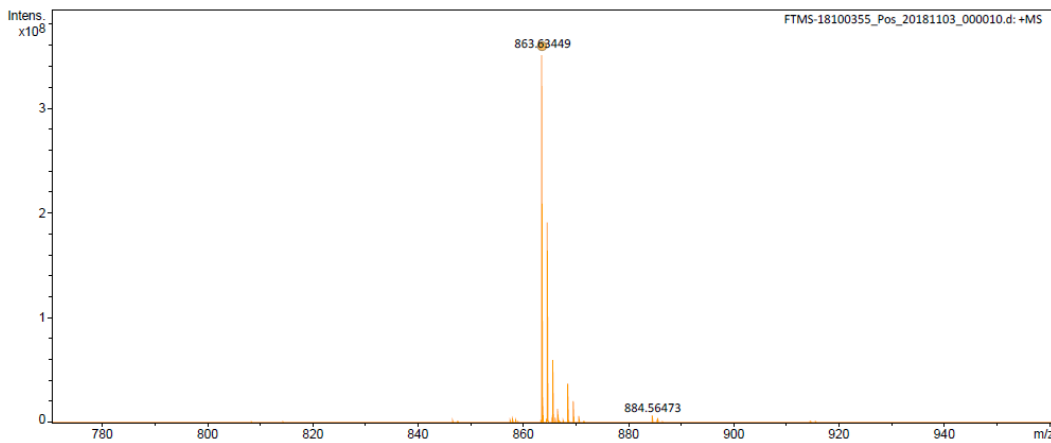

| Meas. m/z  | # | Ion Formula                                                    | Score  | m/z        | err [ppm] | Mean err [ppm] | mSigma | rdB | e <sup>-</sup> Conf | N-Rule |
|------------|---|----------------------------------------------------------------|--------|------------|-----------|----------------|--------|-----|---------------------|--------|
| 863.634490 | 1 | C <sub>49</sub> H <sub>87</sub> N <sub>2</sub> O <sub>10</sub> | 100.00 | 863.635523 | 1.2       | 1.1            | 3.5    | 8.0 | even                | ok     |

## <sup>1</sup>H NMR of compound **51**

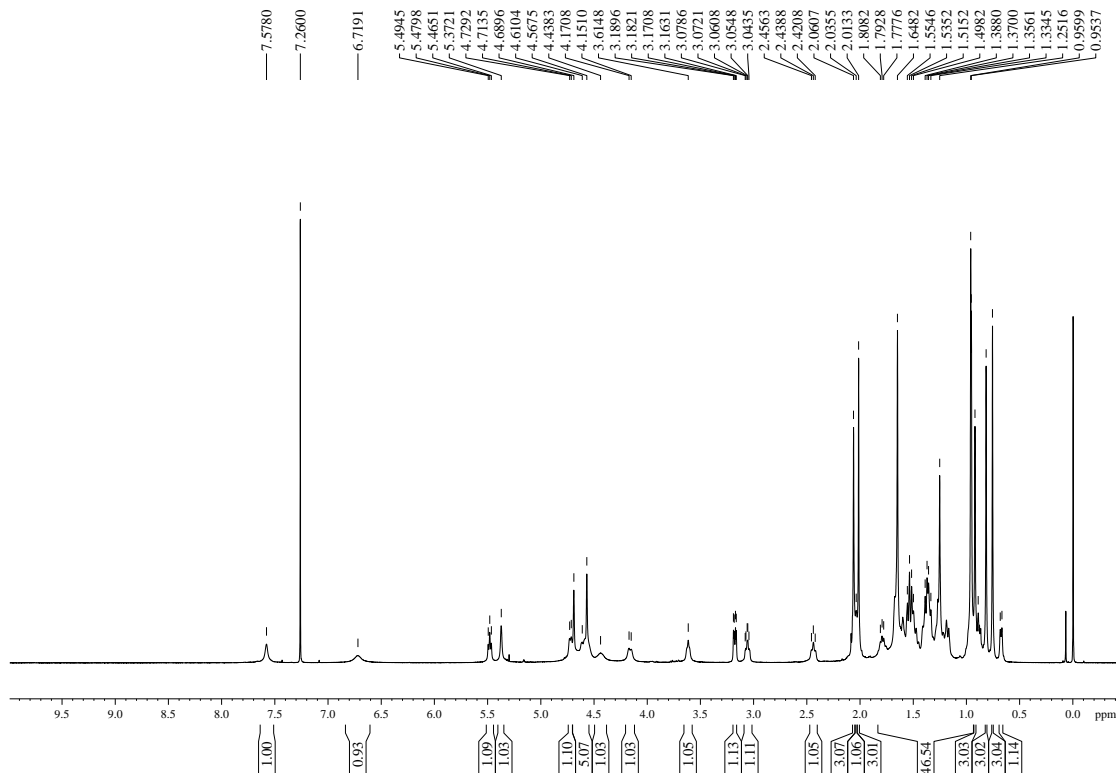

### <sup>13</sup>C NMR of compound **51**

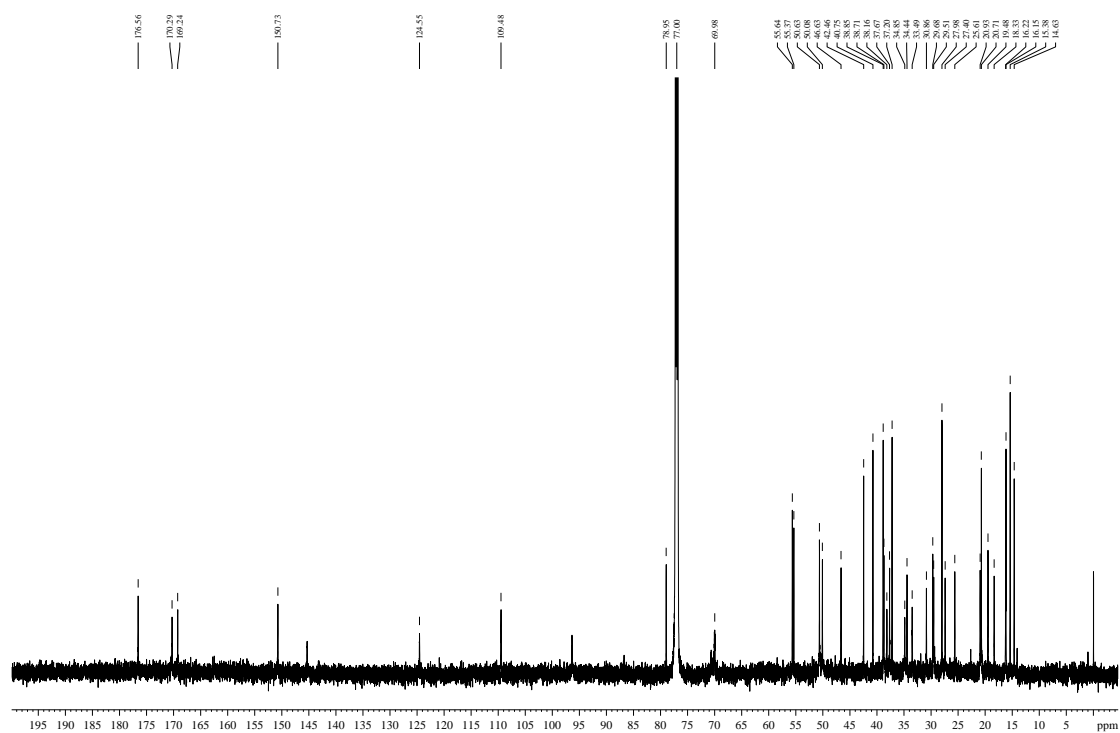

### MALDI-TOF of compound **51**

TOF/TOF™ Reflector Spec #1 MC[BP = 4611.5, 249]

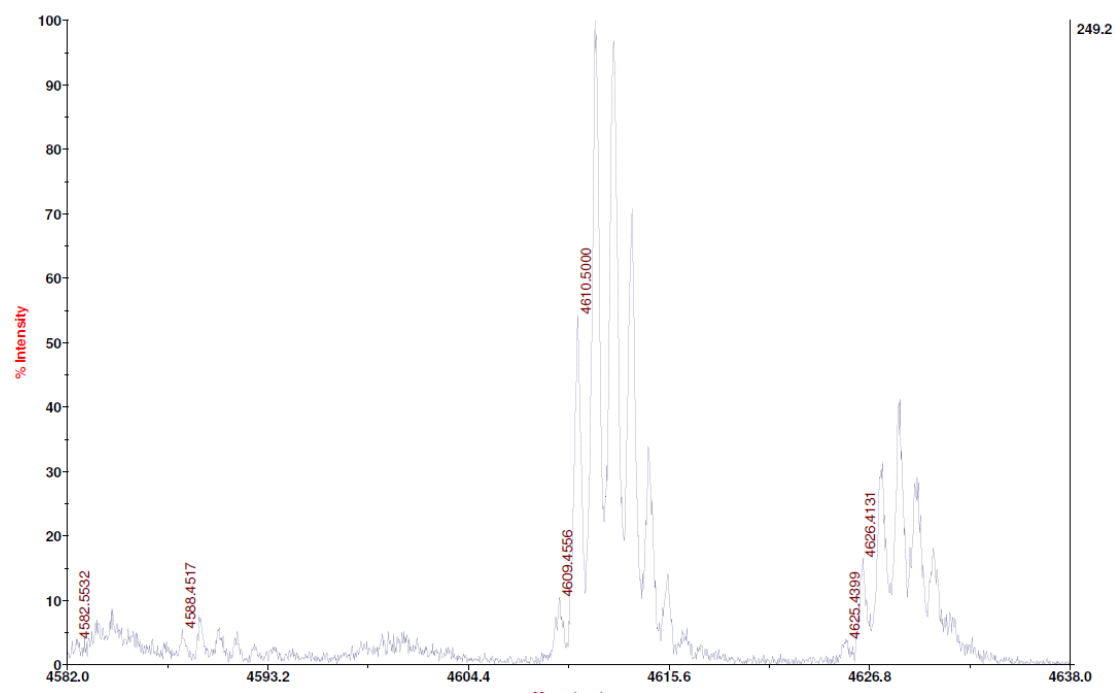

<sup>1</sup>H NMR of compound **52**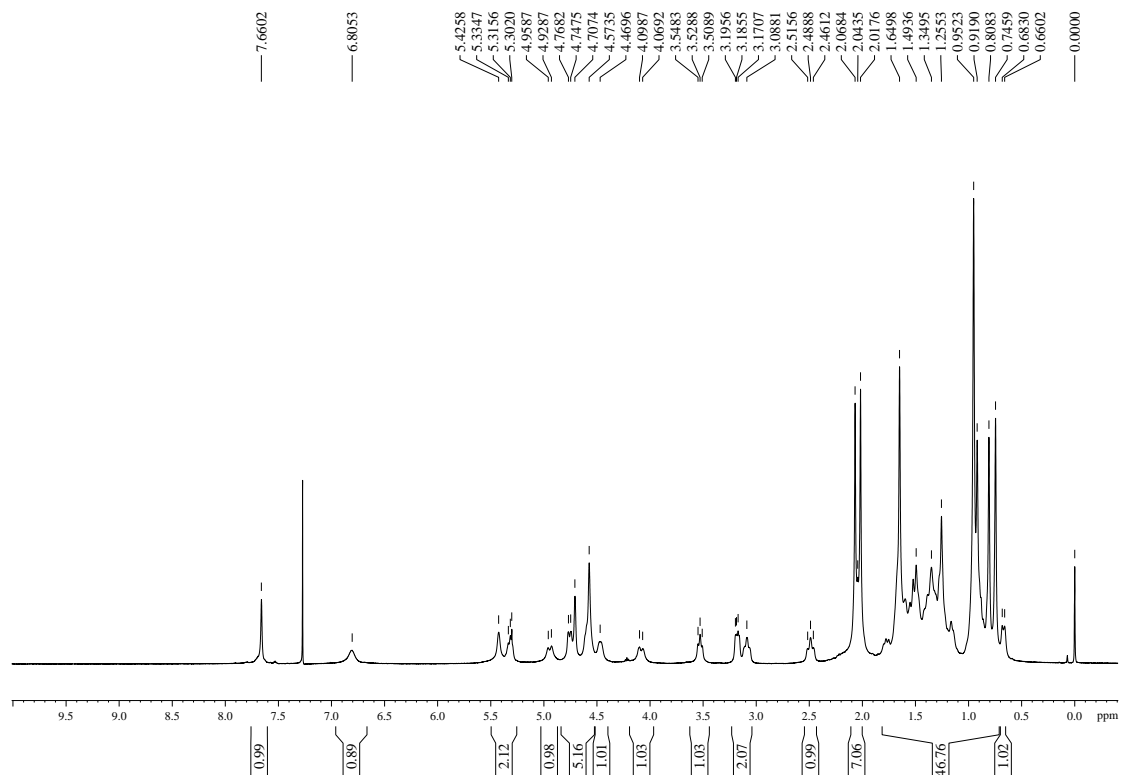 $^{13}\text{C}$  NMR of compound **52**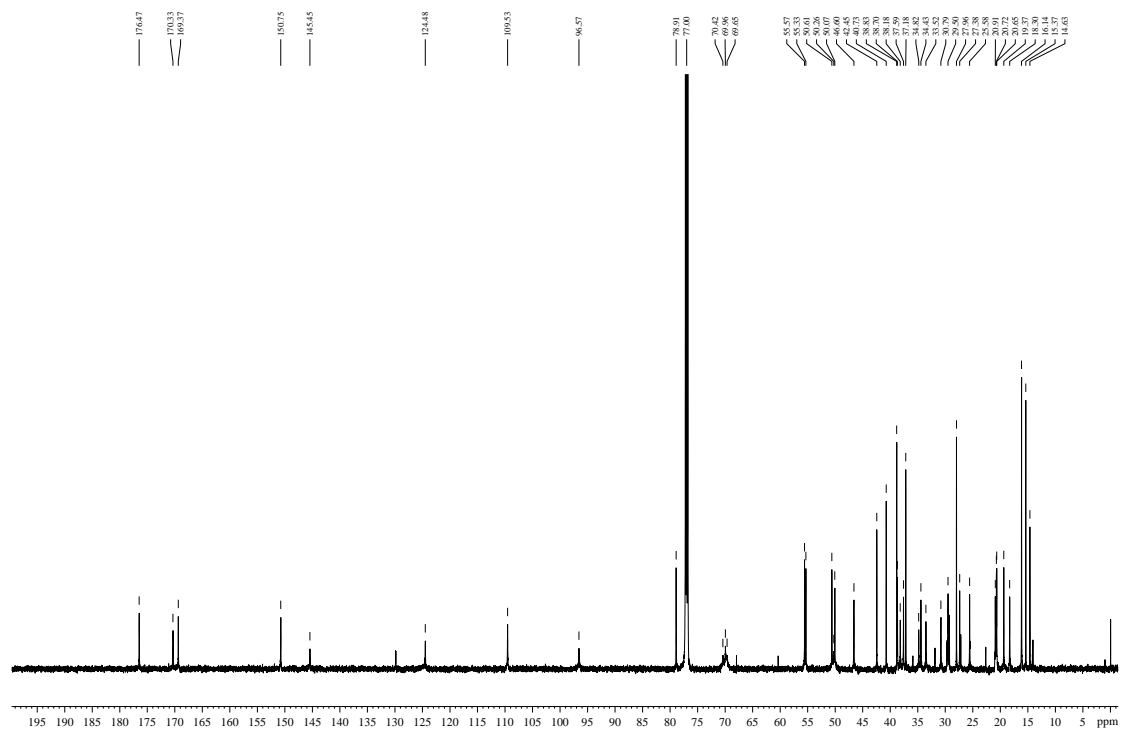

## MALDI-TOF of compound **52**

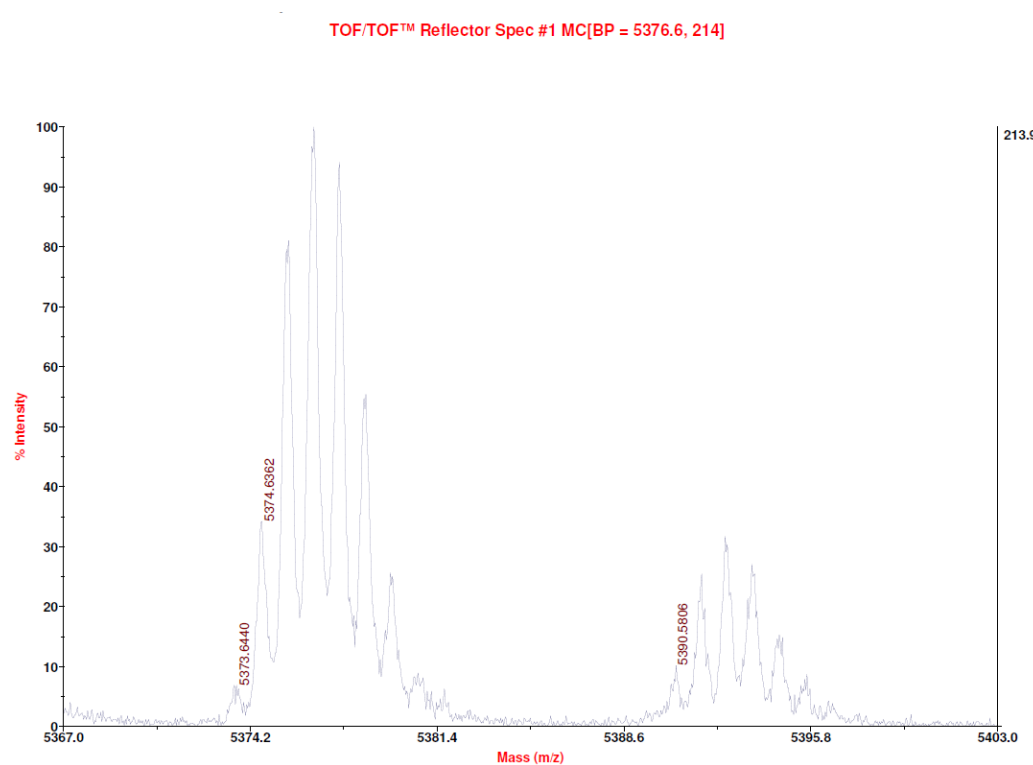

## $^1\text{H}$ NMR of compound **53**

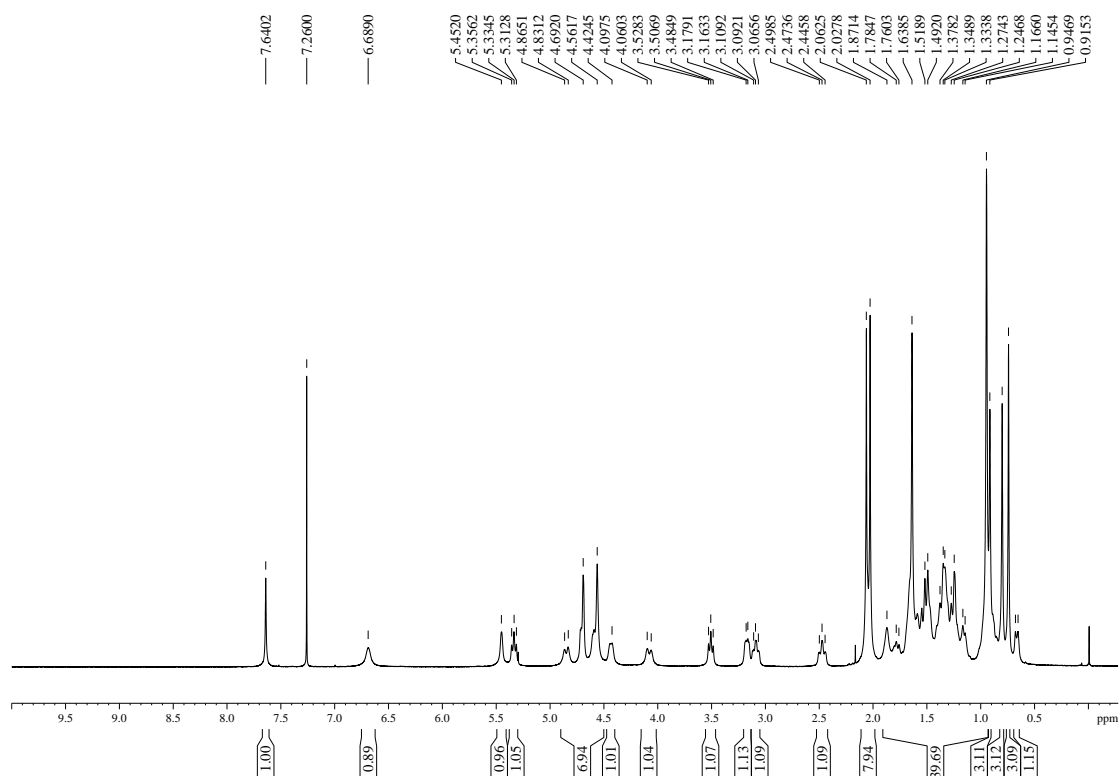

### $^{13}\text{C}$ NMR of compound **53**

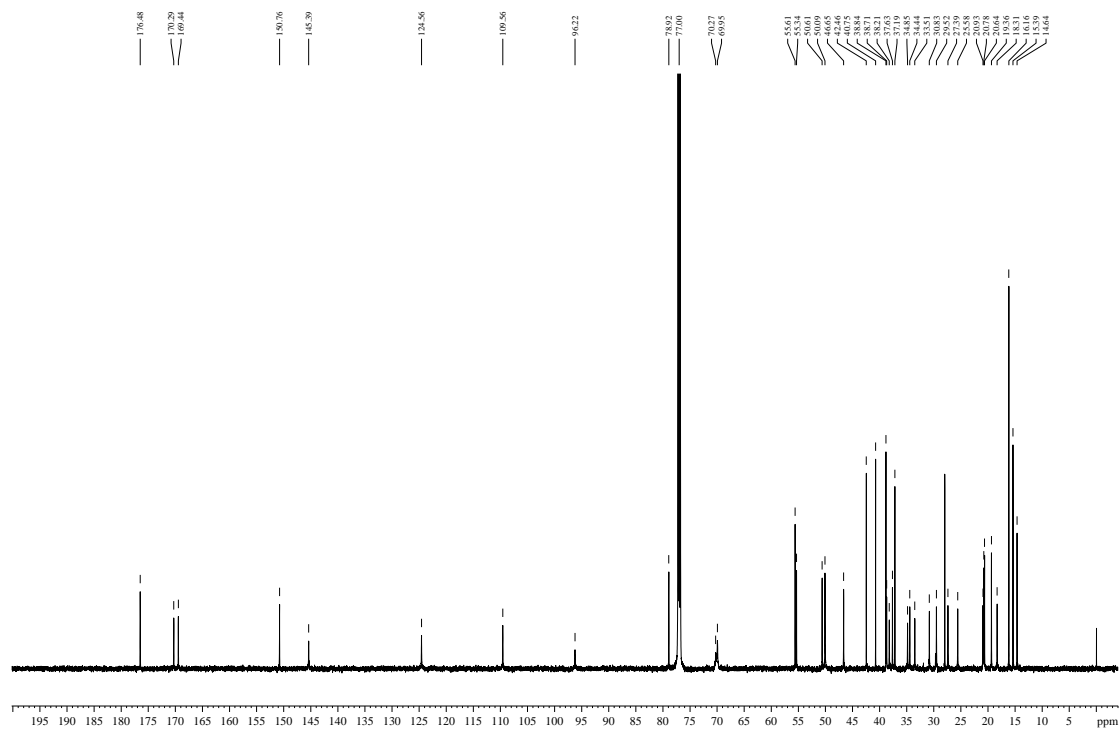

### MALDI-TOF of compound **53**

TOF/TOF™ Reflector Spec #1 MC=>SM11[BP = 4612.3, 17]

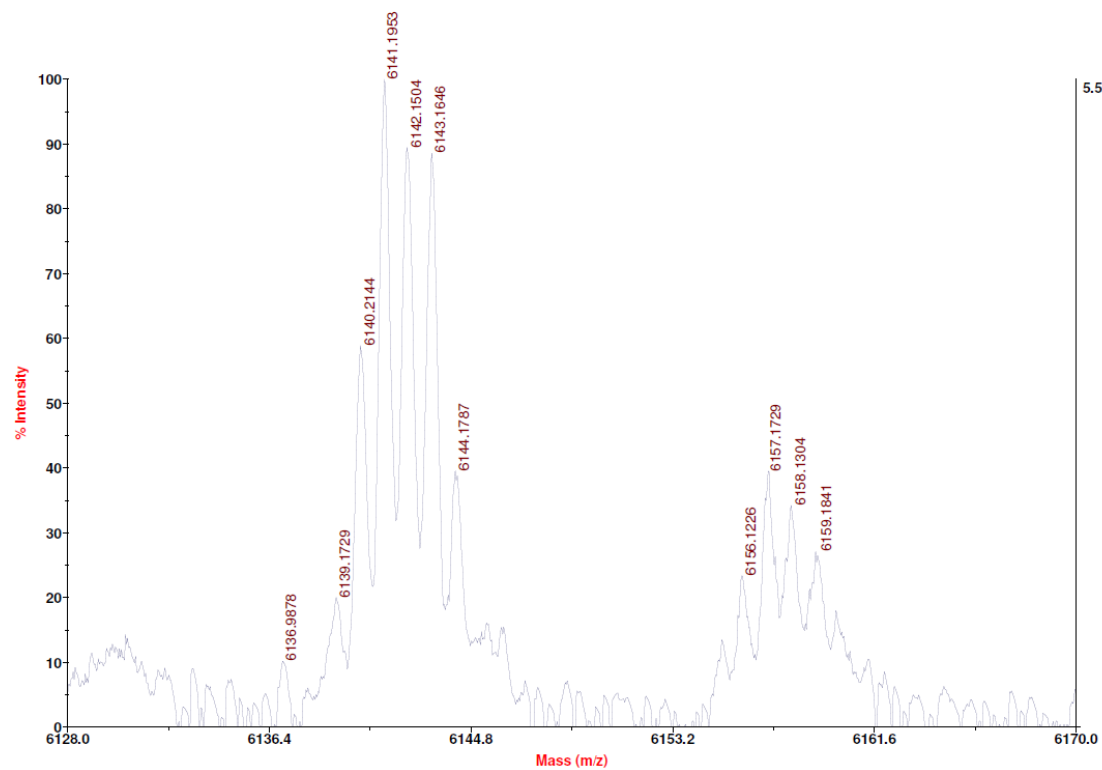

# <sup>1</sup>H NMR of compound **54**

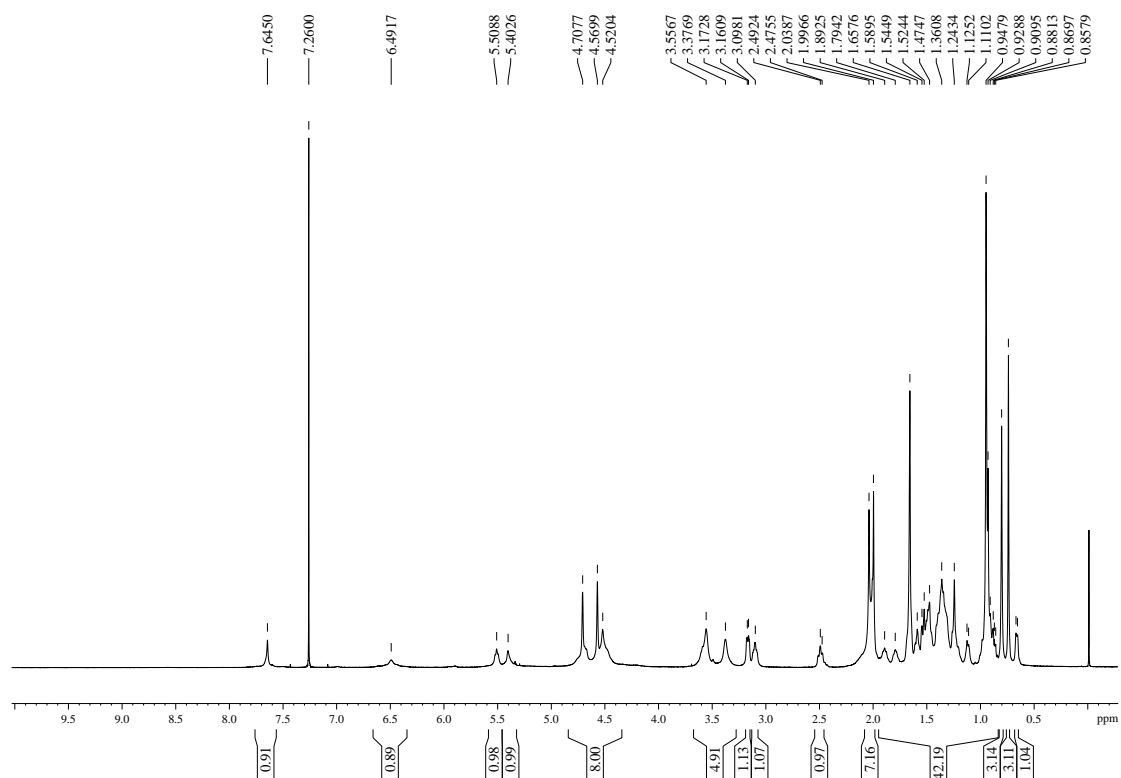

# <sup>13</sup>C NMR of compound **54**

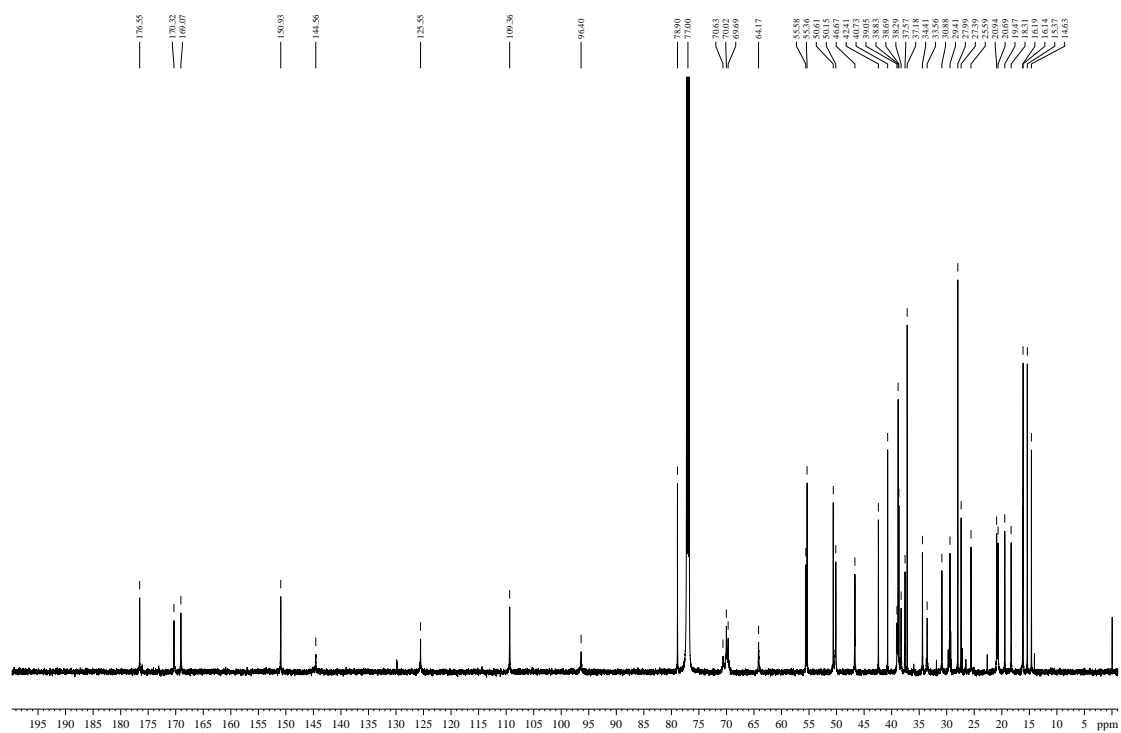

## MALDI-TOF of compound **54**

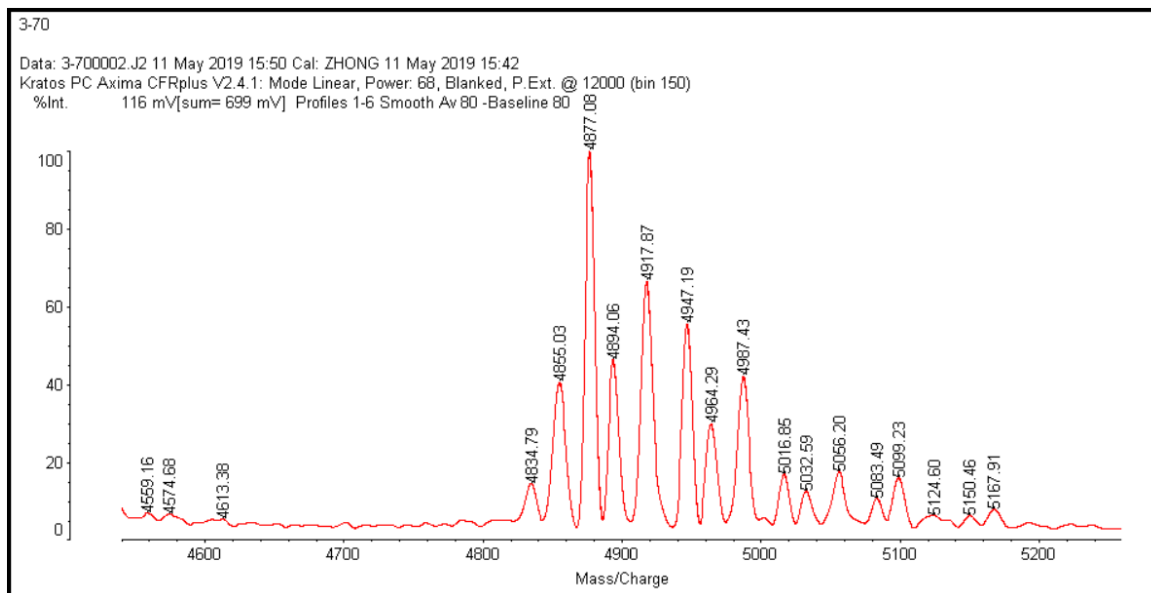

## $^1\text{H}$ NMR of compound **55**

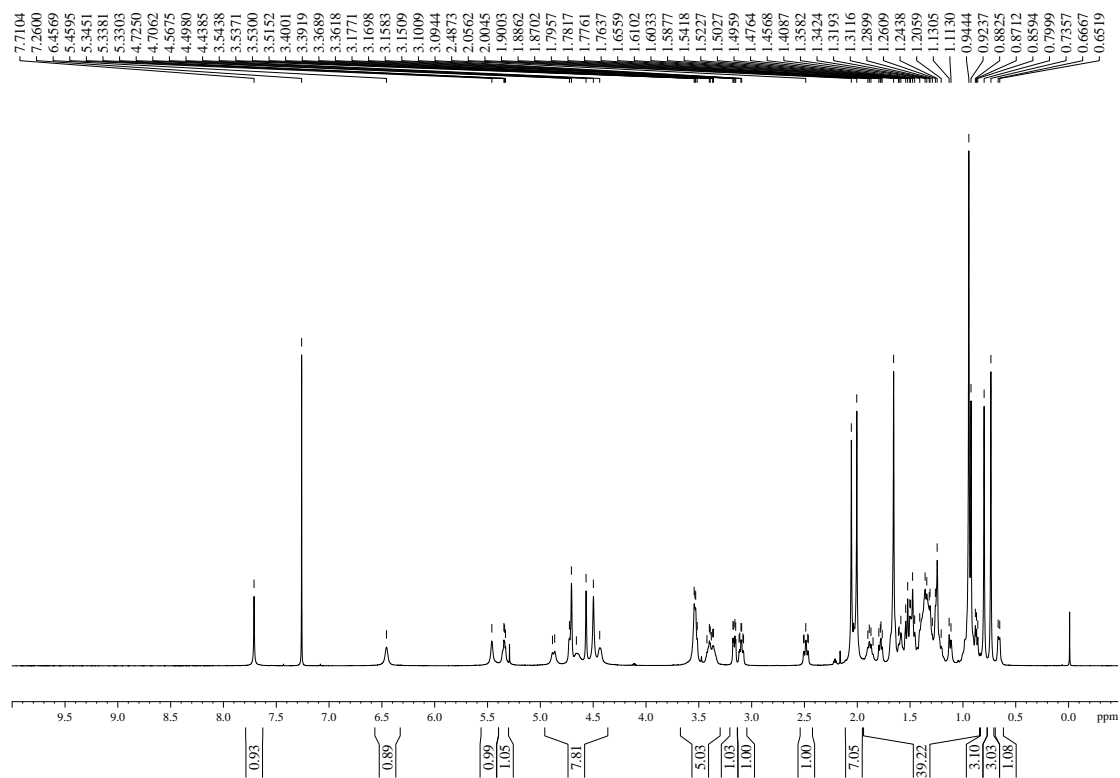

### $^{13}\text{C}$ NMR of compound **55**

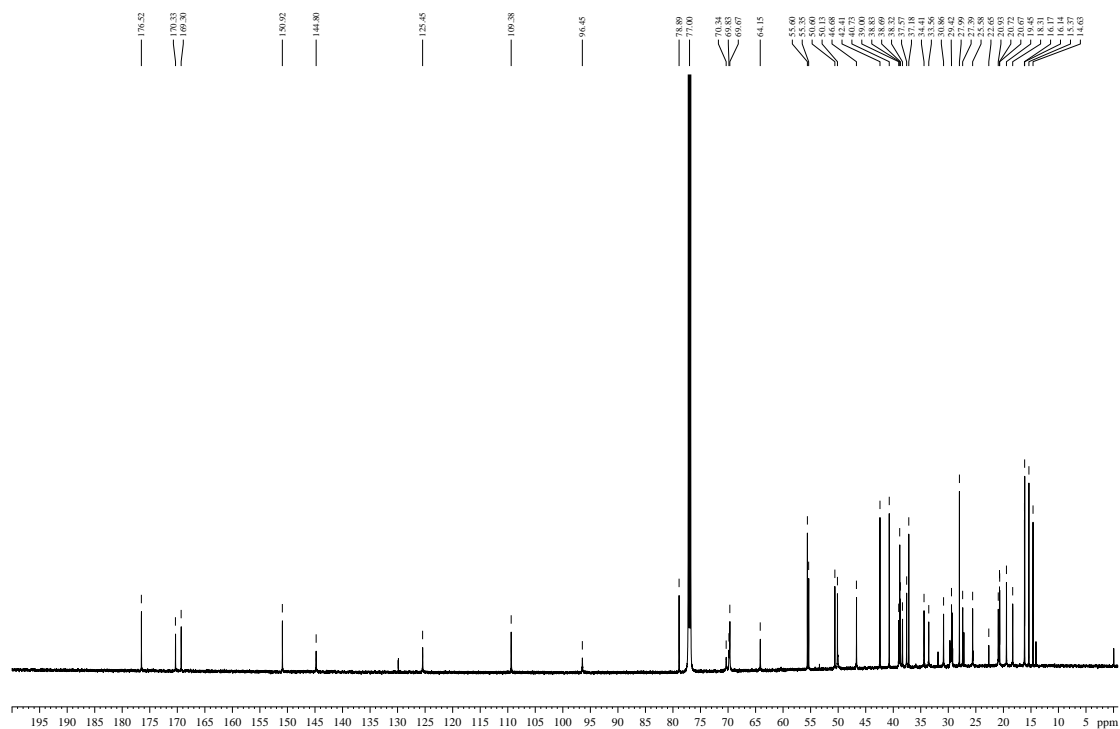

### MALDI-TOF of compound **55**

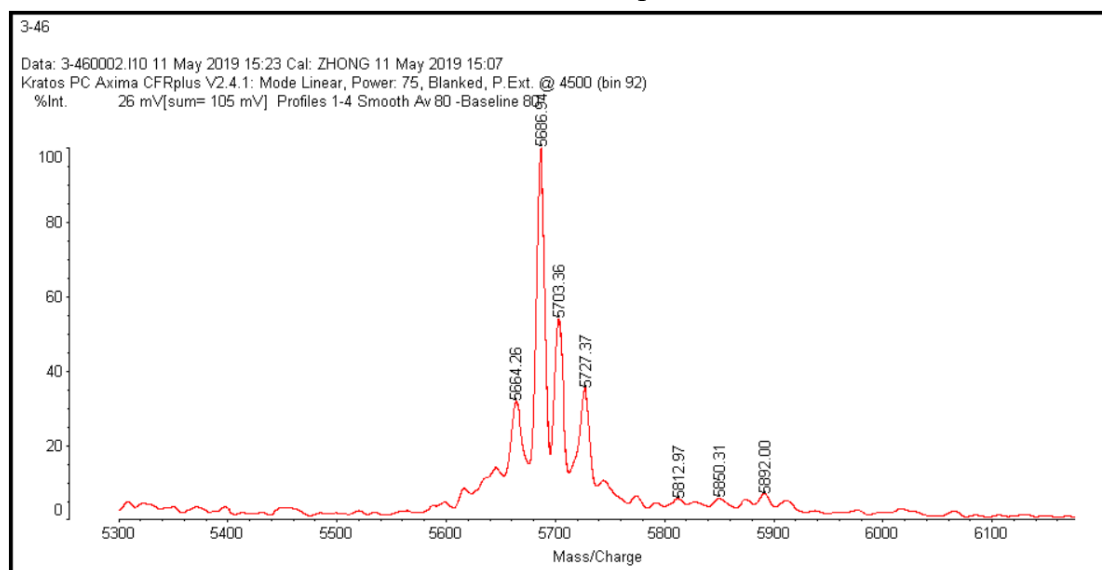

<sup>1</sup>H NMR of compound **56**

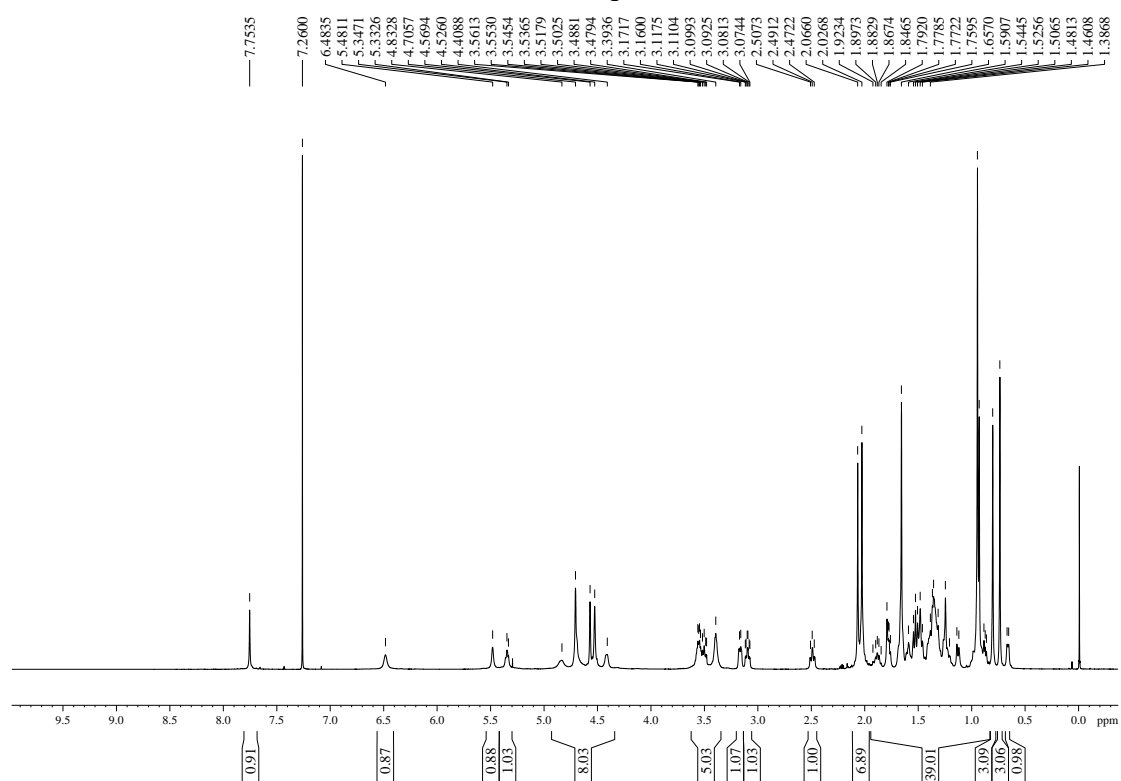

<sup>13</sup>C NMR of compound **56**

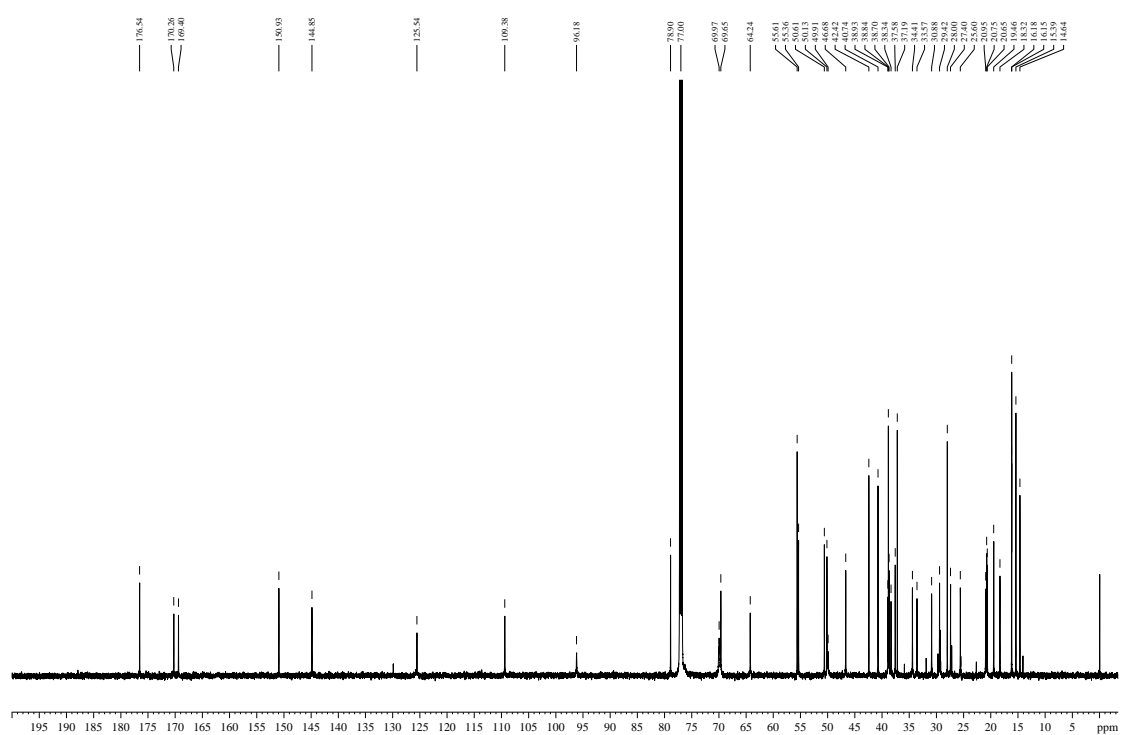

## MALDI-TOF of compound **56**

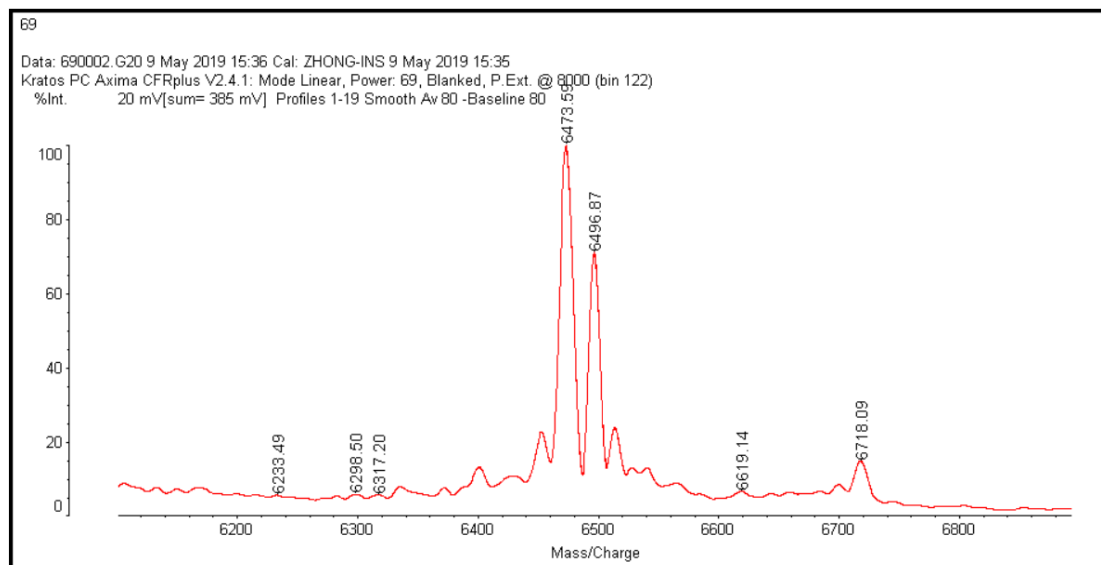

## $^1\text{H}$ NMR of compound **57**

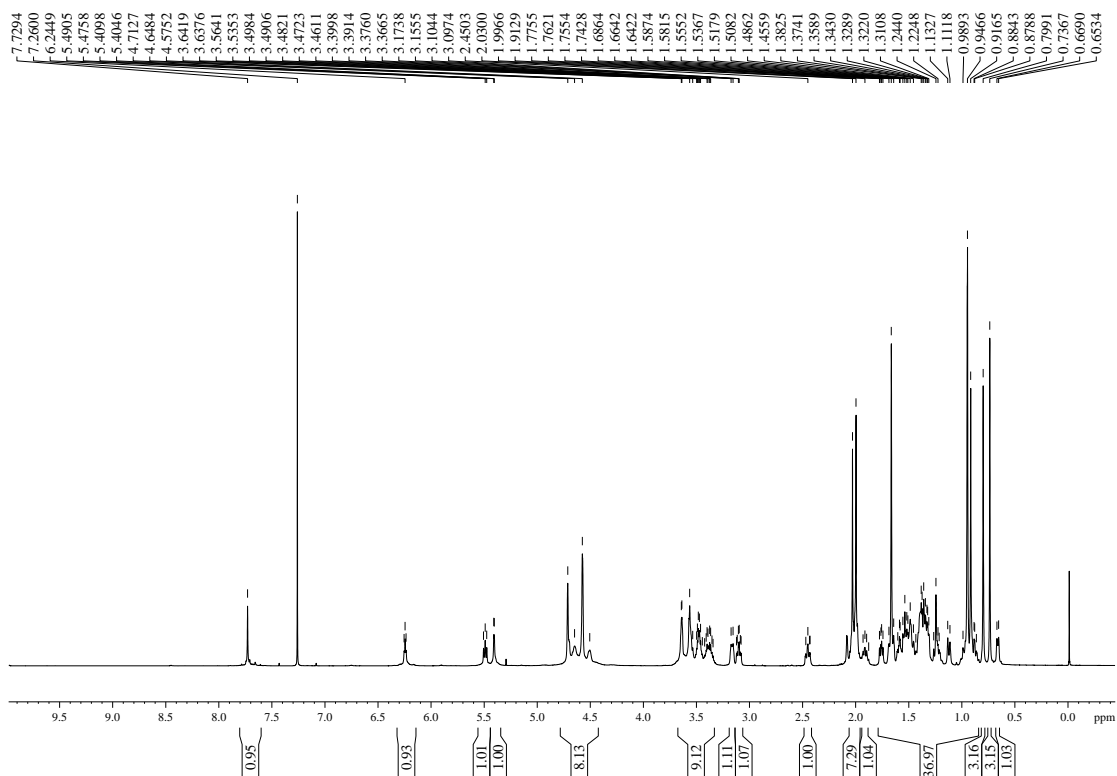

# <sup>13</sup>C NMR of compound **57**

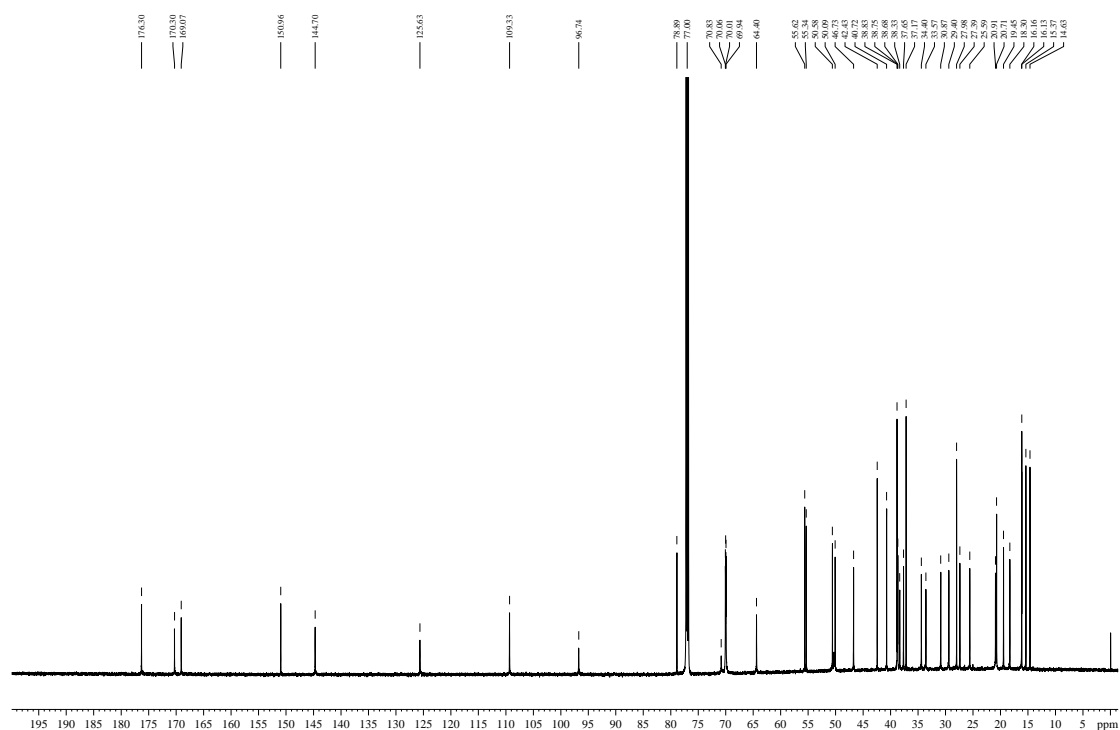

# MALDI-TOF of compound **57**

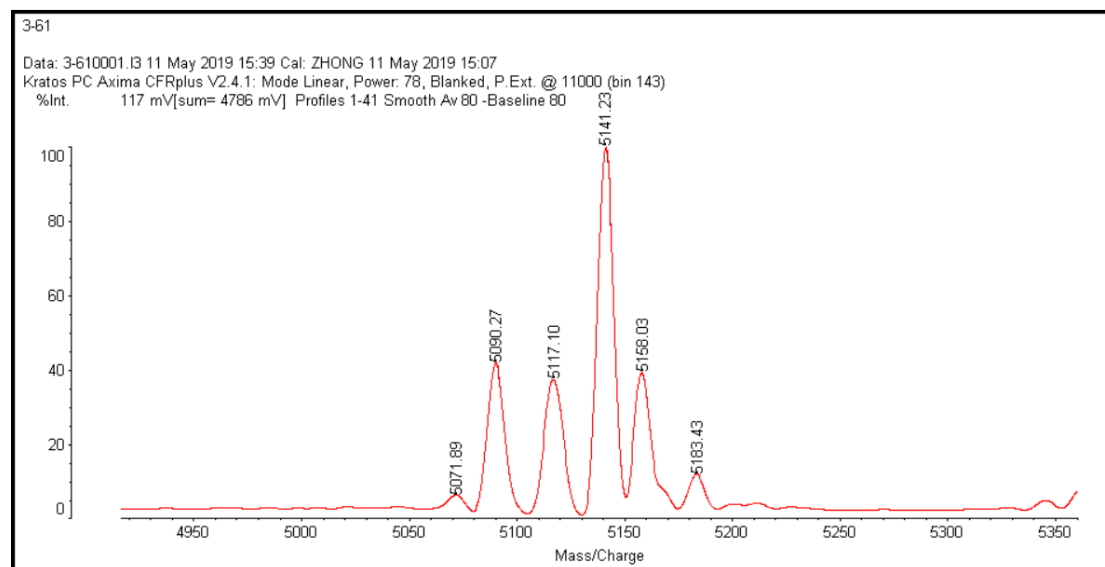

Chemical shifts (ppm): 7.7631, 7.2600, 6.2271, 5.4938, 4.7351, 4.7292, 4.7138, 4.5716, 4.5503, 3.6462, 3.6391, 3.6338, 3.5839, 3.5768, 3.5086, 3.4920, 3.4828, 3.1758, 3.1683, 3.1569, 3.1041, 3.0971, 2.0491, 2.0065, 1.9777, 1.9102, 1.9001, 1.7574, 1.7508, 1.6634, 1.6411, 1.5864, 1.5806, 1.5560, 1.5474, 1.5373, 1.5290, 1.5187, 1.5130, 1.5079, 1.4897, 1.4794, 1.4587, 1.4096, 1.4006, 1.3830, 1.3719, 1.3564, 1.3451, 1.3376, 1.3305, 1.3237, 1.3179, 1.3086, 1.2634, 1.2427, 1.2307, 1.1332, 0.9492, 0.9450, 0.9152, 0.8817, 0.7975, 0.7348, 0.6673, 0.6517.

## MALDI-TOF of compound **58**

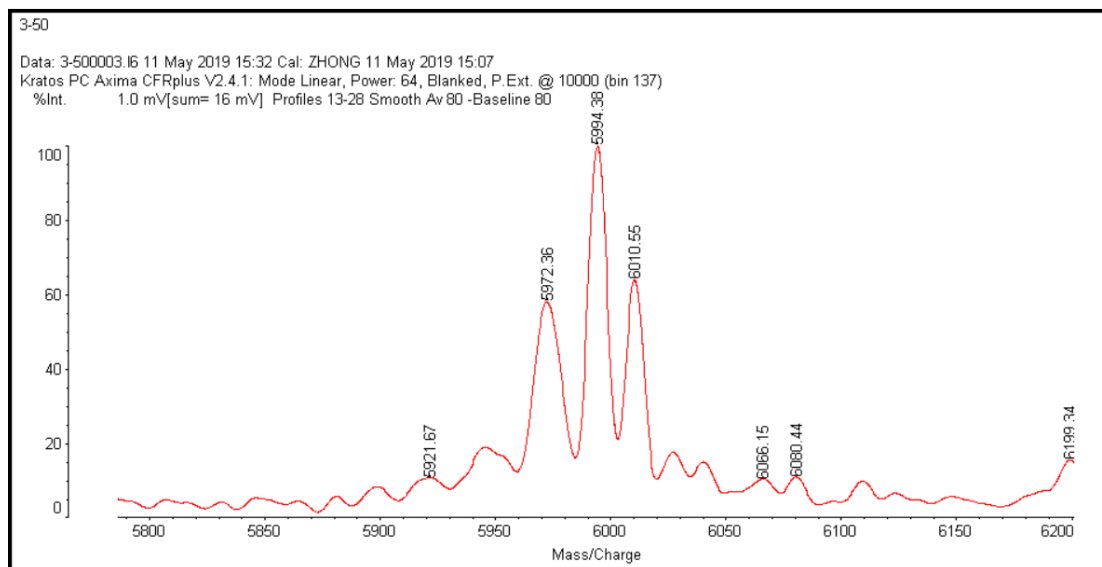

## $^1\text{H}$ NMR of compound **59**

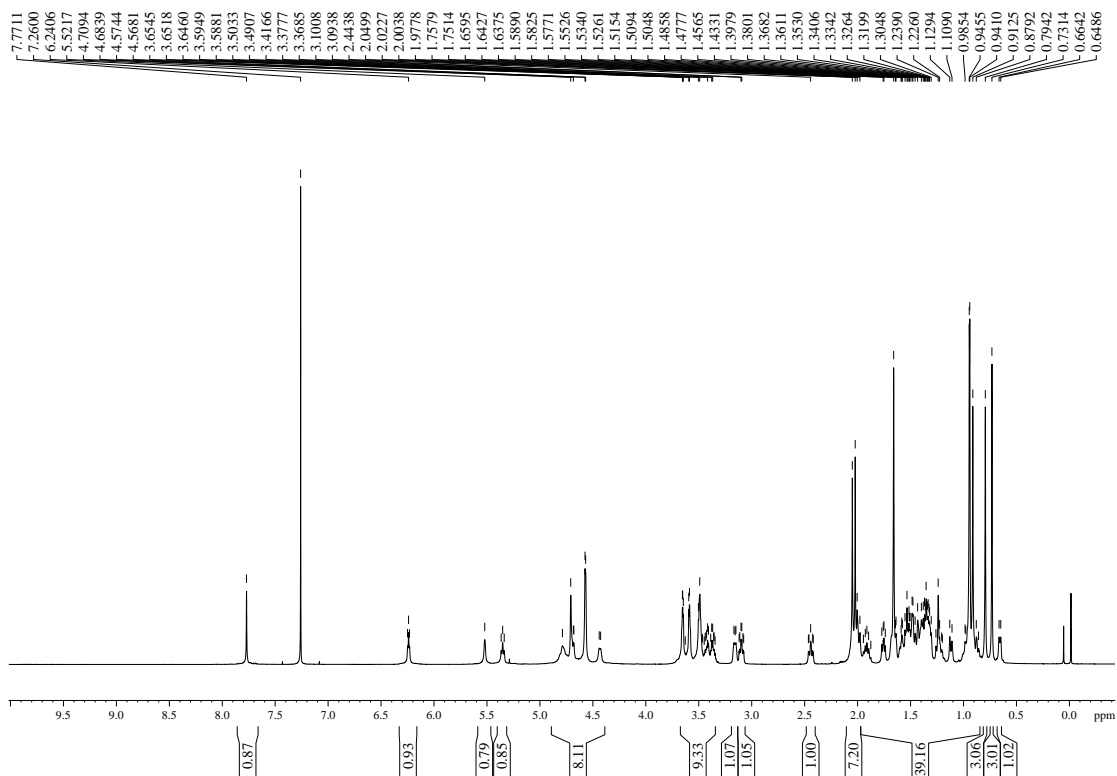

# <sup>13</sup>C NMR of compound **59**

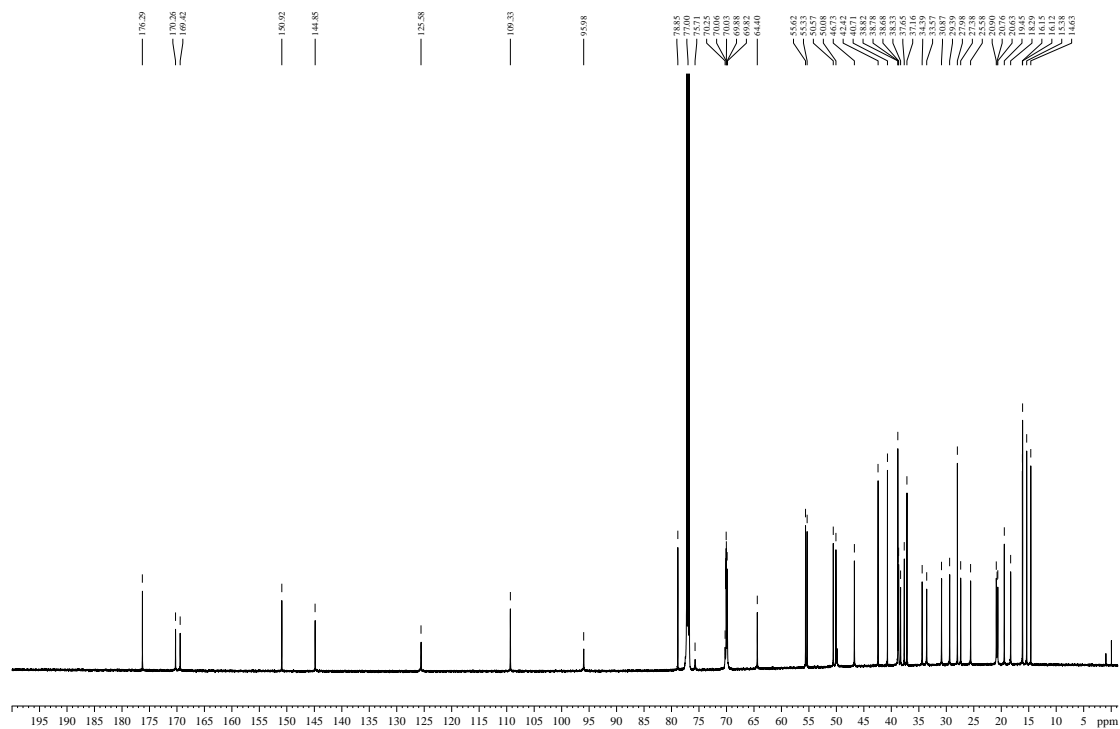

# MALDI-TOF of compound **59**

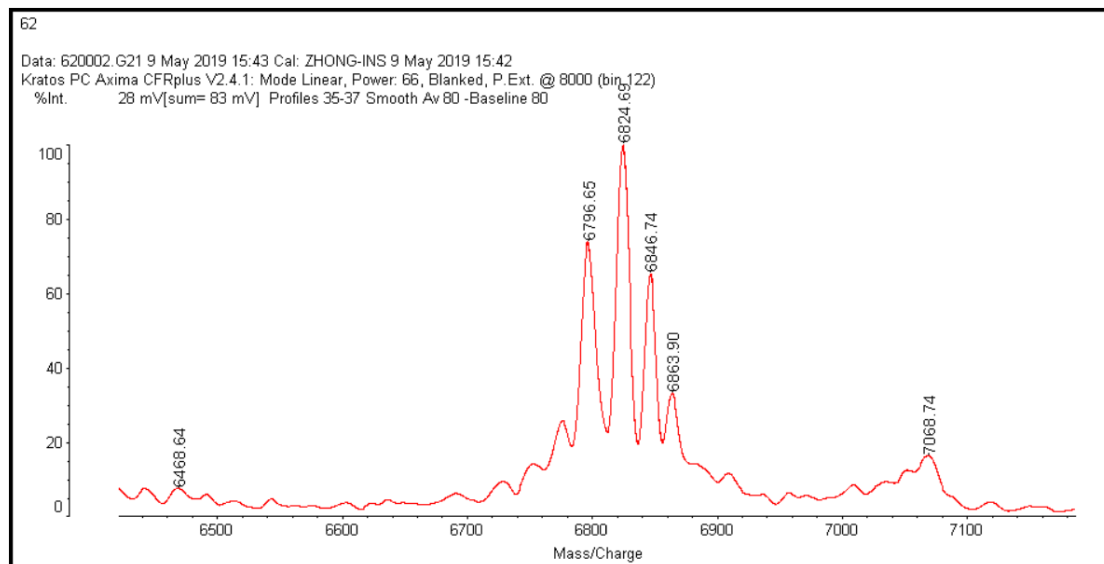

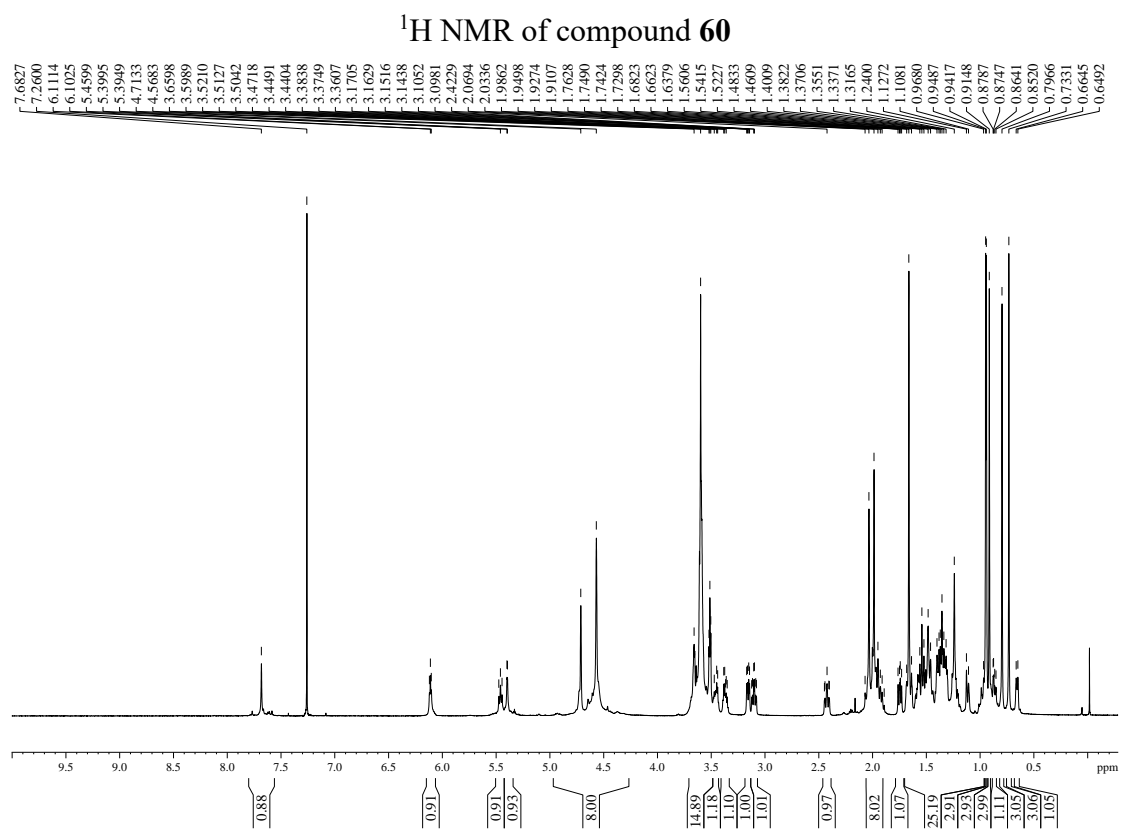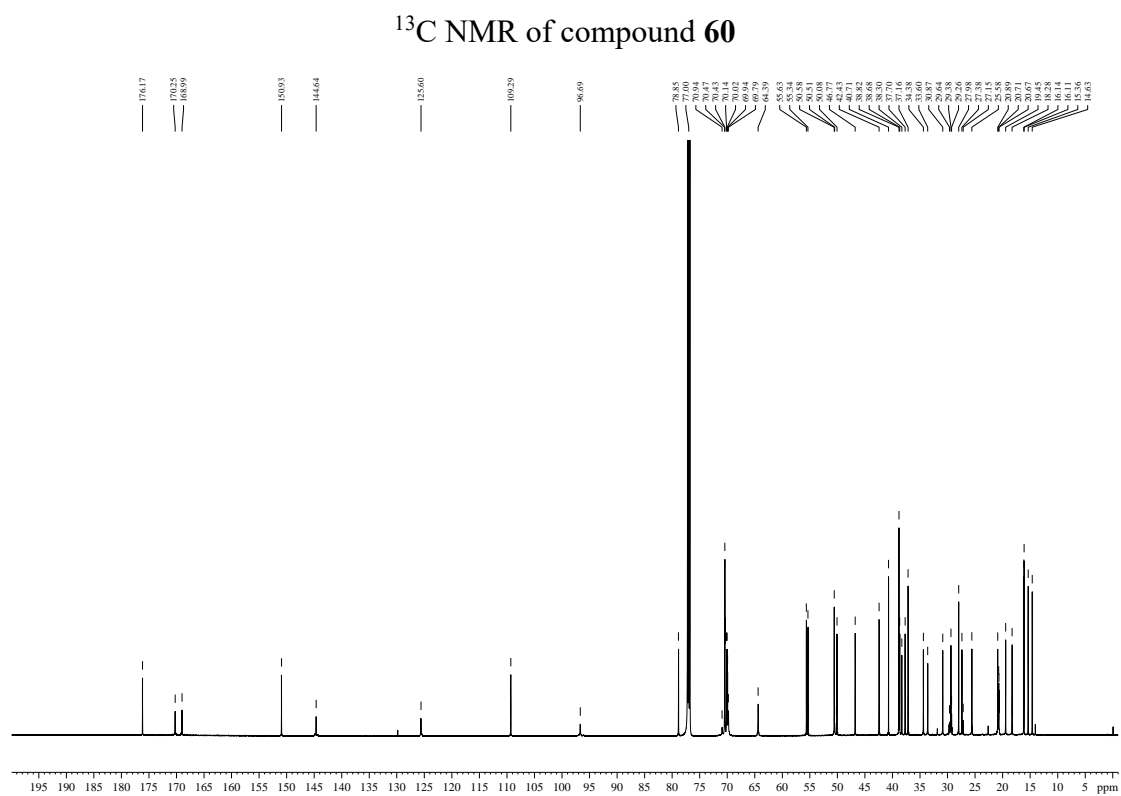

## MALDI-TOF of compound **60**

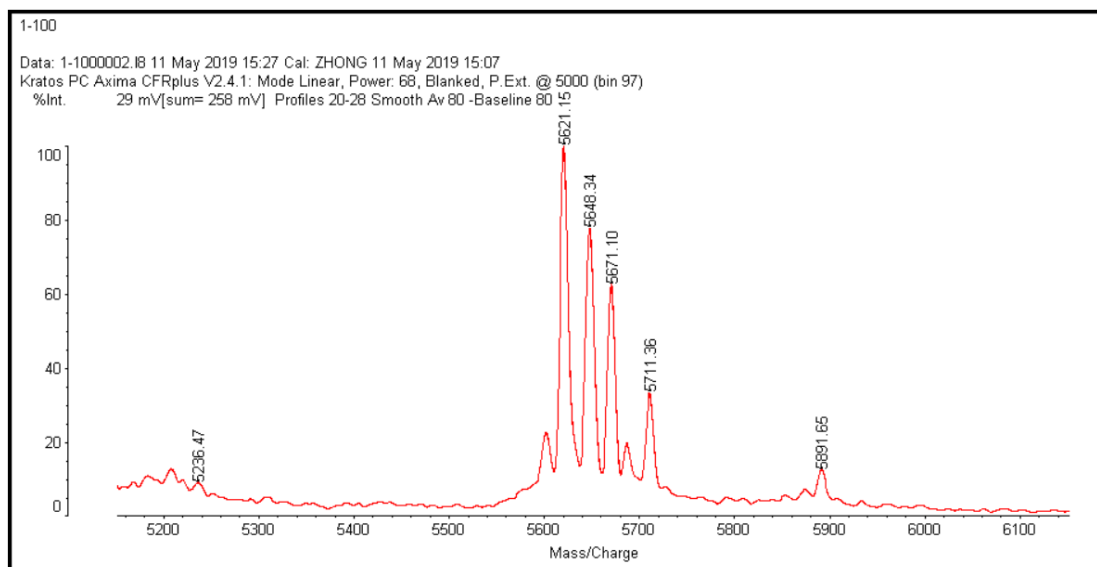

## $^1\text{H}$ NMR of compound **61**

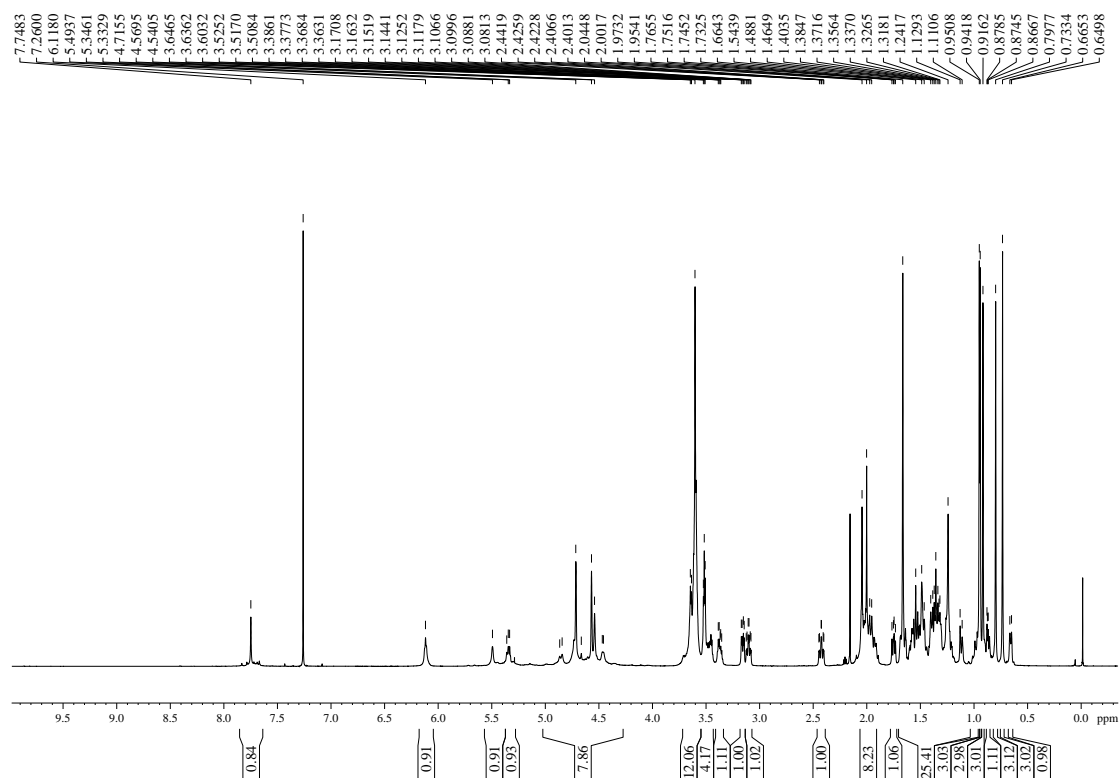

# <sup>13</sup>C NMR of compound **61**

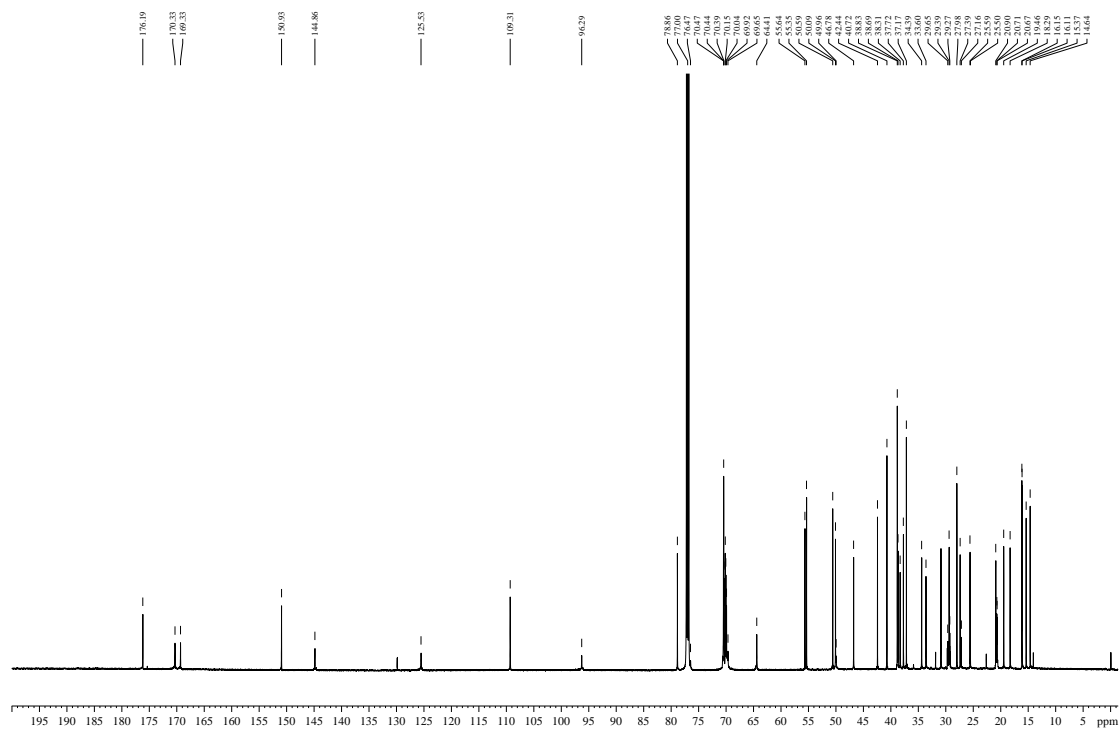

# MALDI-TOF of compound **61**

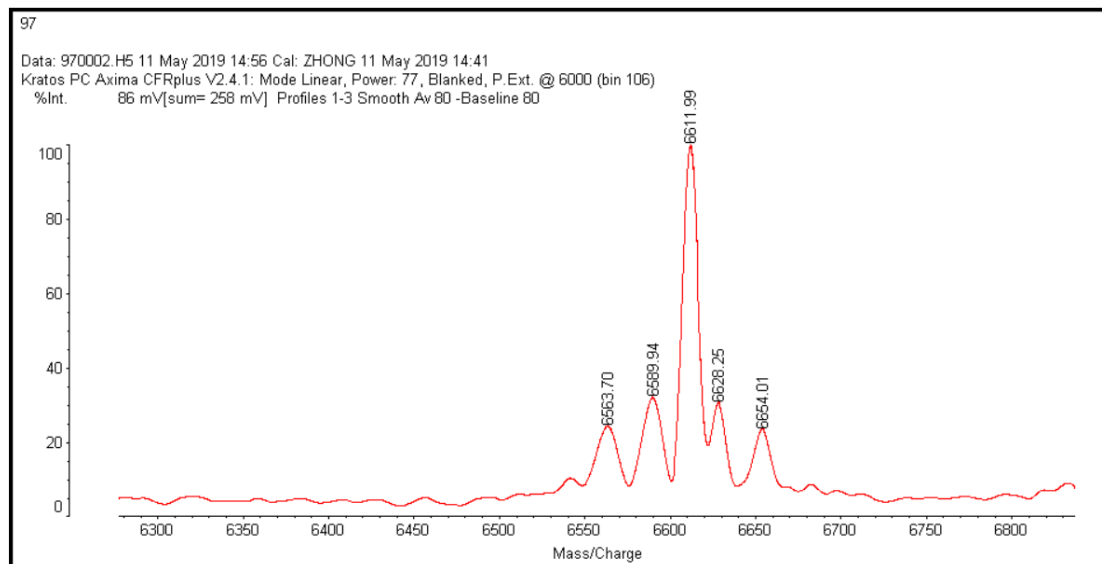

# <sup>1</sup>H NMR of compound **62**

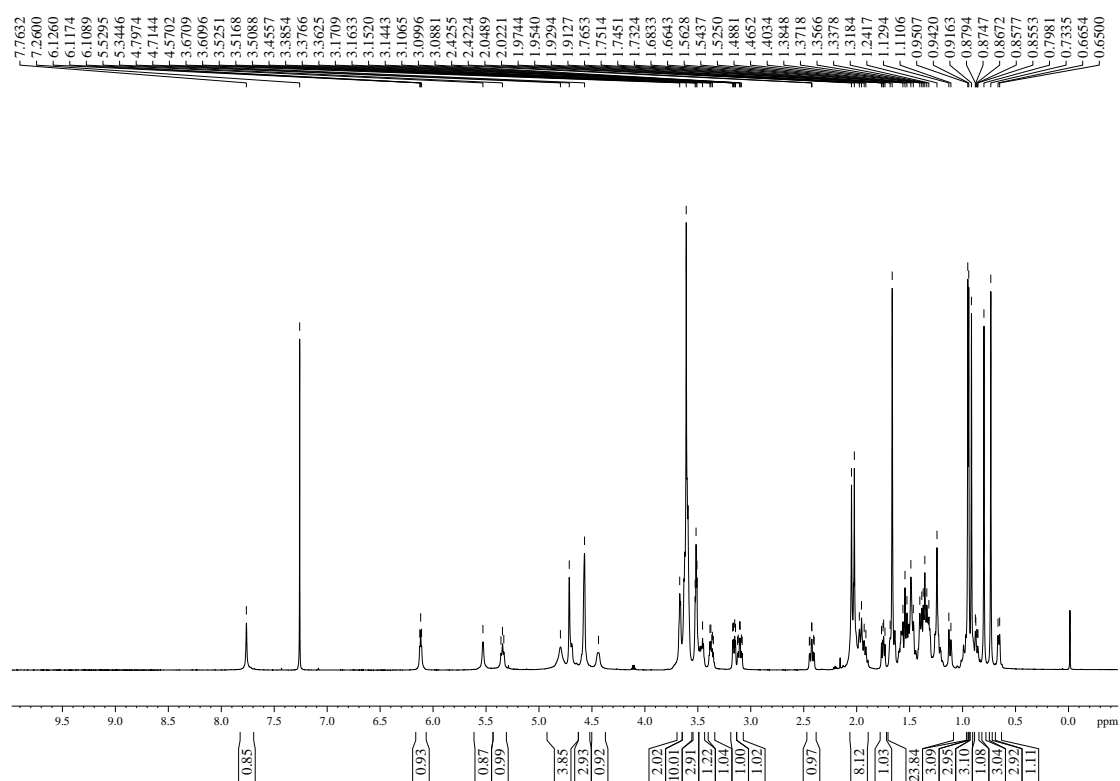

# <sup>13</sup>C NMR of compound **62**

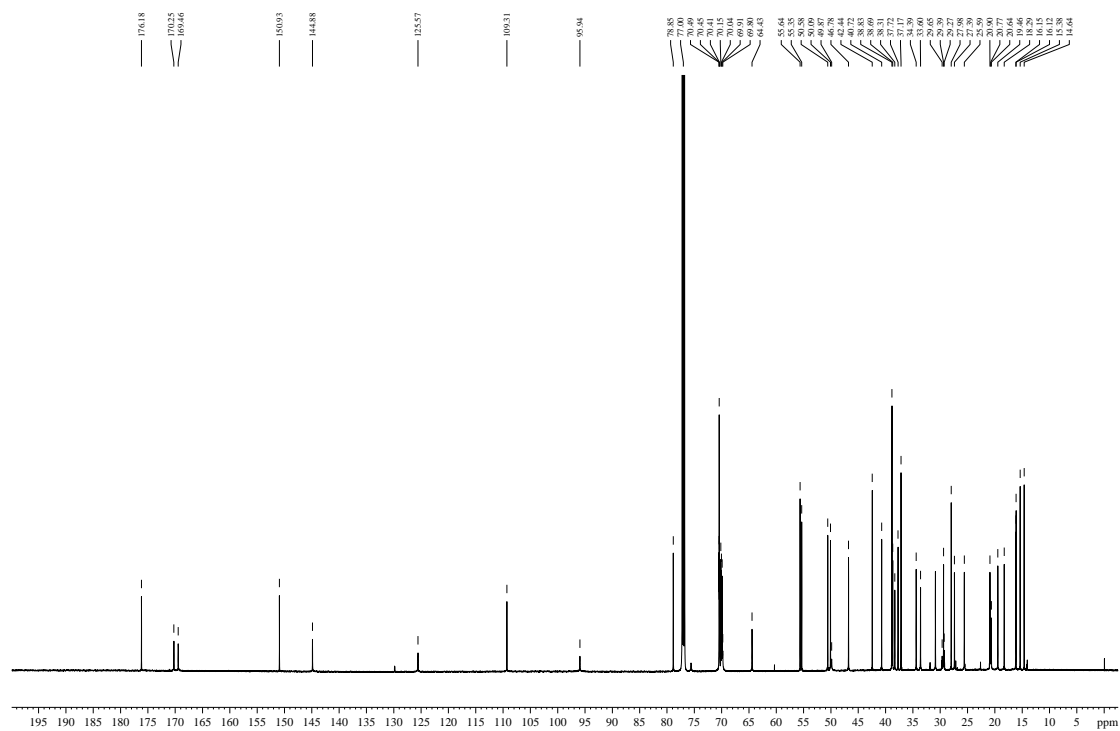

## MALDI-TOF of compound **62**

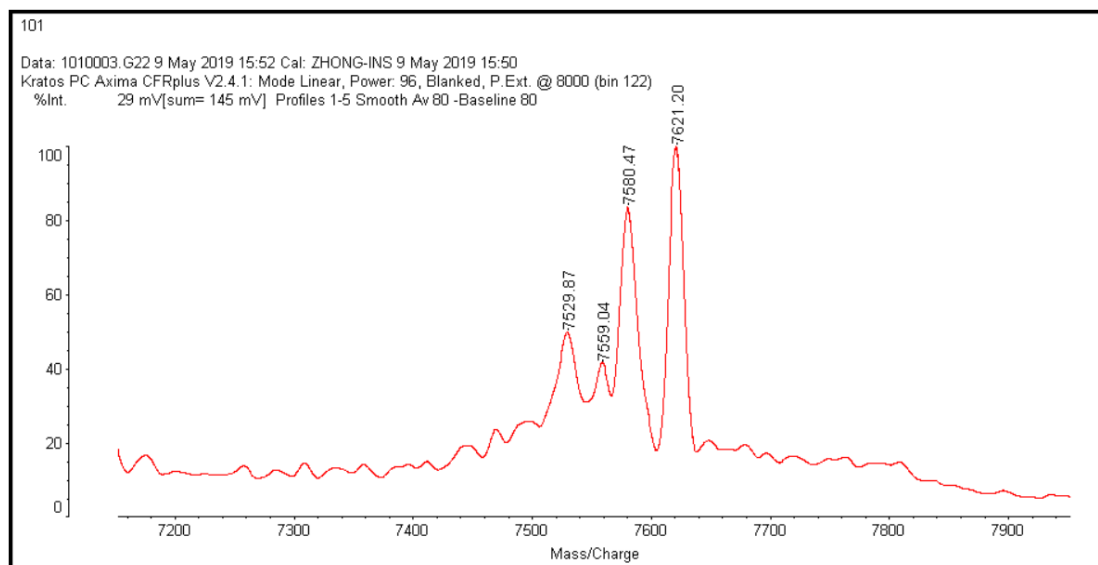

## $^1\text{H}$ NMR of compound **63**

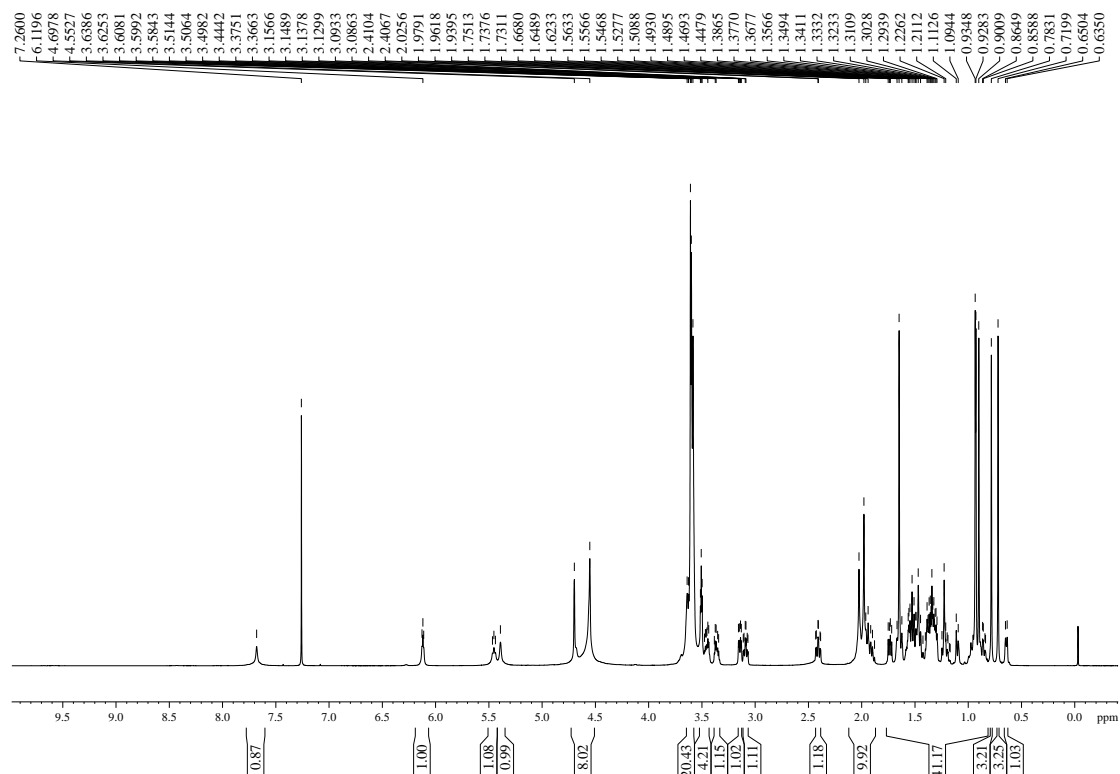

### $^{13}\text{C}$ NMR of compound **63**

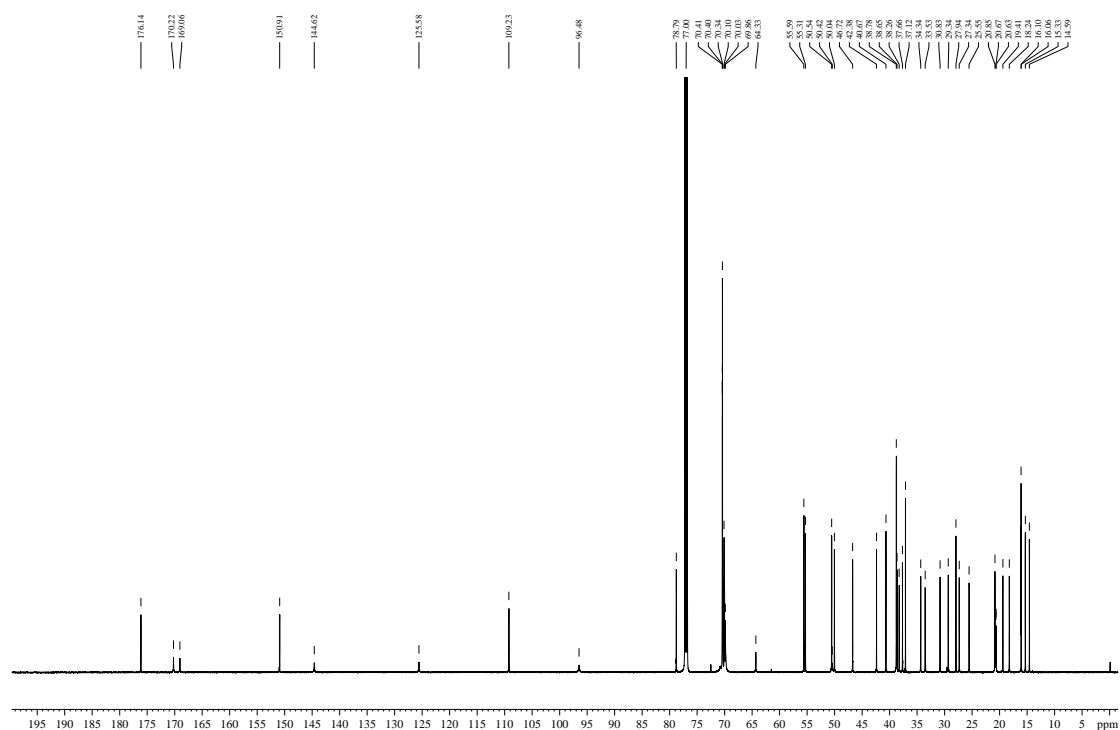

### MALDI-TOF of compound **63**

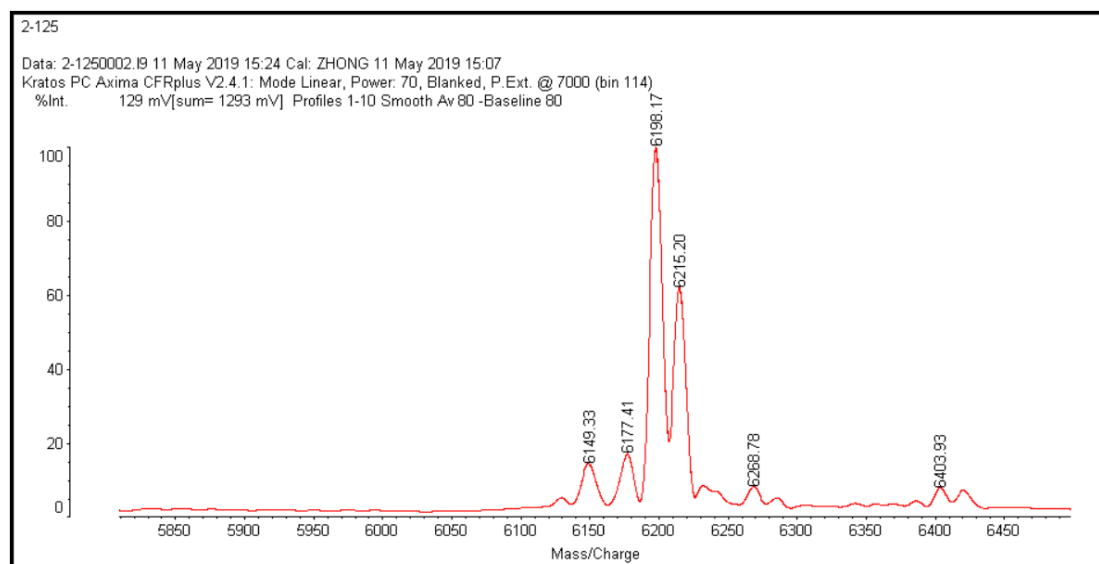

Chemical shifts ( $\delta$ ) listed on the right side of the spectrum (ppm): 7.7538, 7.2600, 6.1313, 4.7192, 4.5728, 4.5414, 3.6279, 3.6223, 3.6042, 3.5256, 3.5175, 3.4974, 3.4887, 3.4654, 3.4571, 3.3940, 3.3854, 3.1753, 3.1683, 3.1569, 3.1494, 3.1120, 3.1055, 2.4273, 2.0484, 2.0302, 2.0048, 1.9792, 1.9581, 1.9366, 1.9205, 1.7704, 1.7503, 1.7376, 1.6882, 1.6685, 1.6428, 1.5830, 1.5764, 1.5666, 1.5474, 1.5290, 1.5099, 1.4890, 1.4675, 1.4052, 1.3866, 1.3755, 1.3603, 1.3414, 1.3305, 1.3223, 1.3135, 1.2454, 1.1314, 1.1130, 0.9539, 0.9471, 0.9203, 0.8811, 0.8702, 0.8588, 0.8019, 0.7387, 0.6693, 0.6537.

17.230 17.034 16.955 14.657 12.539 10.330 9.630

7.26 7.21 7.00 6.99 6.98 6.97 6.96 6.95 6.94 6.93 6.92 6.91 6.90 6.89 6.88 6.87 6.86 6.85 6.84 6.83 6.82 6.81 6.80 6.79 6.78 6.77 6.76 6.75 6.74 6.73 6.72 6.71 6.70 6.69 6.68 6.67 6.66 6.65 6.64 6.63 6.62 6.61 6.60 6.59 6.58 6.57 6.56 6.55 6.54 6.53 6.52 6.51 6.50 6.49 6.48 6.47 6.46 6.45 6.44 6.43 6.42 6.41 6.40 6.39 6.38 6.37 6.36 6.35 6.34 6.33 6.32 6.31 6.30 6.29 6.28 6.27 6.26 6.25 6.24 6.23 6.22 6.21 6.20 6.19 6.18 6.17 6.16 6.15 6.14 6.13 6.12 6.11 6.10 6.09 6.08 6.07 6.06 6.05 6.04 6.03 6.02 6.01 6.00 5.99 5.98 5.97 5.96 5.95 5.94 5.93 5.92 5.91 5.90 5.89 5.88 5.87 5.86 5.85 5.84 5.83 5.82 5.81 5.80 5.79 5.78 5.77 5.76 5.75 5.74 5.73 5.72 5.71 5.70 5.69 5.68 5.67 5.66 5.65 5.64 5.63 5.62 5.61 5.60 5.59 5.58 5.57 5.56 5.55 5.54 5.53 5.52 5.51 5.50 5.49 5.48 5.47 5.46 5.45 5.44 5.43 5.42 5.41 5.40 5.39 5.38 5.37 5.36 5.35 5.34 5.33 5.32 5.31 5.30 5.29 5.28 5.27 5.26 5.25 5.24 5.23 5.22 5.21 5.20 5.19 5.18 5.17 5.16 5.15 5.14 5.13 5.12 5.11 5.10 5.09 5.08 5.07 5.06 5.05 5.04 5.03 5.02 5.01 5.00 4.99 4.98 4.97 4.96 4.95 4.94 4.93 4.92 4.91 4.90 4.89 4.88 4.87 4.86 4.85 4.84 4.83 4.82 4.81 4.80 4.79 4.78 4.77 4.76 4.75 4.74 4.73 4.72 4.71 4.70 4.69 4.68 4.67 4.66 4.65 4.64 4.63 4.62 4.61 4.60 4.59 4.58 4.57 4.56 4.55 4.54 4.53 4.52 4.51 4.50 4.49 4.48 4.47 4.46 4.45 4.44 4.43 4.42 4.41 4.40 4.39 4.38 4.37 4.36 4.35 4.34 4.33 4.32 4.31 4.30 4.29 4.28 4.27 4.26 4.25 4.24 4.23 4.22 4.21 4.20 4.19 4.18 4.17 4.16 4.15 4.14 4.13 4.12 4.11 4.10 4.09 4.08 4.07 4.06 4.05 4.04 4.03 4.02 4.01 4.00 3.99 3.98 3.97 3.96 3.95 3.94 3.93 3.92 3.91 3.90 3.89 3.88 3.87 3.86 3.85 3.84 3.83 3.82 3.81 3.80 3.79 3.78 3.77 3.76 3.75 3.74 3.73 3.72 3.71 3.70 3.69 3.68 3.67 3.66 3.65 3.64 3.63 3.62 3.61 3.60 3.59 3.58 3.57 3.56 3.55 3.54 3.53 3.52 3.51 3.50 3.49 3.48 3.47 3.46 3.45 3.44 3.43 3.42 3.41 3.40 3.39 3.38 3.37 3.36 3.35 3.34 3.33 3.32 3.31 3.30 3.29 3.28 3.27 3.26 3.25 3.24 3.23 3.22 3.21 3.20 3.19 3.18 3.17 3.16 3.15 3.14 3.13 3.12 3.11 3.10 3.09 3.08 3.07 3.06 3.05 3.04 3.03 3.02 3.01 3.00 2.99 2.98 2.97 2.96 2.95 2.94 2.93 2.92 2.91 2.90 2.89 2.88 2.87 2.86 2.85 2.84 2.83 2.82 2.81 2.80 2.79 2.78 2.77 2.76 2.75 2.74 2.73 2.72 2.71 2.70 2.69 2.68 2.67 2.66 2.65 2.64 2.63 2.62 2.61 2.60 2.59 2.58 2.57 2.56 2.55 2.54 2.53 2.52 2.51 2.50 2.49 2.48 2.47 2.46 2.45 2.44 2.43 2.42 2.41 2.40 2.39 2.38 2.37 2.36 2.35 2.34 2.33 2.32 2.31 2.30 2.29 2.28 2.27 2.26 2.25 2.24 2.23 2.22 2.21 2.20 2.19 2.18 2.17 2.16 2.15 2.14 2.13 2.12 2.11 2.10 2.09 2.08 2.07 2.06 2.05 2.04 2.03 2.02 2.01 2.00 1.99 1.98 1.97 1.96 1.95 1.94 1.93 1.92 1.91 1.90 1.89 1.88 1.87 1.86 1.85 1.84 1.83 1.82 1.81 1.80 1.79 1.78 1.77 1.76 1.75 1.74 1.73 1.72 1.71 1.70 1.69 1.68 1.67 1.66 1.65 1.64 1.63 1.62 1.61 1.60 1.59 1.58 1.57 1.56 1.55 1.54 1.53 1.52 1.51 1.50 1.49 1.48 1.47 1.46 1.45 1.44 1.43 1.42 1.41 1.40 1.39 1.38 1.37 1.36 1.35 1.34 1.33 1.32 1.31 1.30 1.29 1.28 1.27 1.26 1.25 1.24 1.23 1.22 1.21 1.20 1.19 1.18 1.17 1.16 1.15 1.14 1.13 1.12 1.11 1.10 1.09 1.08 1.07 1.06 1.05 1.04 1.03 1.02 1.01 1.00 0.99 0.98 0.97 0.96 0.95 0.94 0.93 0.92 0.91 0.90 0.89 0.88 0.87 0.86 0.85 0.84 0.83 0.82 0.81 0.80 0.79 0.78 0.77 0.76 0.75 0.74 0.73 0.72 0.71 0.70 0.69 0.68 0.67 0.66 0.65 0.64 0.63 0.62 0.61 0.60 0.59 0.58 0.57 0.56 0.55 0.54 0.53 0.52 0.51 0.50 0.49 0.48 0.47 0.46 0.45 0.44 0.43 0.42 0.41 0.40 0.39 0.38 0.37 0.36 0.35 0.34 0.33 0.32 0.31 0.30 0.29 0.28 0.27 0.26 0.25 0.24 0.23 0.22 0.21 0.20 0.19 0.18 0.17 0.16 0.15 0.14 0.13 0.12 0.11 0.10 0.09 0.08 0.07 0.06 0.05 0.04 0.03 0.02 0.01 0.00

NAME CY2-98  
EXPNO 2  
PROCNO 1  
Date\_ 20181013  
Time 10.30  
INSTRUM spect  
PROBHD 5 mm CPTCI 1H-  
PULPROG zgpg30  
TD 65536  
SOLVENT CDCl3  
NS 8192  
DS 4  
SWH 36057.691 H

## MALDI-TOF of compound **64**

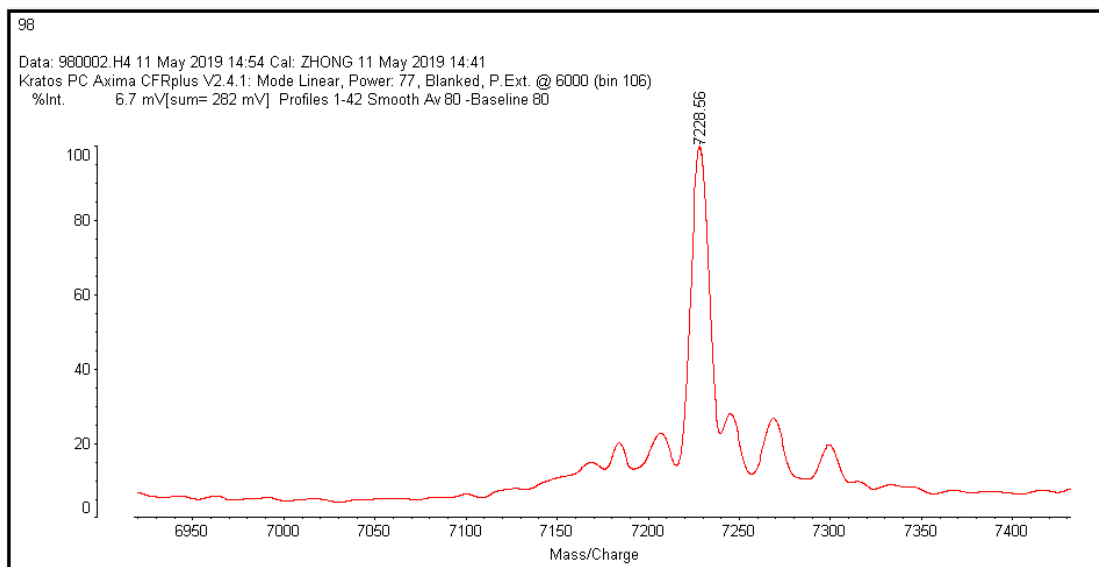

## $^1\text{H}$ NMR of compound **65**

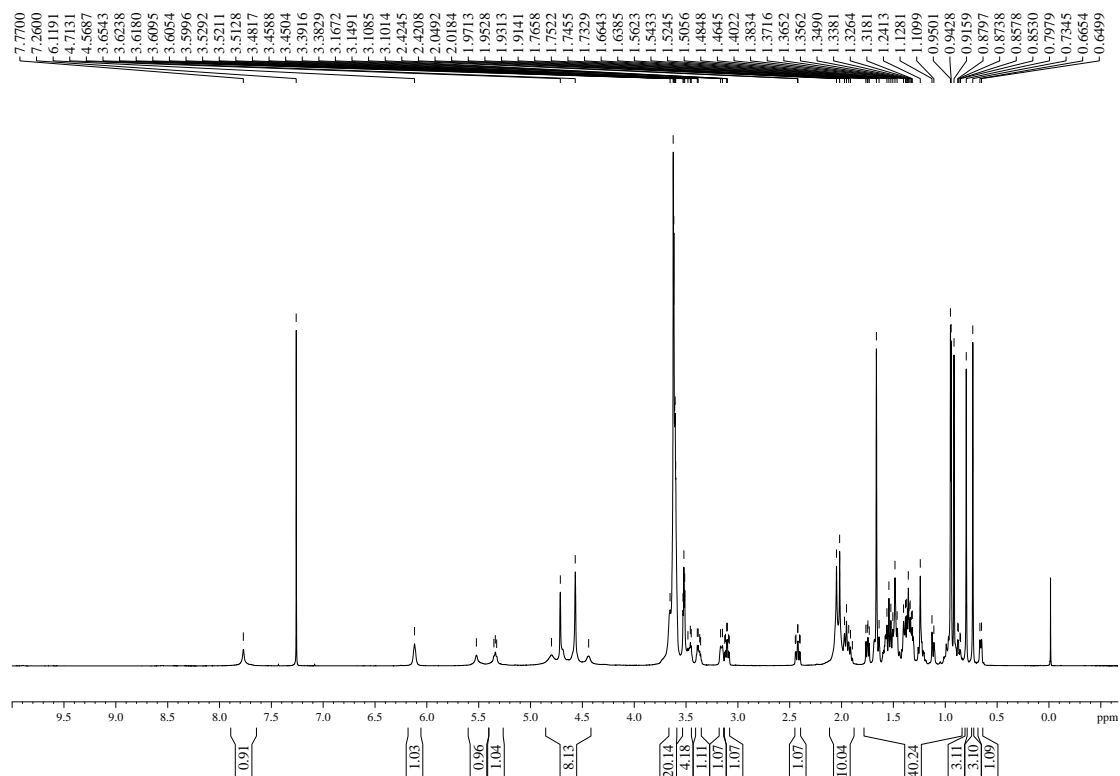

### <sup>13</sup>C NMR of compound **65**

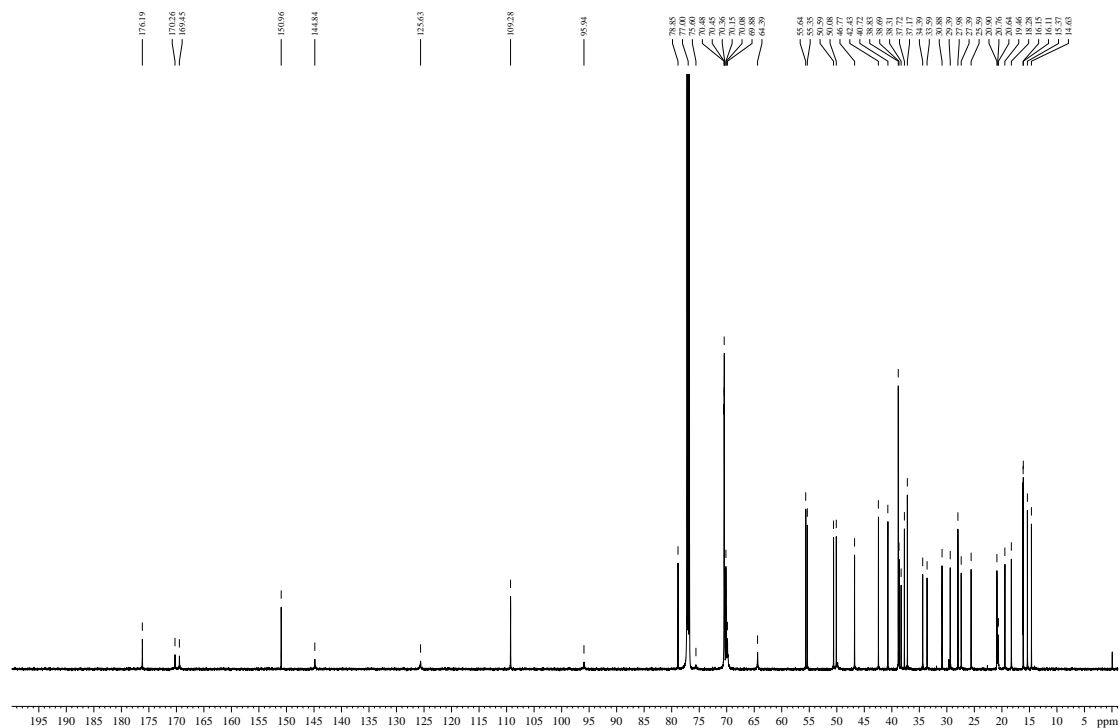

### MALDI-TOF of compound **65**

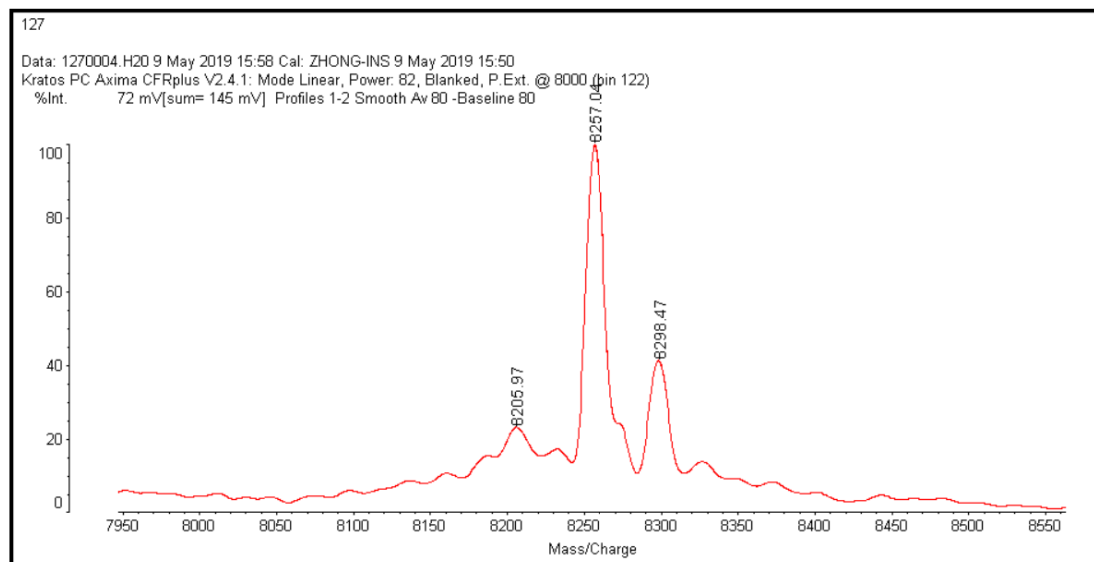

# <sup>1</sup>H NMR of compound 66

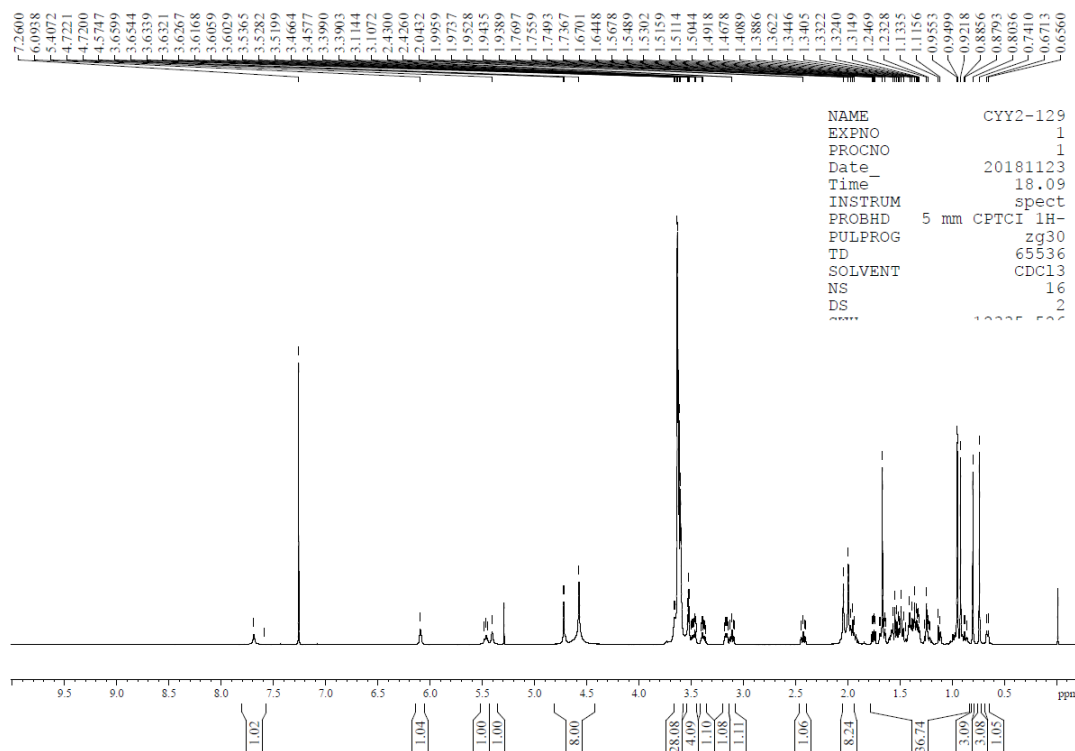

# <sup>13</sup>C NMR of compound 66

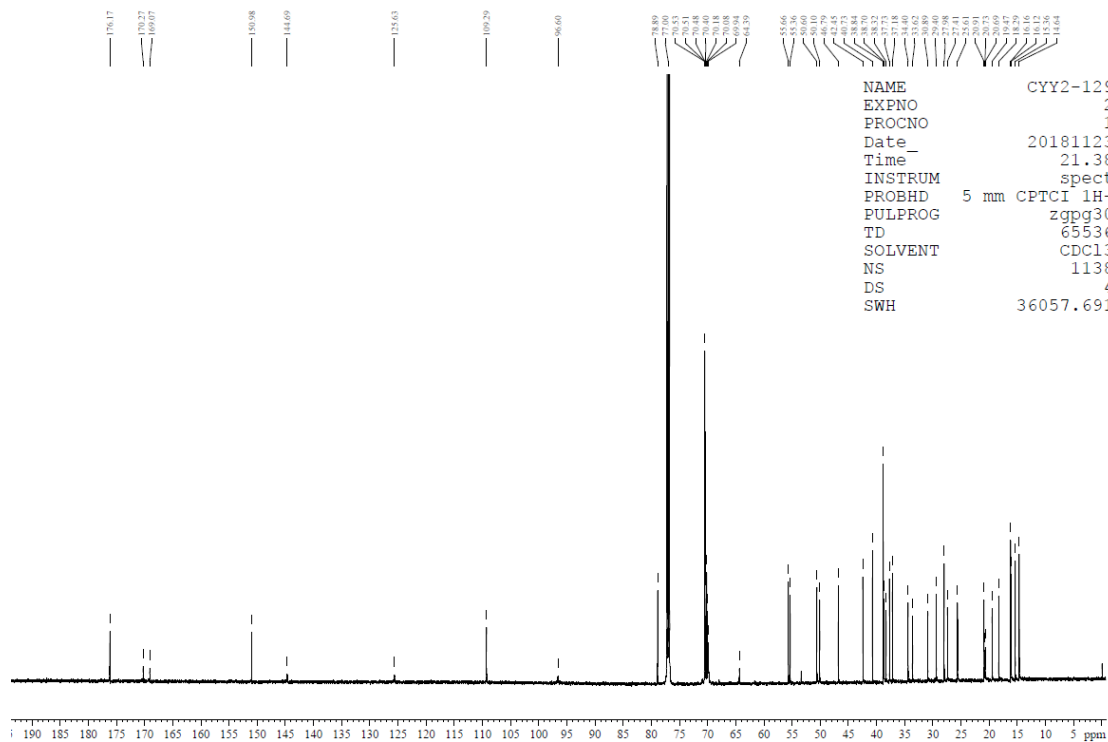

## HRMS of compound **66**

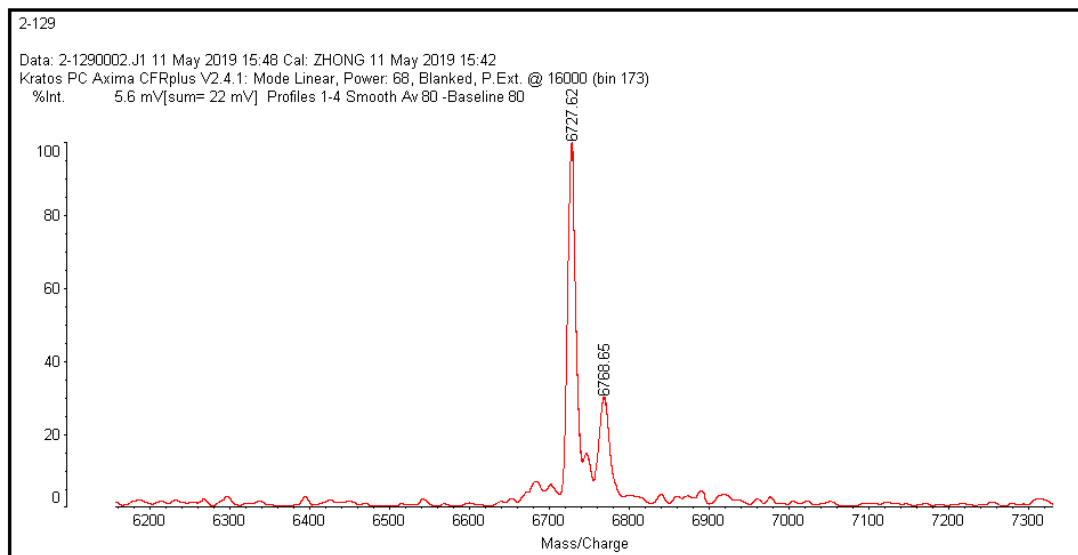

## $^1\text{H}$ NMR of compound **67**

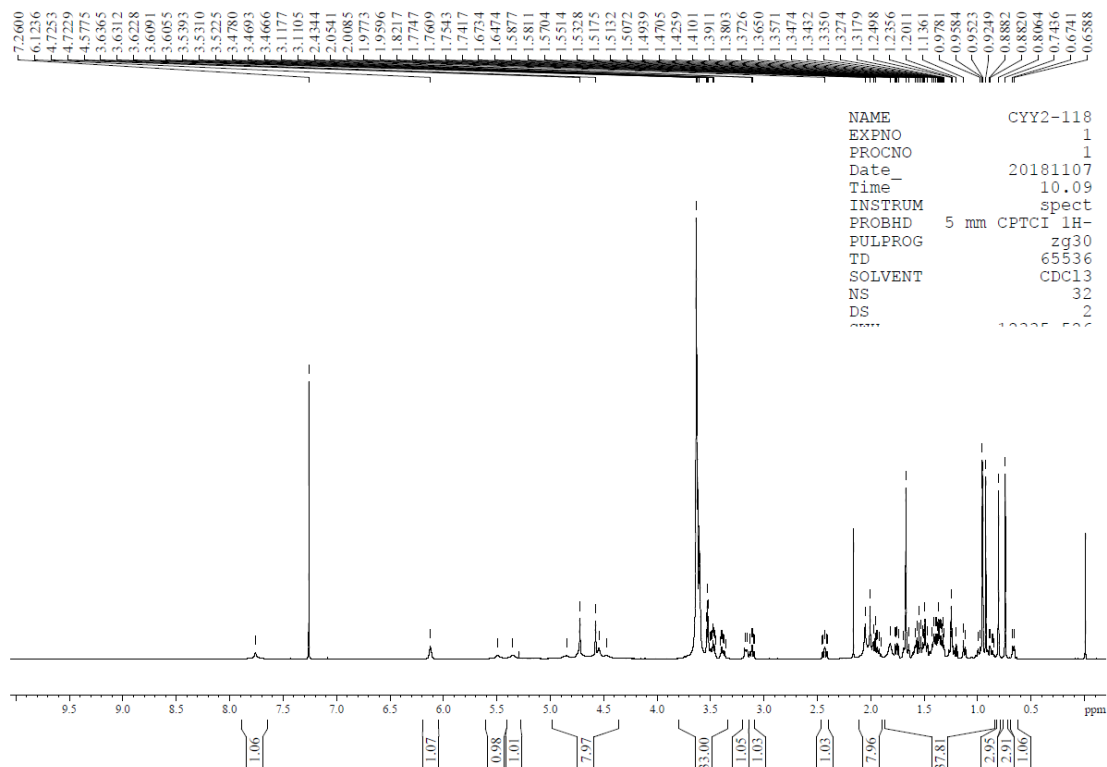

# <sup>13</sup>C NMR of compound **67**

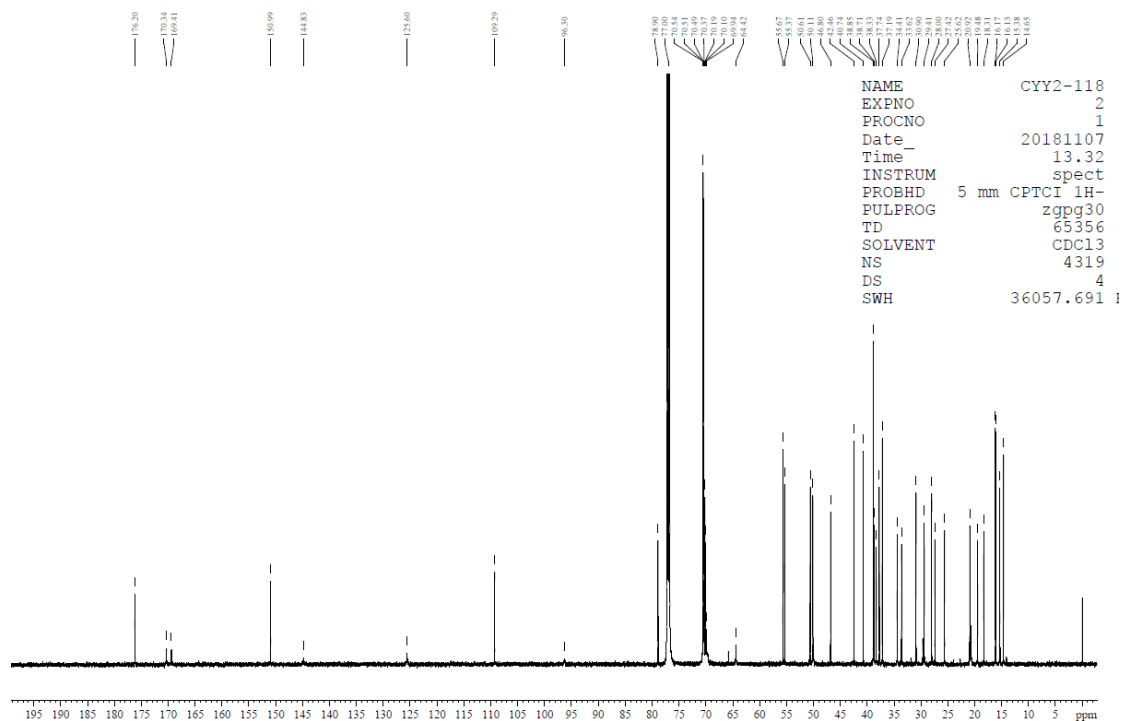

# HRMS of compound **67**

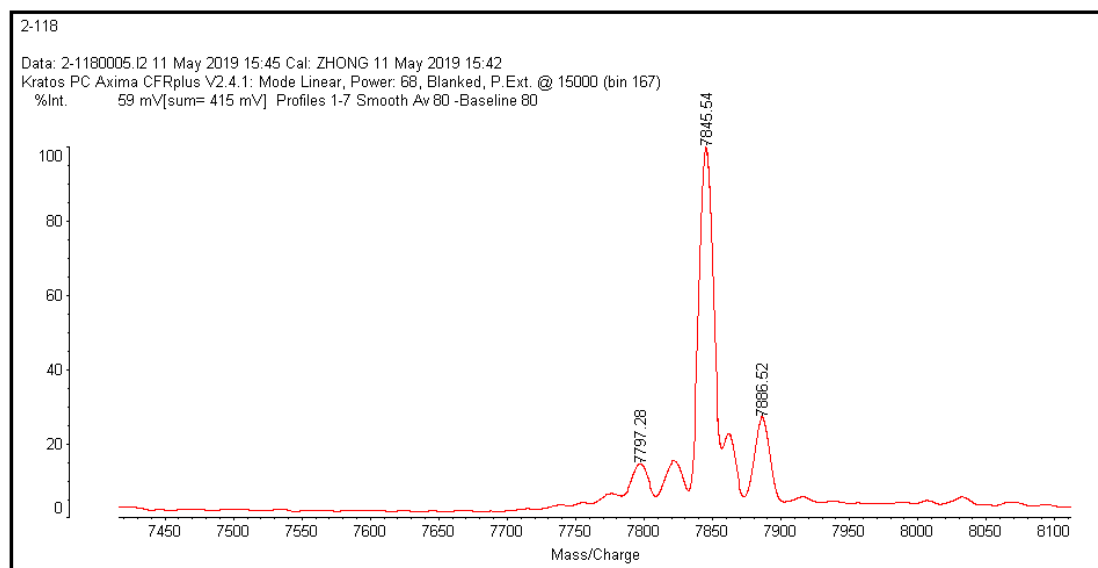

# <sup>1</sup>H NMR of compound 68

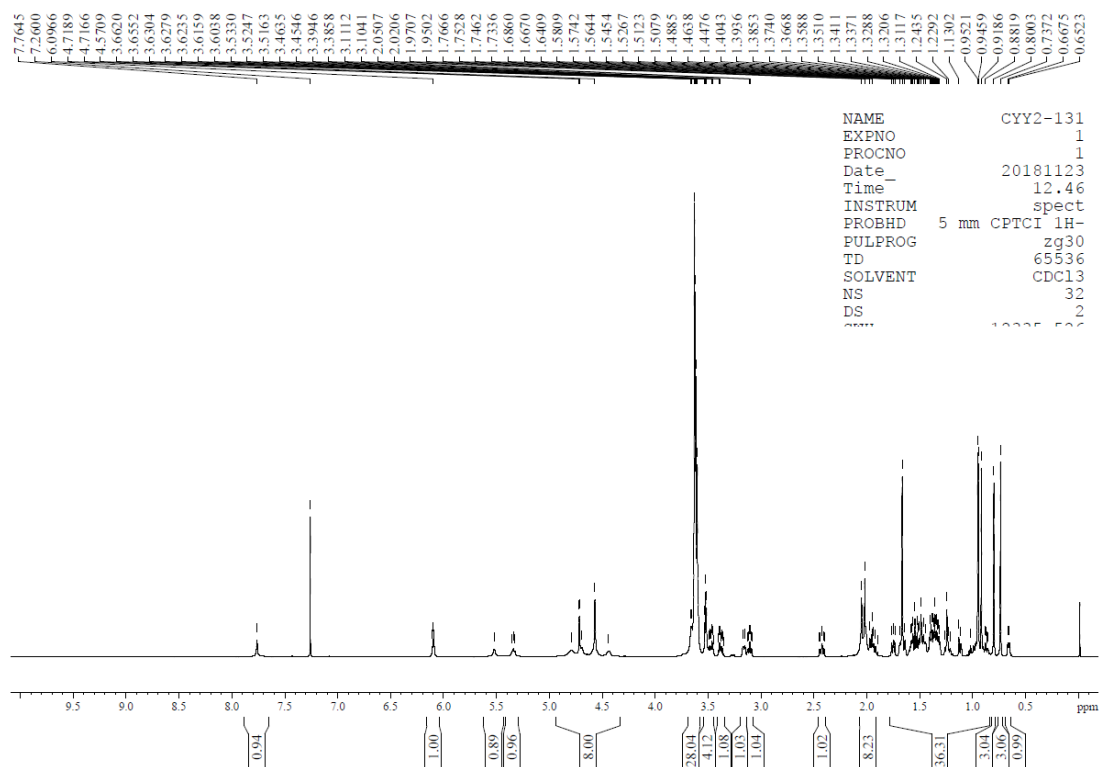

# <sup>13</sup>C NMR of compound 68

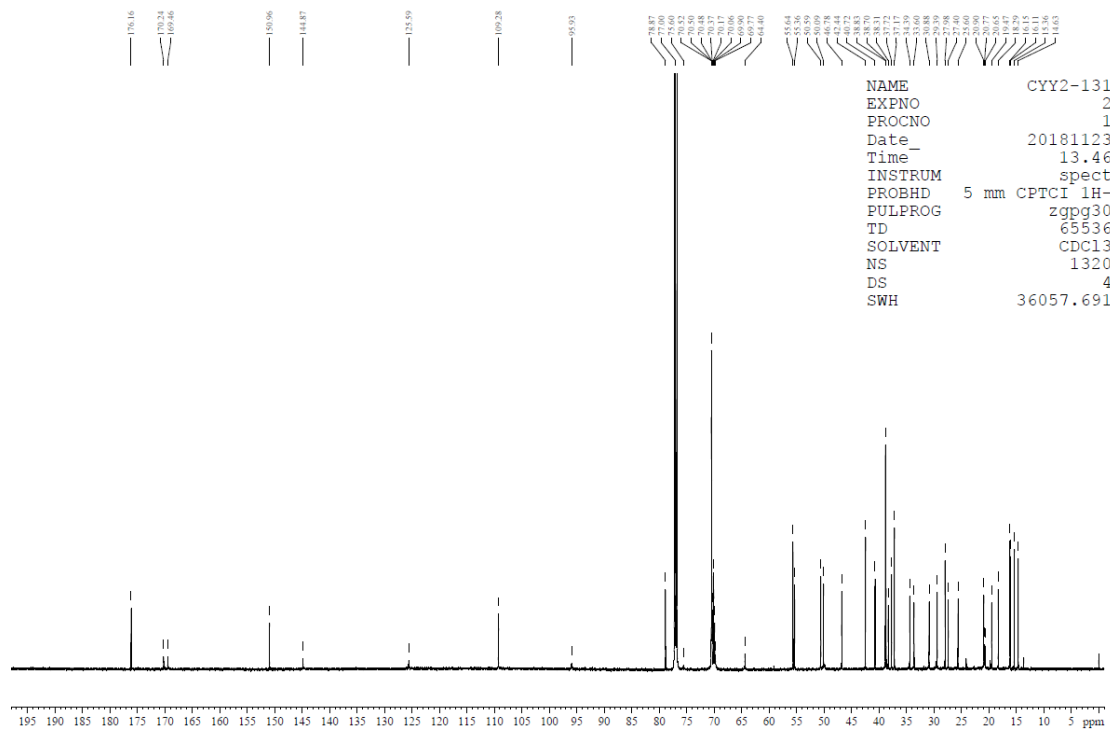

## HRMS of compound **69**

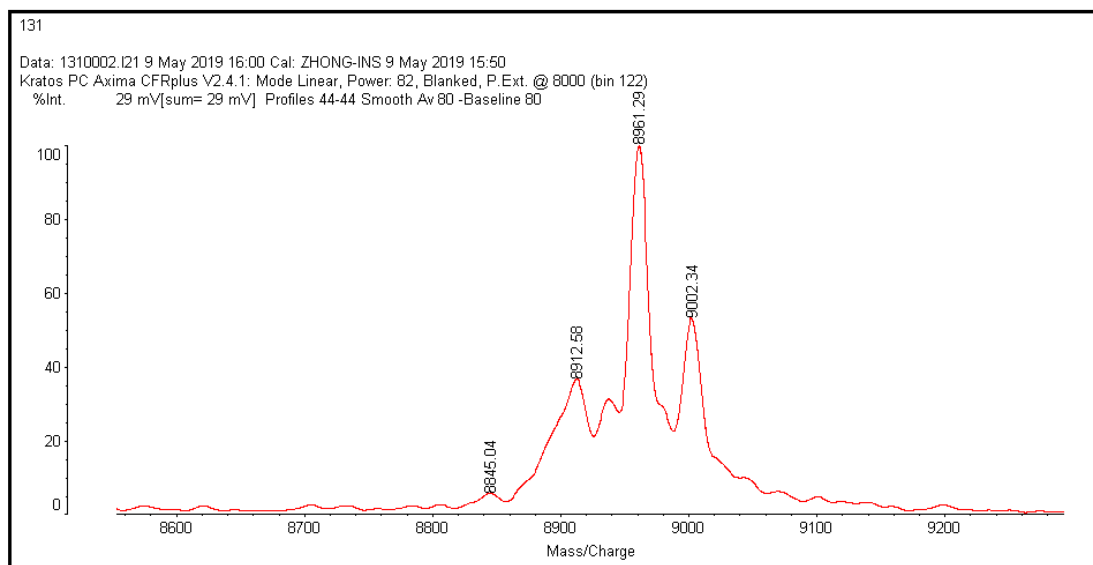

## $^1\text{H}$ NMR of compound **69**

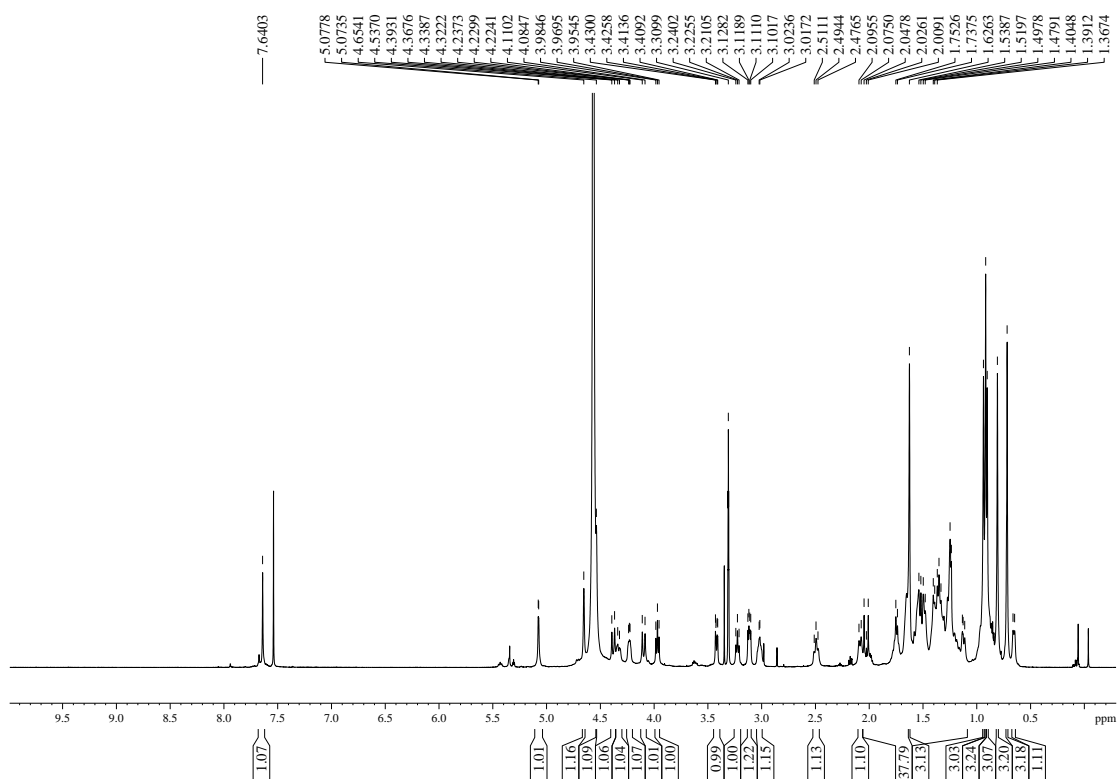

# <sup>13</sup>C NMR of compound **69**

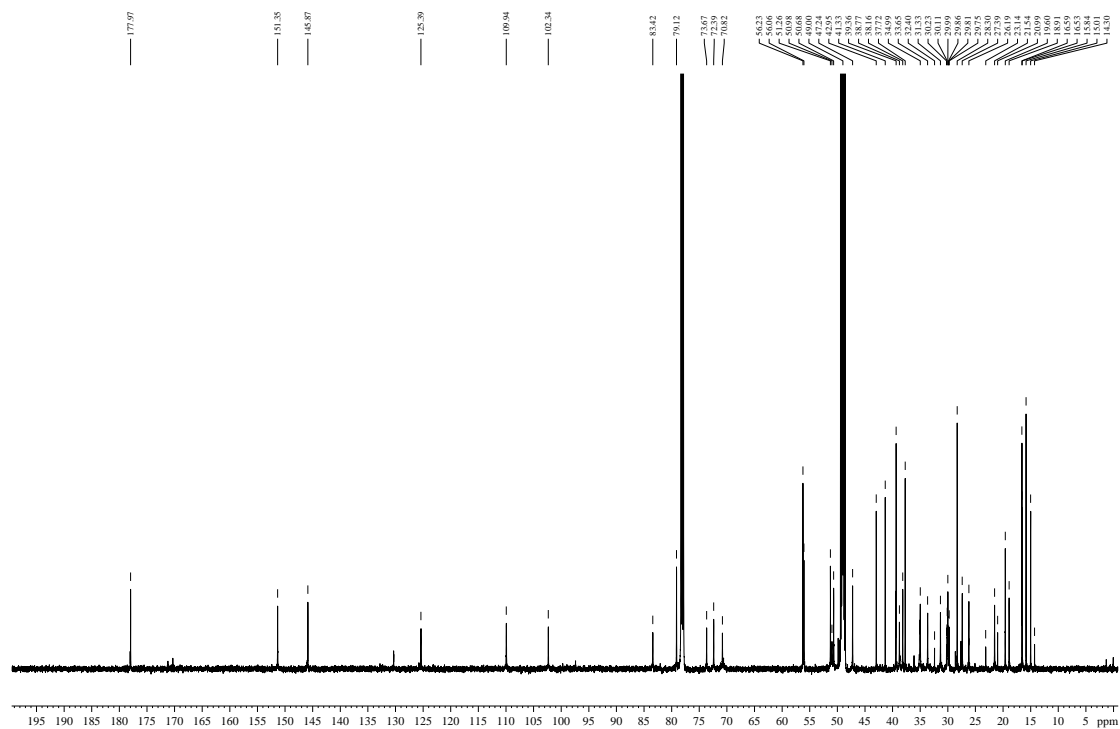

# MALDI-TOF of compound **69**

TOF/TOF™ Reflector Spec #1 MC[BP = 4108.1, 108]

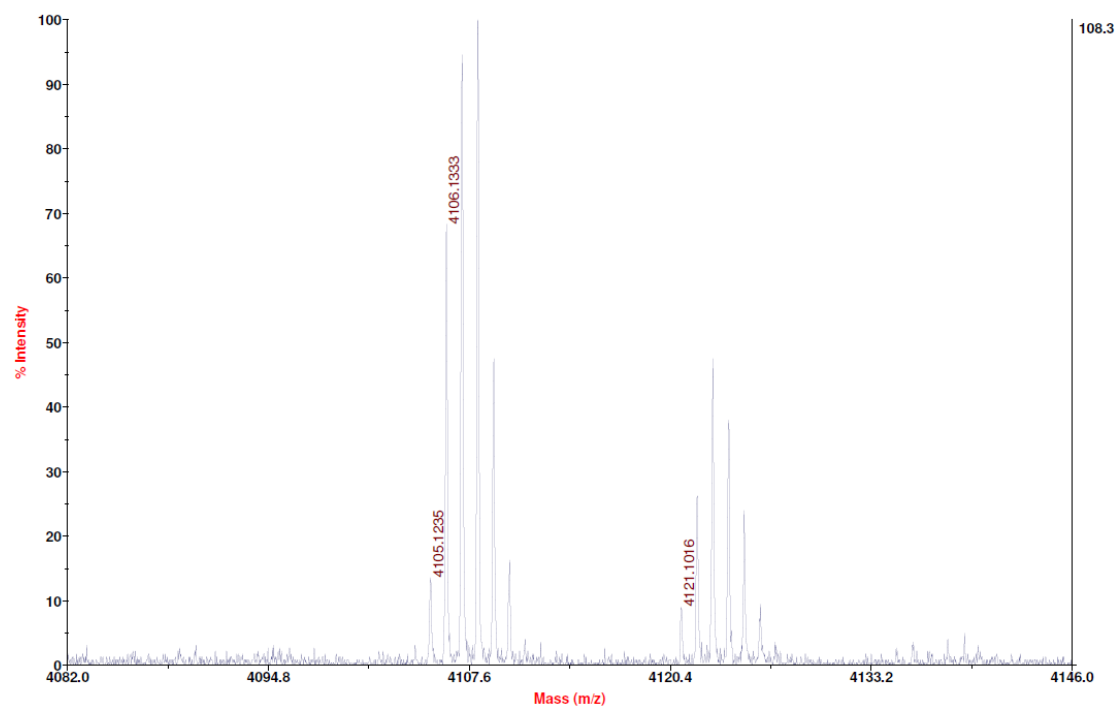

# <sup>1</sup>H NMR of compound **70**

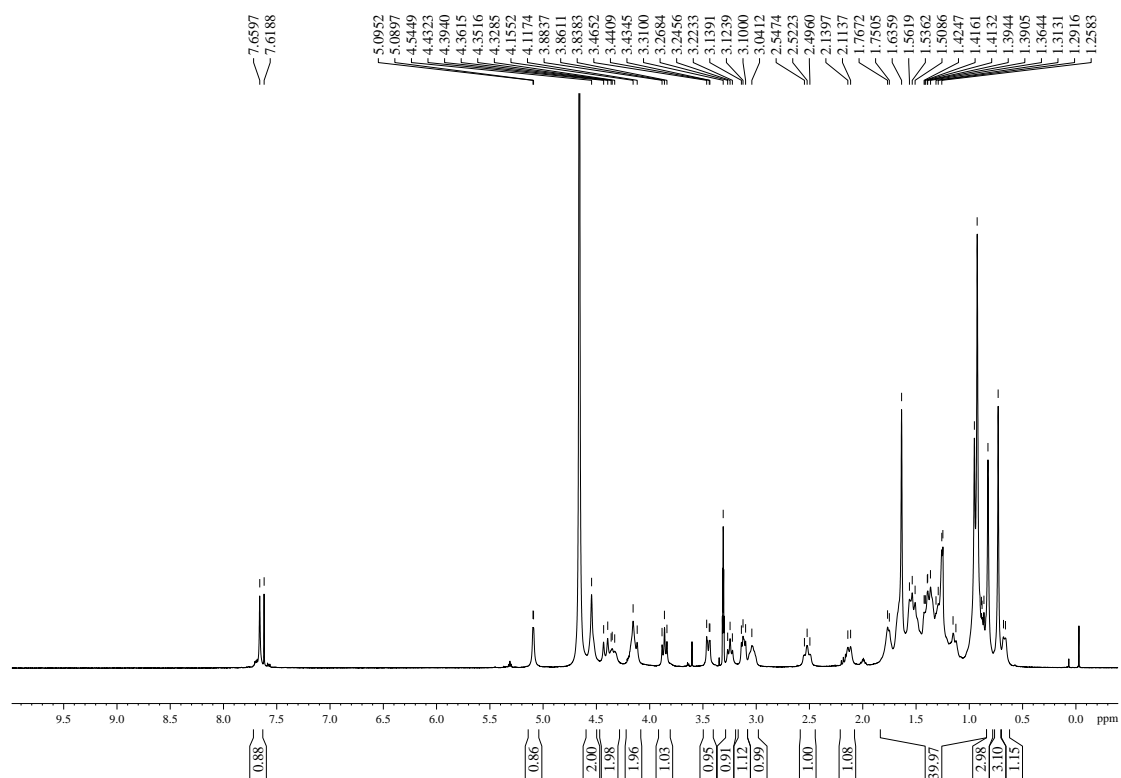

# <sup>13</sup>C NMR of compound **70**

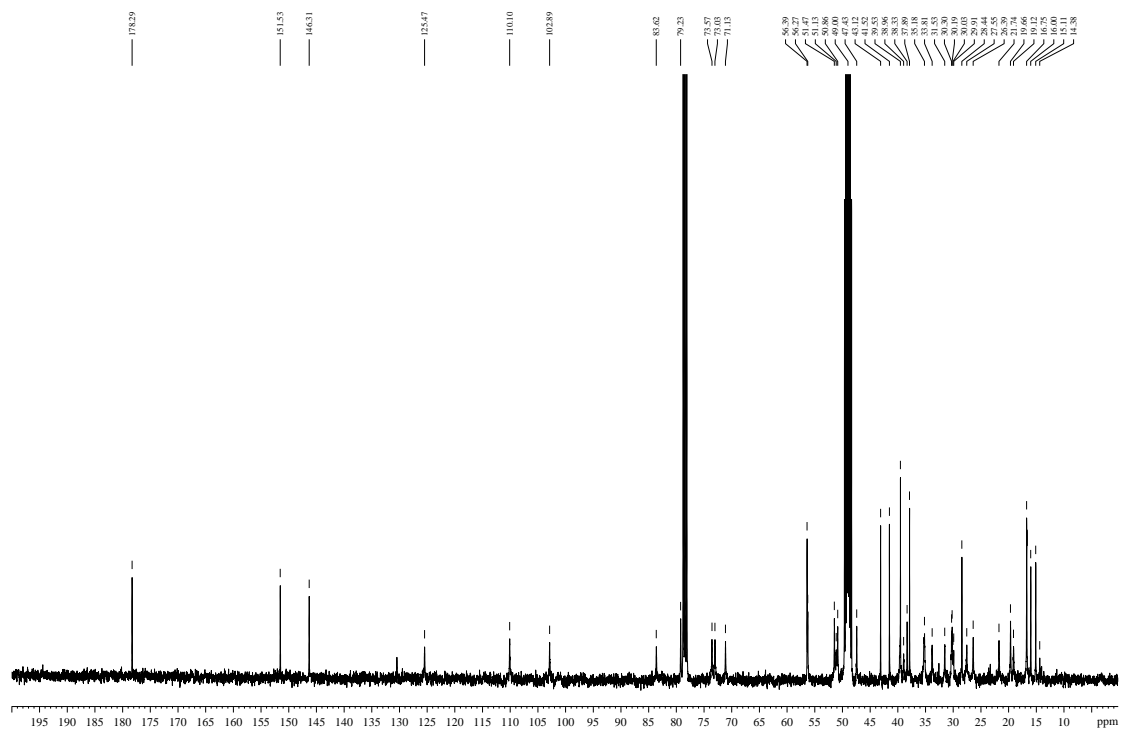

# MALDI-TOF of compound **70**

TOF/TOF™ Reflector Spec #1 MC[BP = 1081.9, 307]

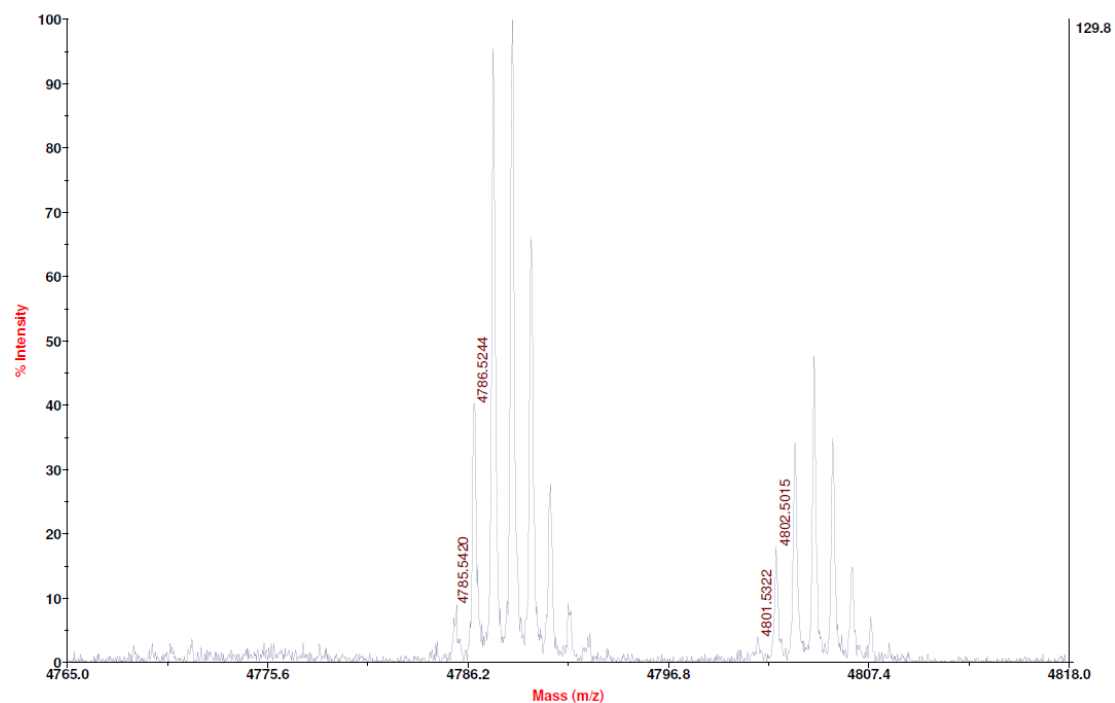

# <sup>1</sup>H NMR of compound **71**

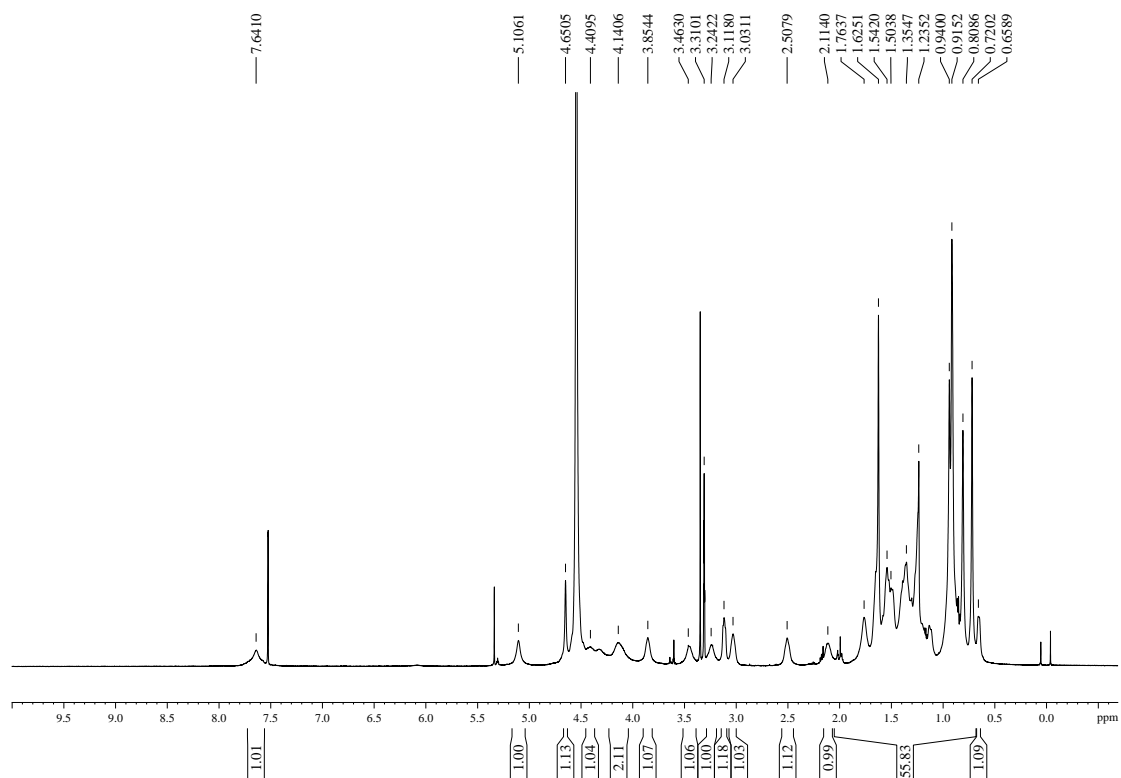

# <sup>13</sup>C NMR of compound **71**

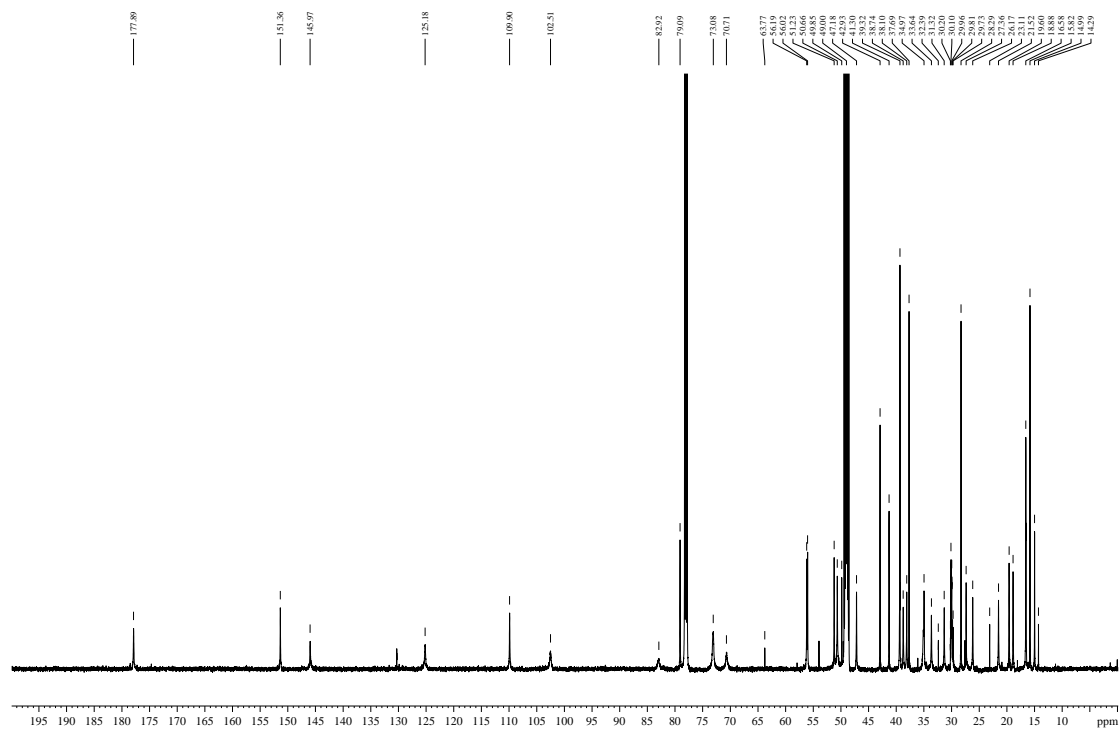

# MALDI-TOF of compound **71**

TOF/TOF™ Reflector Spec #1 MC[BP = 1081.9, 216]

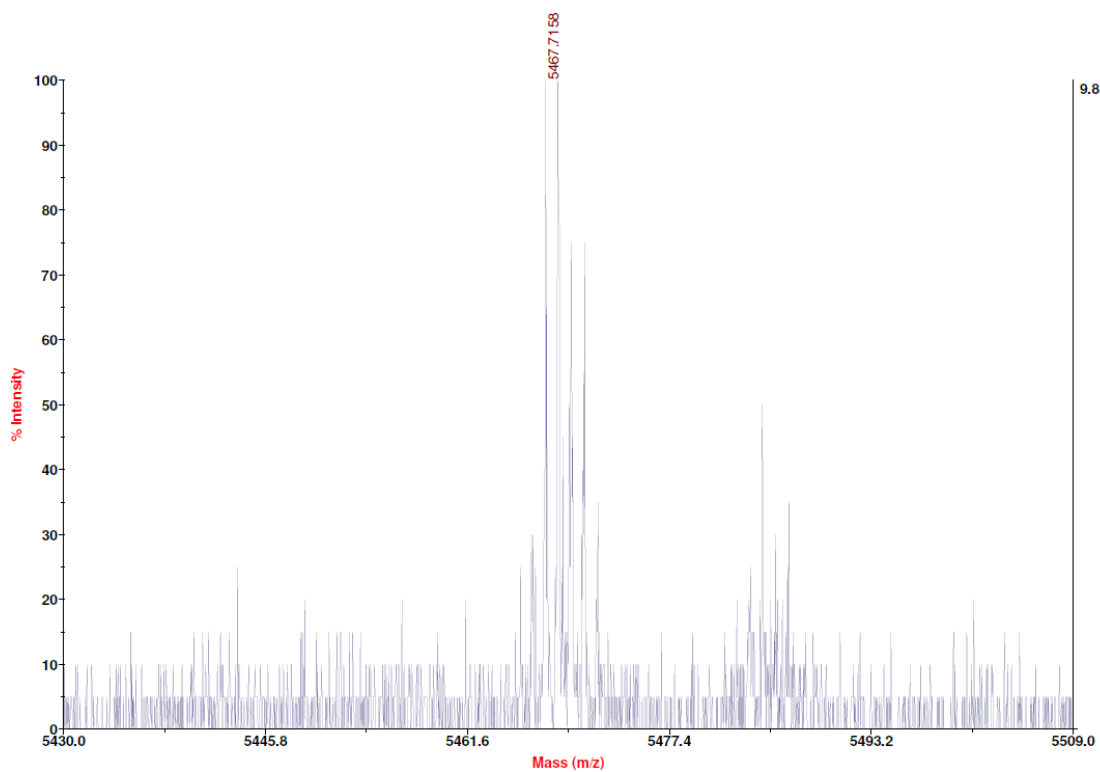

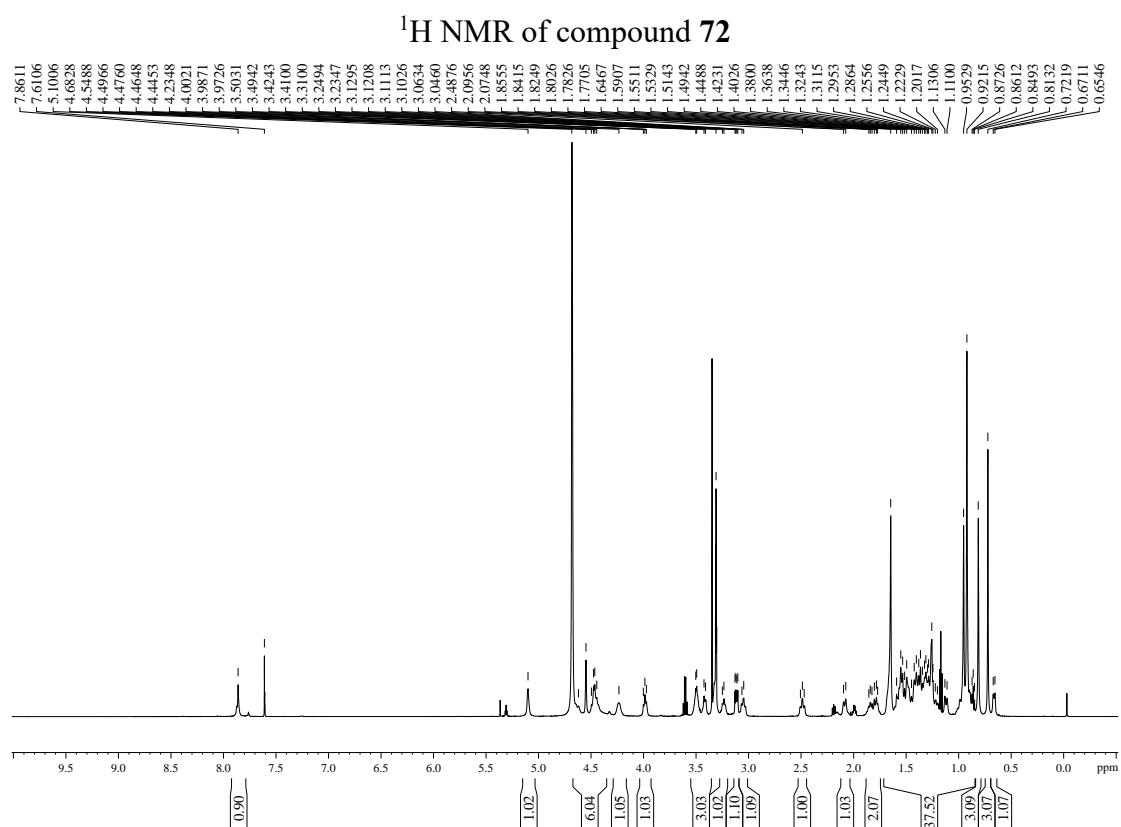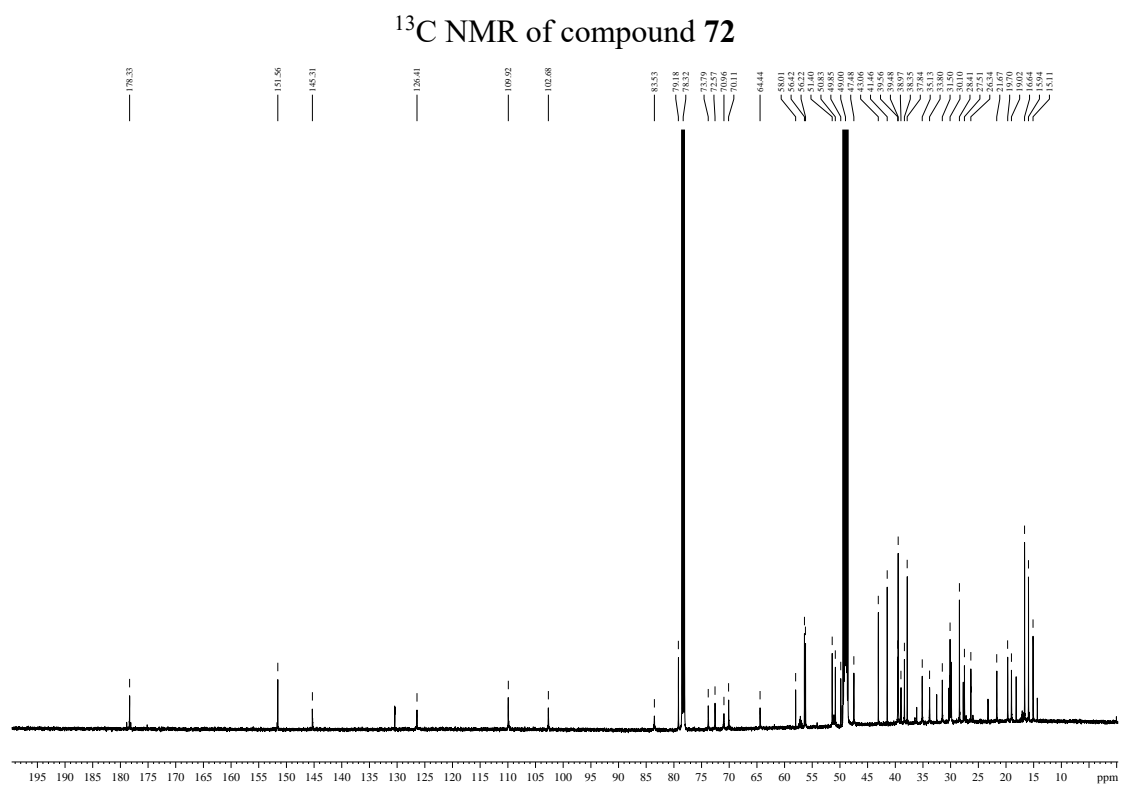

## MALDI-TOF of compound **72**

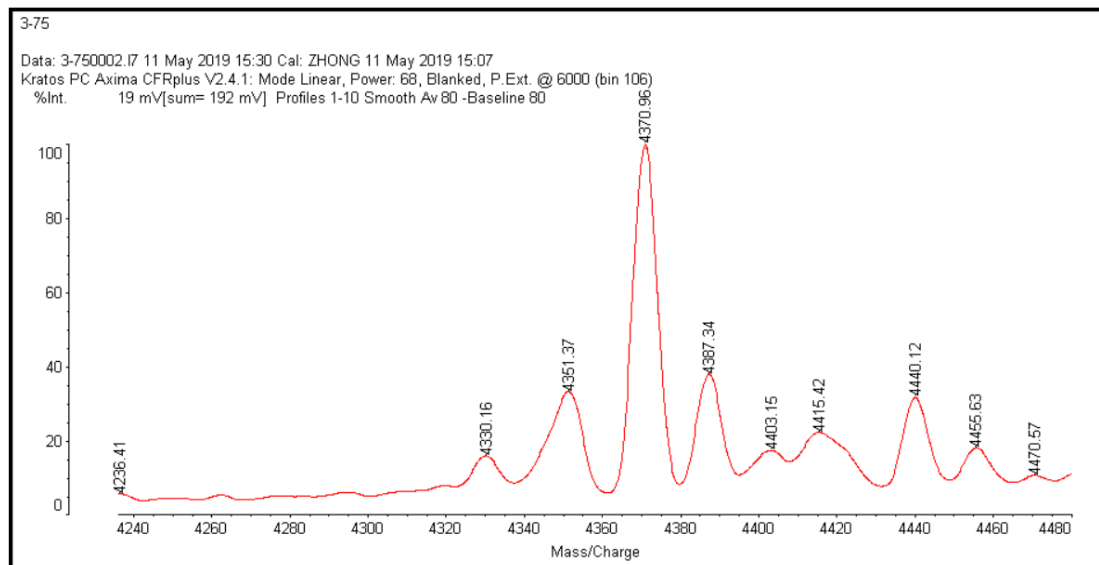

## $^1\text{H}$ NMR of compound **73**

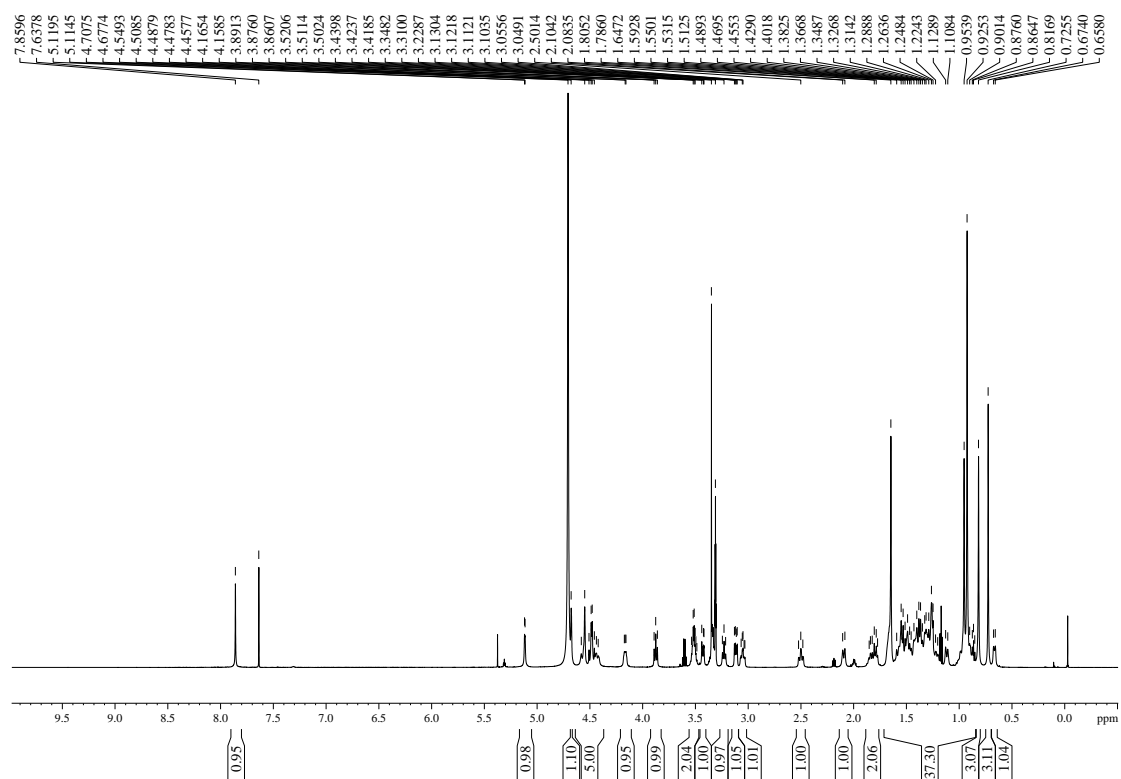

### $^{13}\text{C}$ NMR of compound **73**

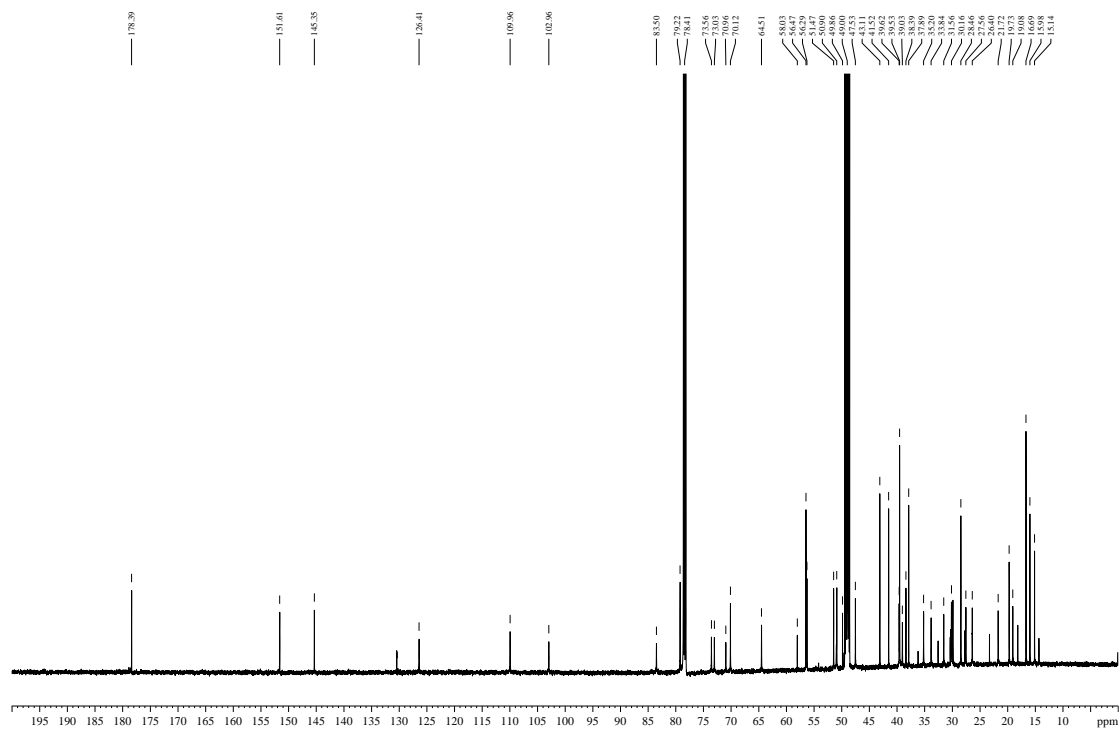

### MALDI-TOF of compound **73**

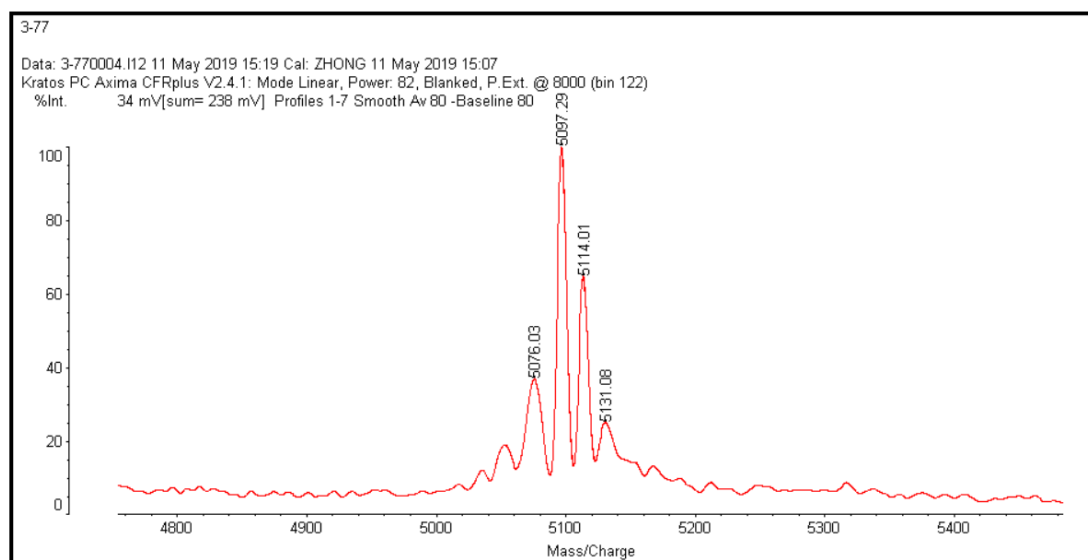

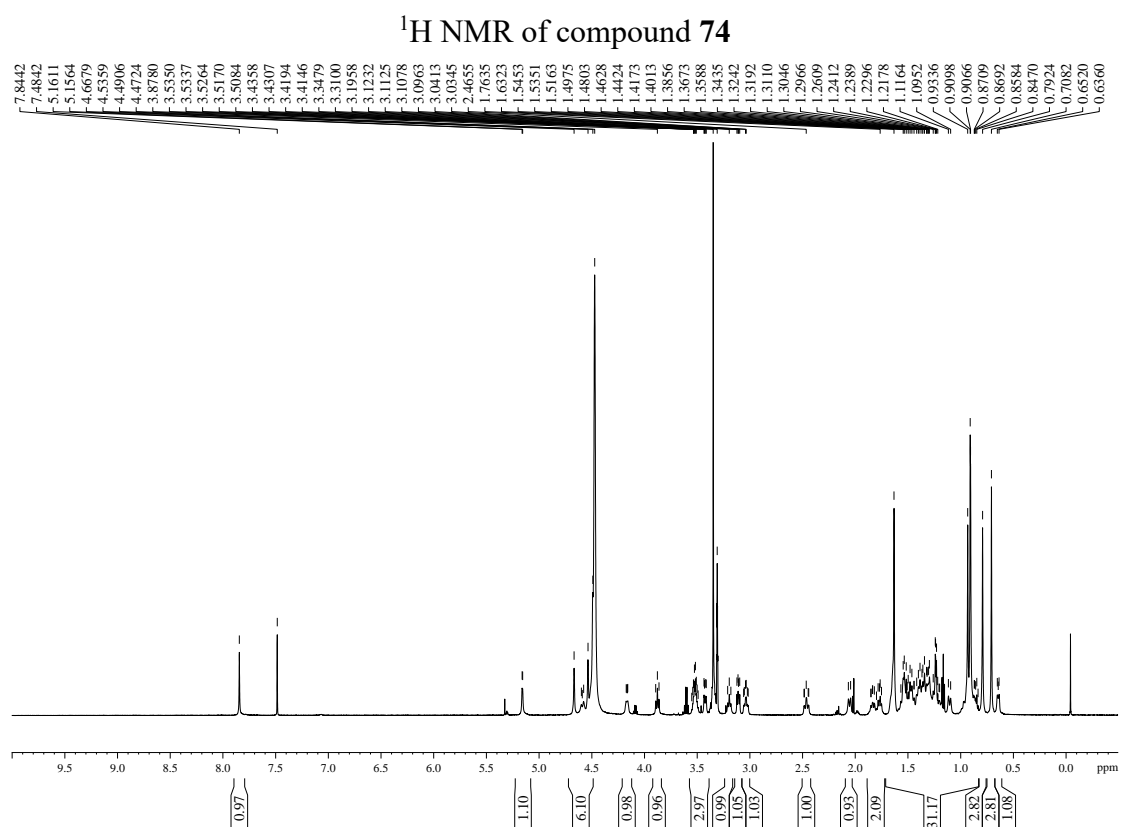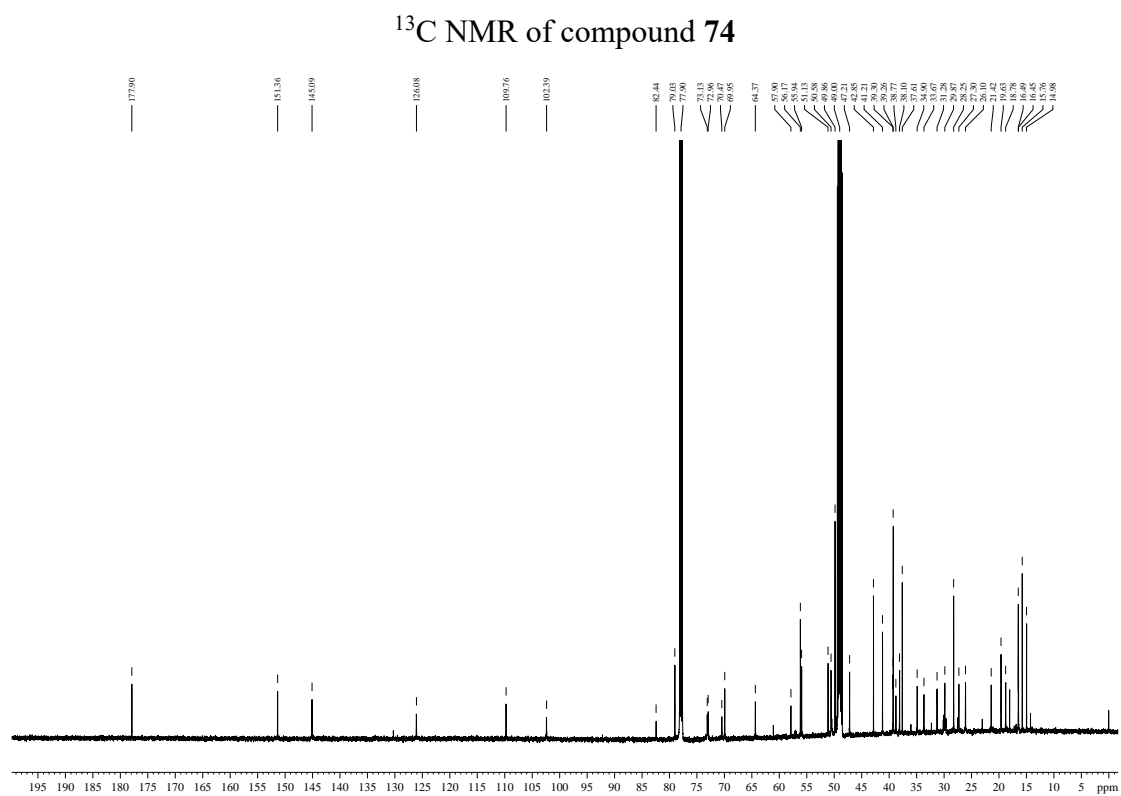

# MALDI-TOF of compound **74**

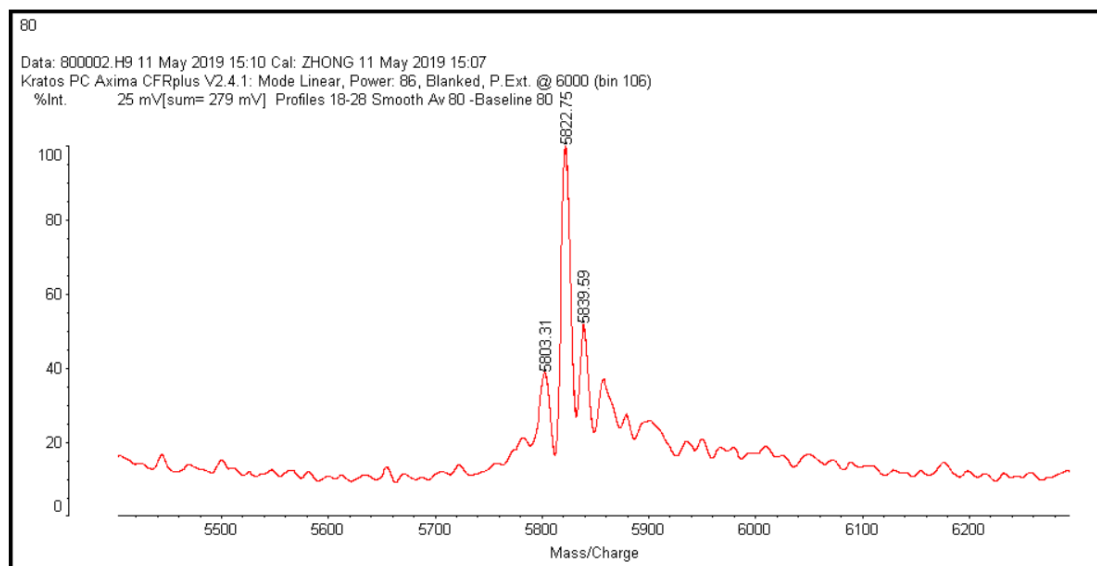

# <sup>1</sup>H NMR of compound **75**

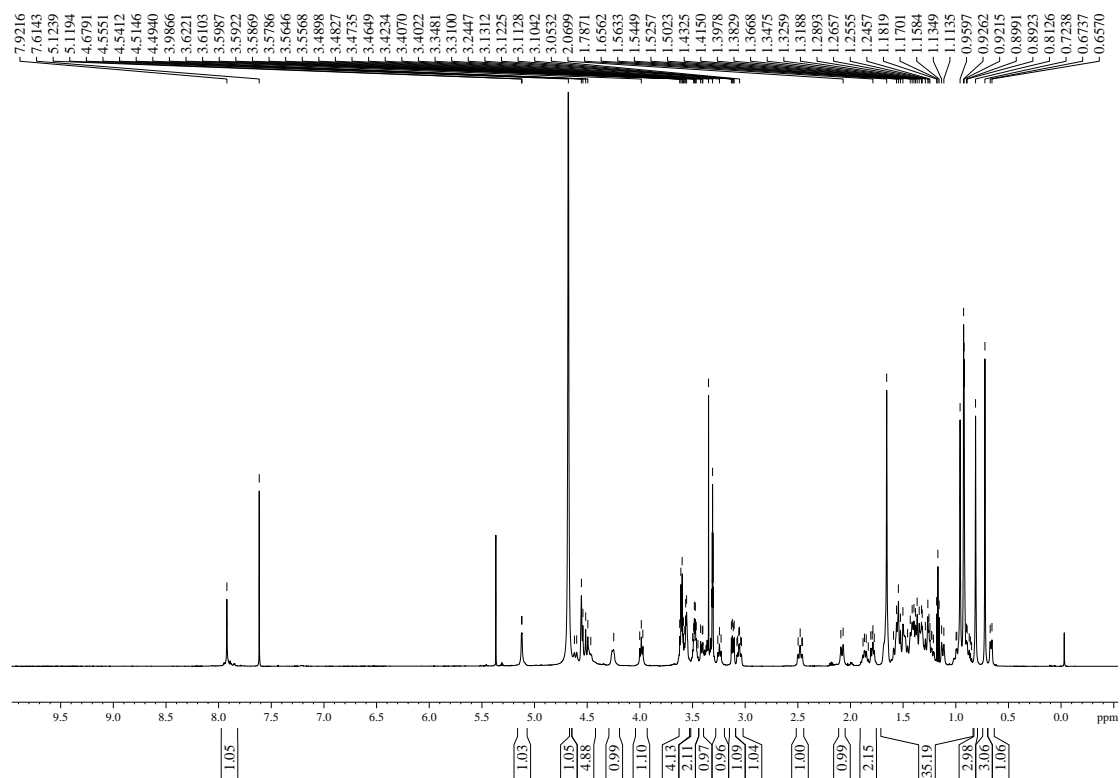

# <sup>13</sup>C NMR of compound **75**

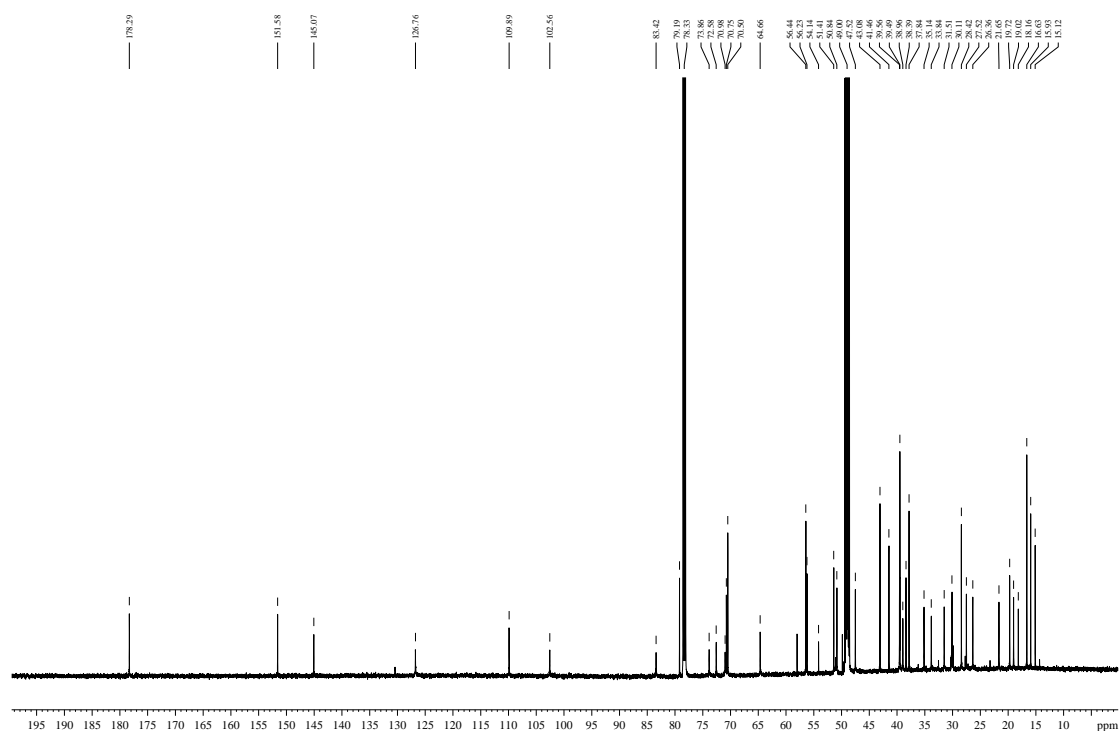

# MALDI-TOF of compound **75**

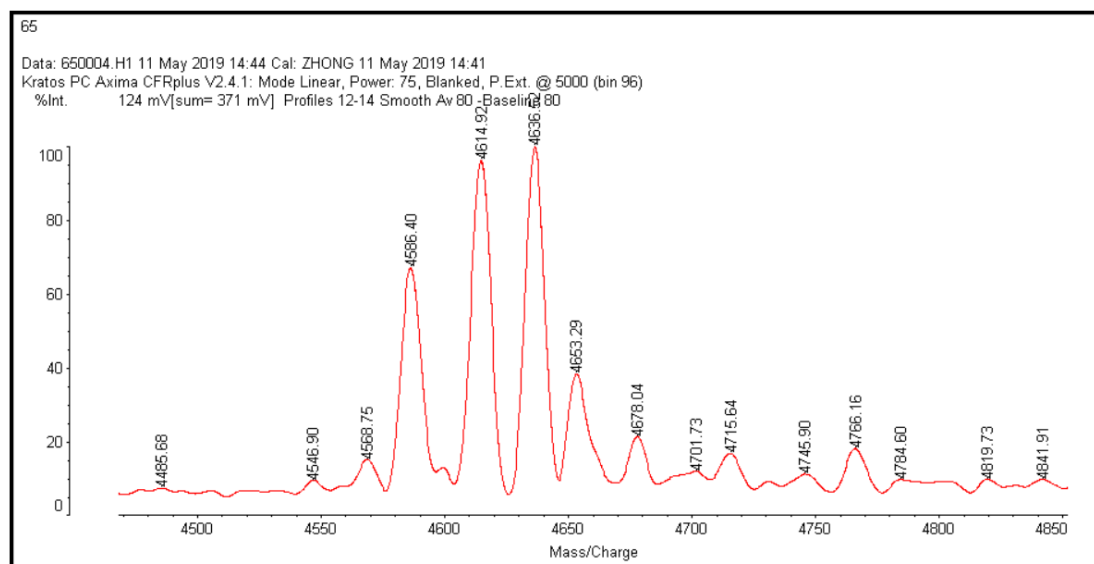

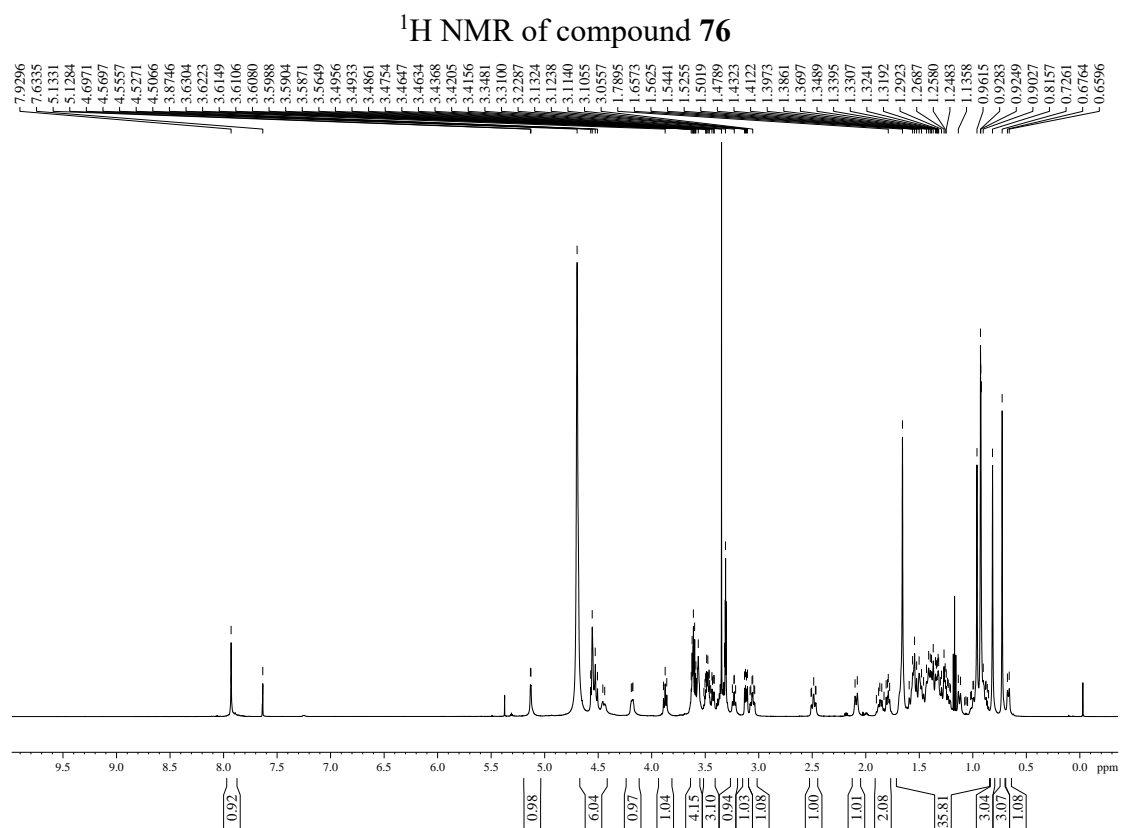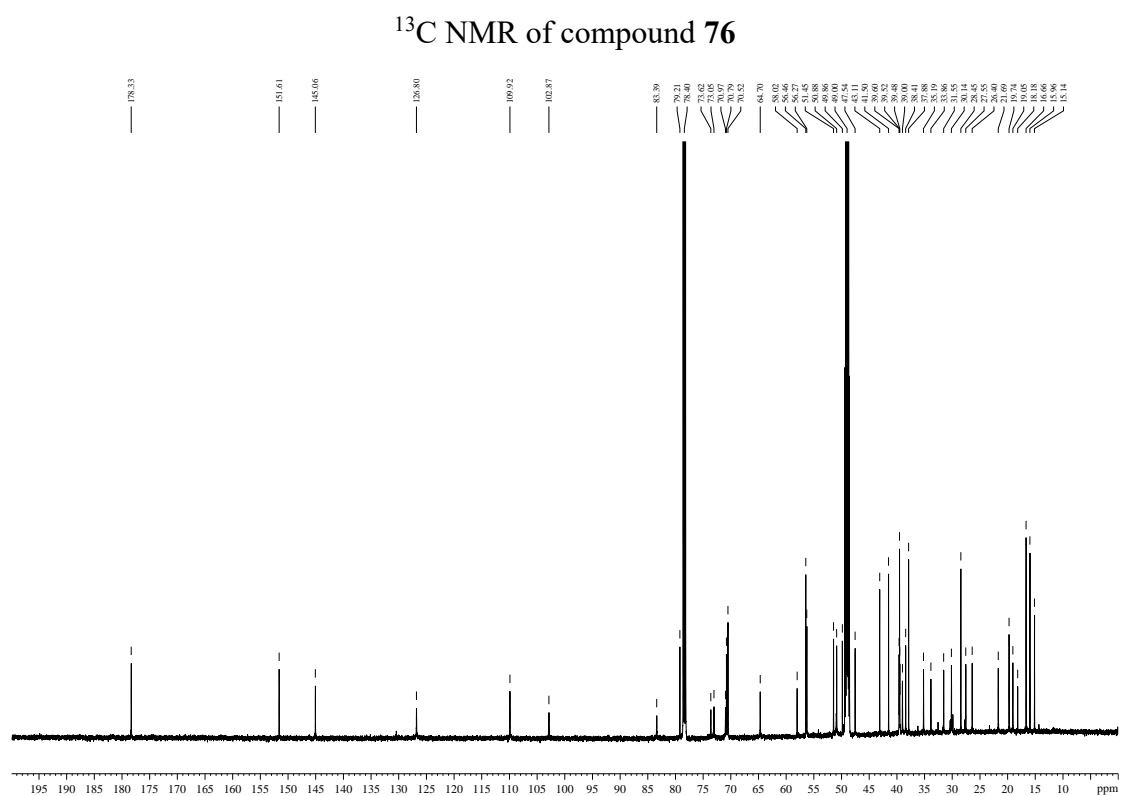

# MALDI-TOF of compound 76

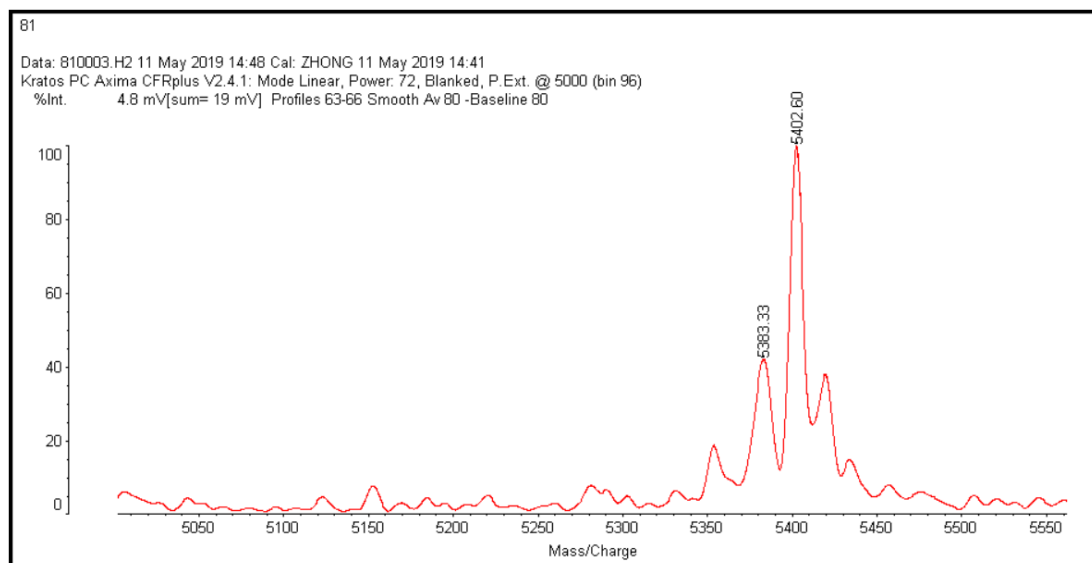

# <sup>1</sup>H NMR of compound 77

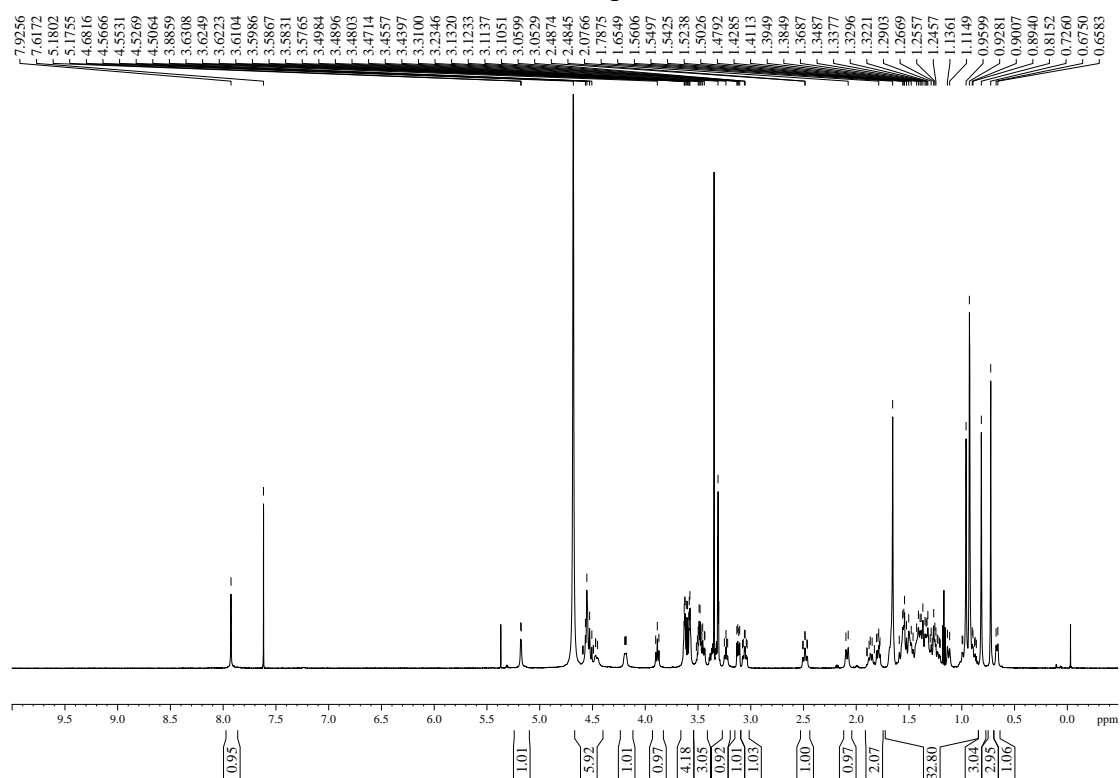

# <sup>13</sup>C NMR of compound 77

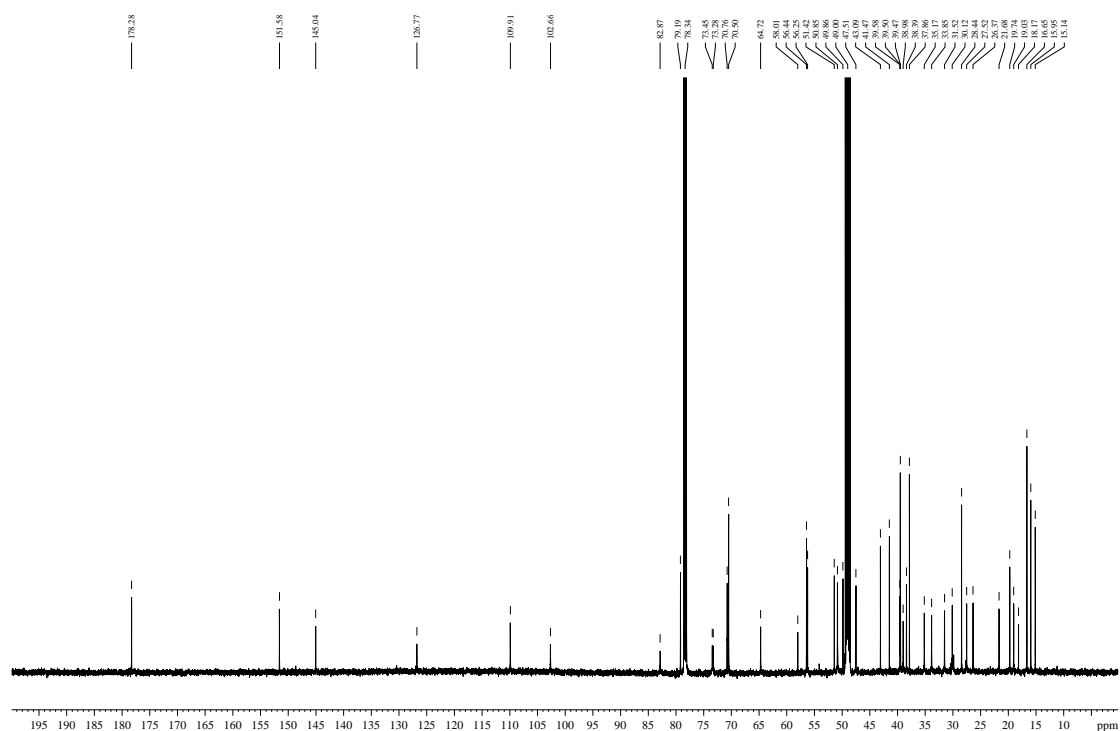

# MALDI-TOF of compound 77

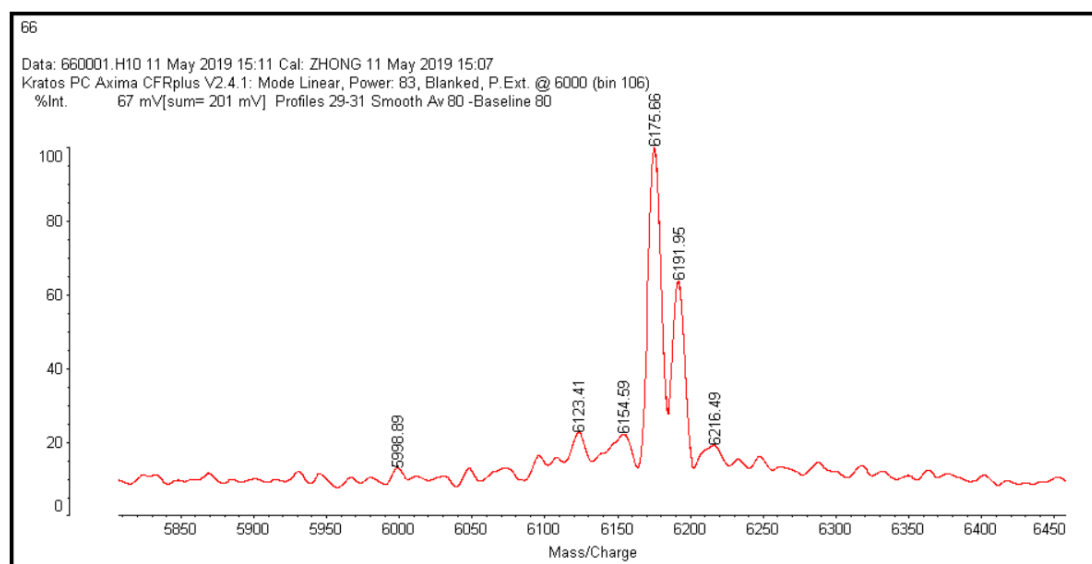

# <sup>1</sup>H NMR of compound 78

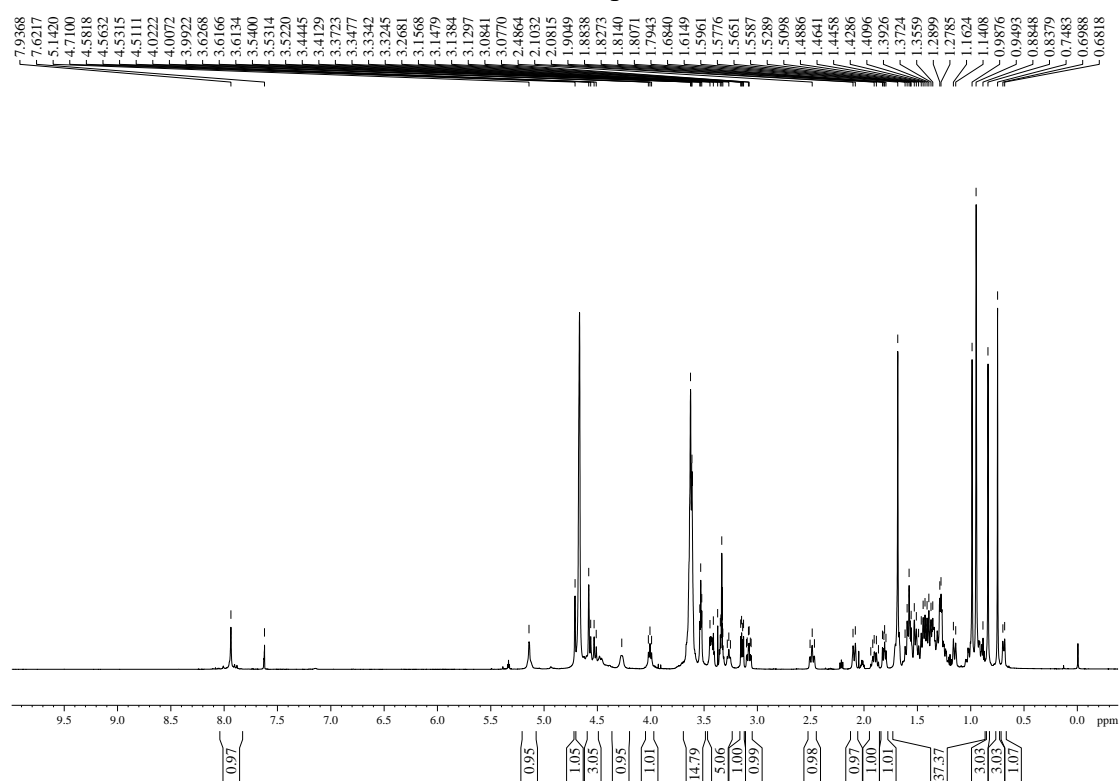

# <sup>13</sup>C NMR of compound 78

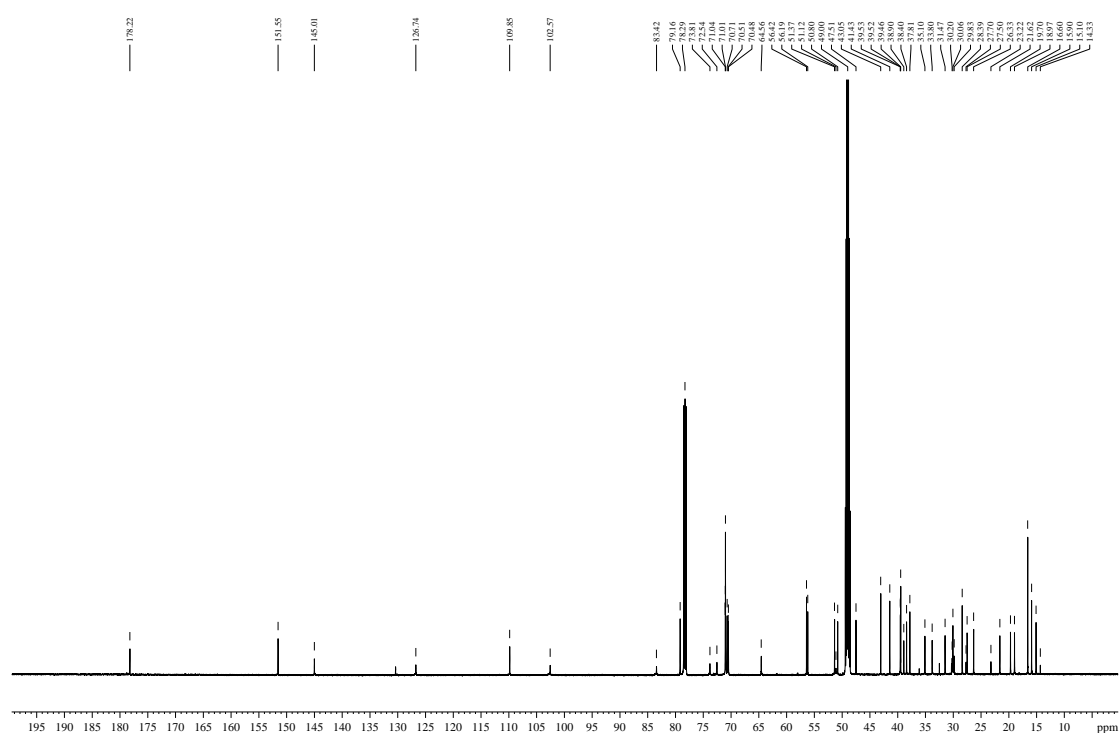

## MALDI-TOF of compound 78

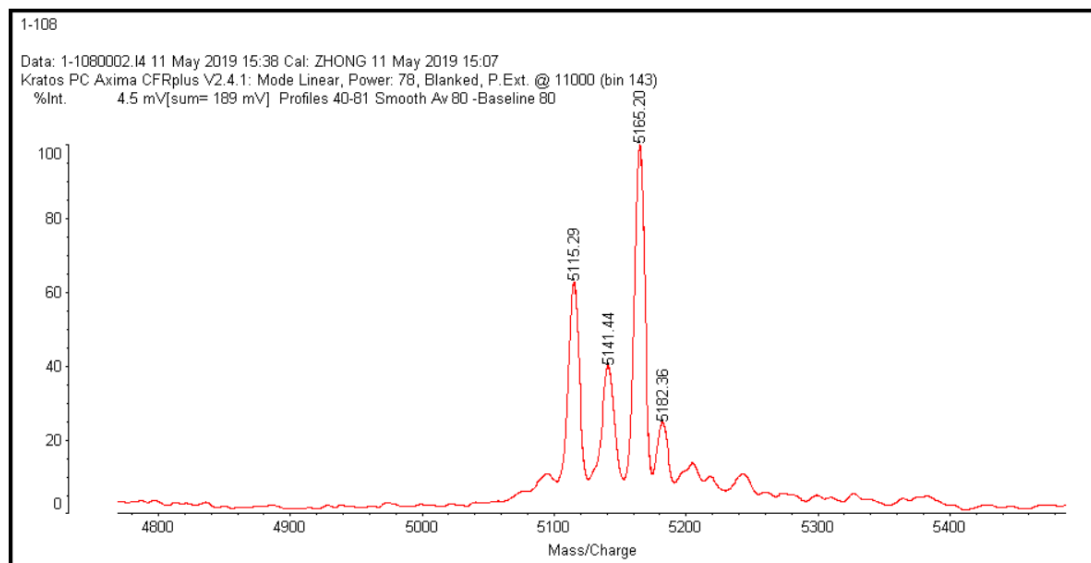

## <sup>1</sup>H NMR of compound 79

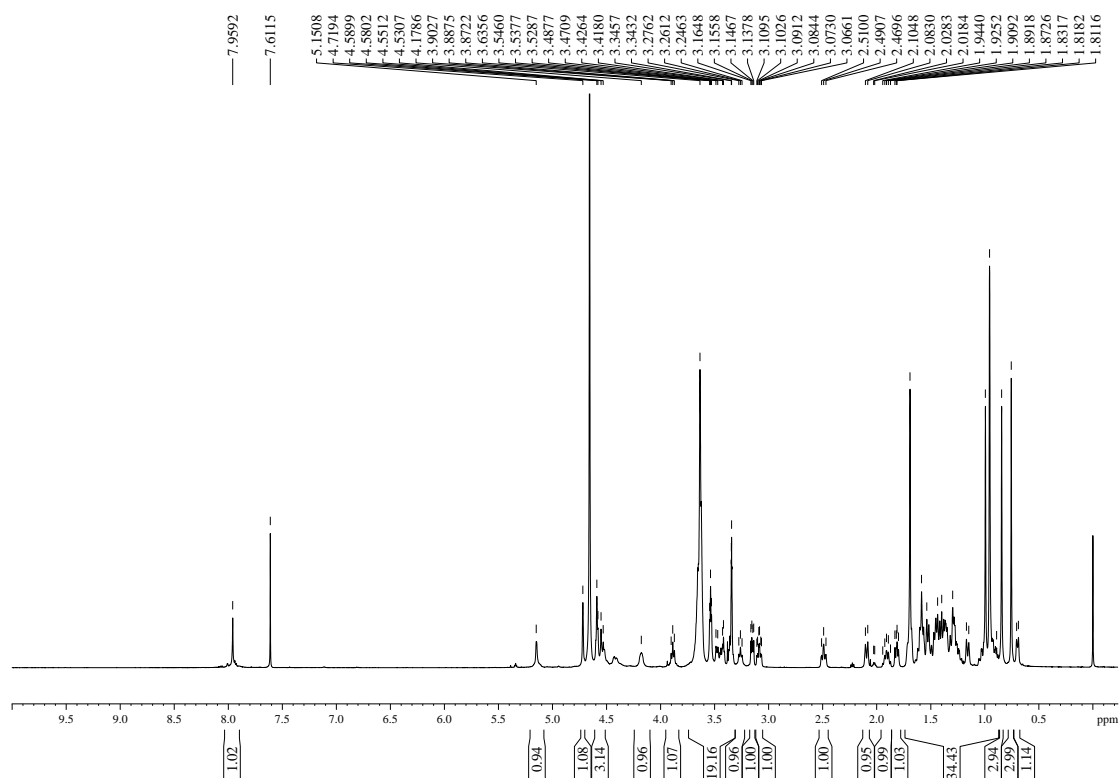

1-110

Data: 1100002.H3 11 May 2019 14:52 Cal: ZHONG 11 May 2019 14:41  
Kratos PC Axima CFRplus V2.4.1: Mode Linear, Power: 77, Blanked, P.Ext. @ 5000 (bin 96)  
%Int. 20 mV[sum= 80 mV] Profiles 1-4 Smooth Av 80 -Baseline 80

Mass/Charge

# <sup>1</sup>H NMR of compound **80**

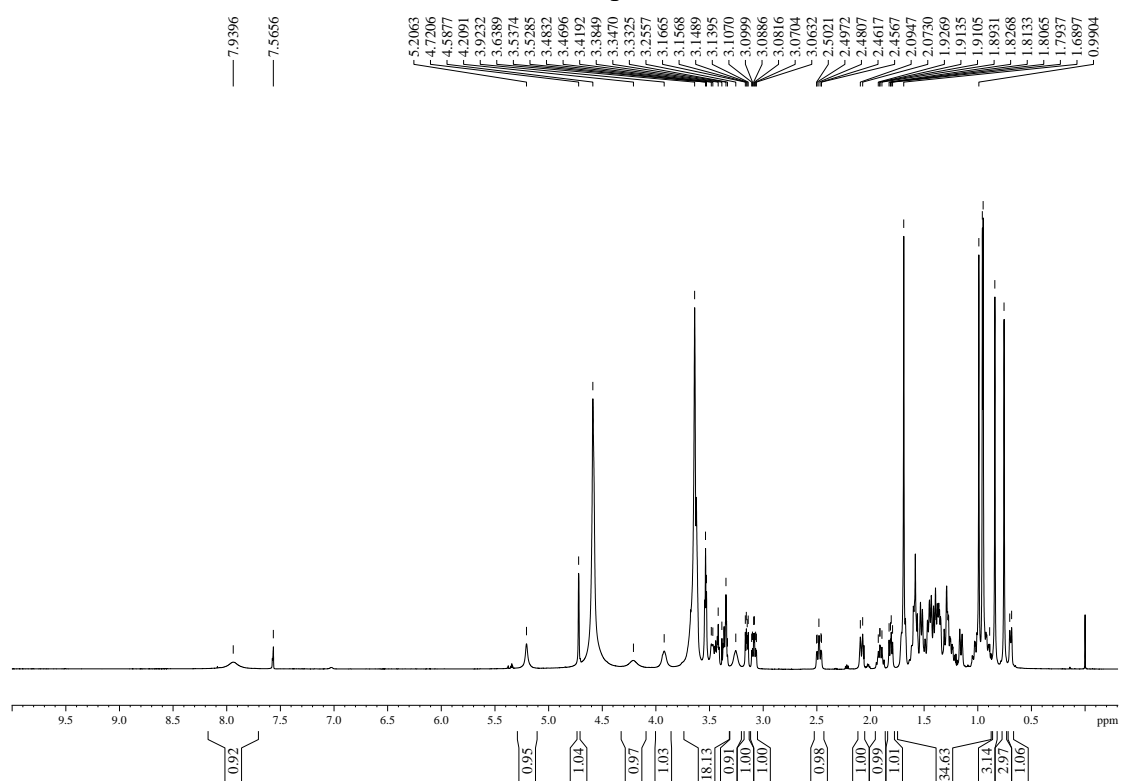

# <sup>13</sup>C NMR of compound **80**

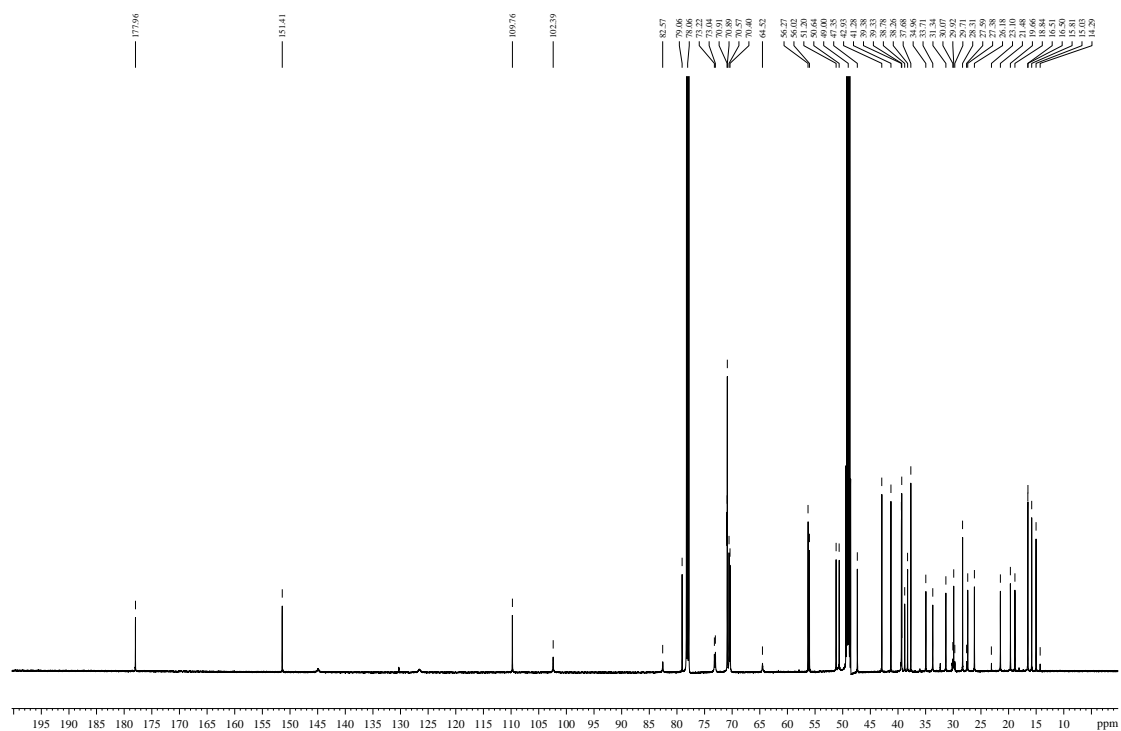

## MALDI-TOF of compound **80**

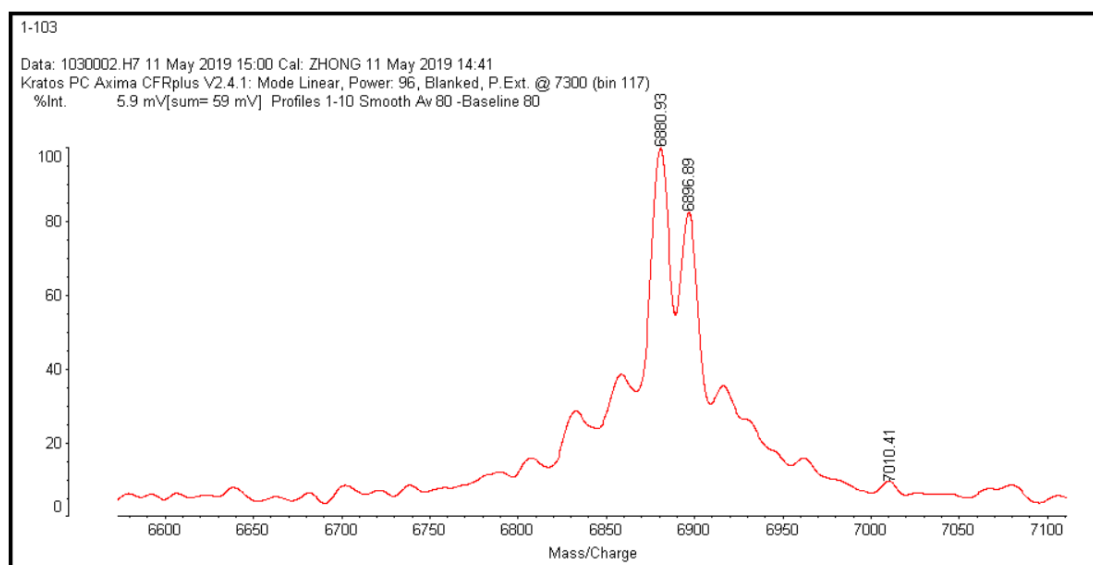

## $^1\text{H}$ NMR of compound **81**

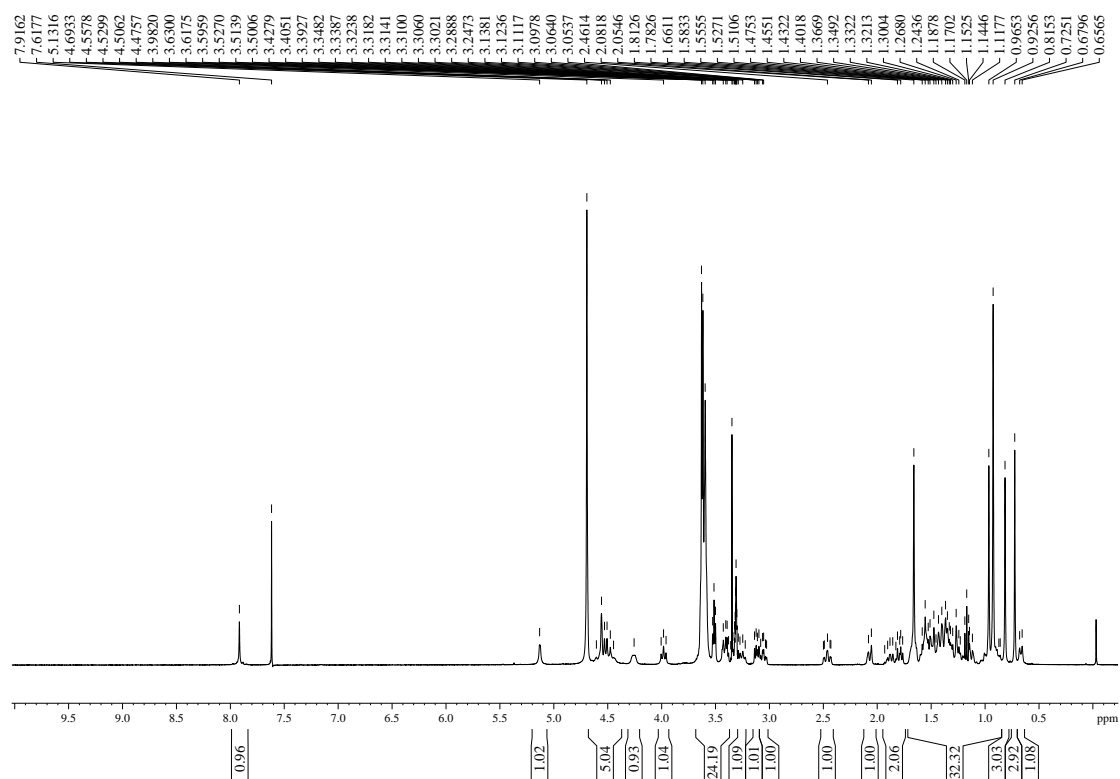

# <sup>13</sup>C NMR of compound **81**

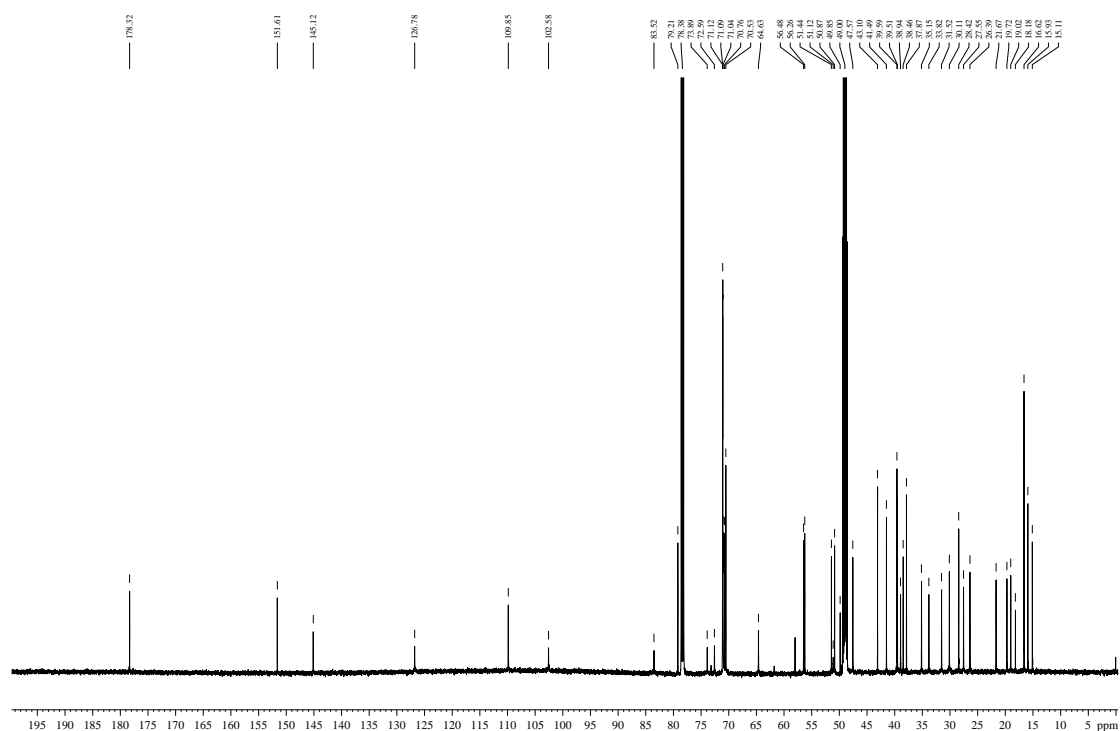

# MALDI-TOF of compound **81**

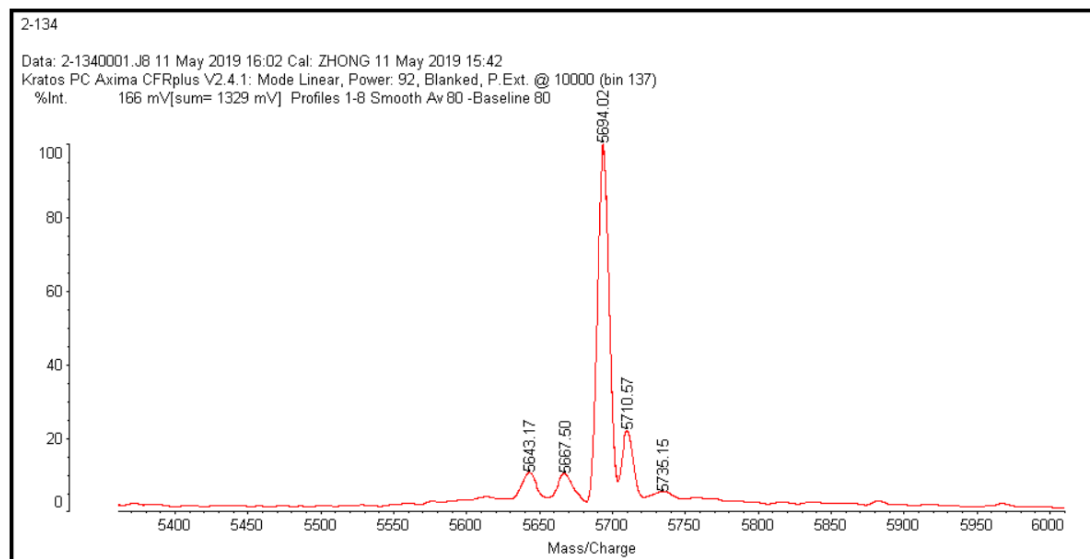

# <sup>1</sup>H NMR of compound **82**

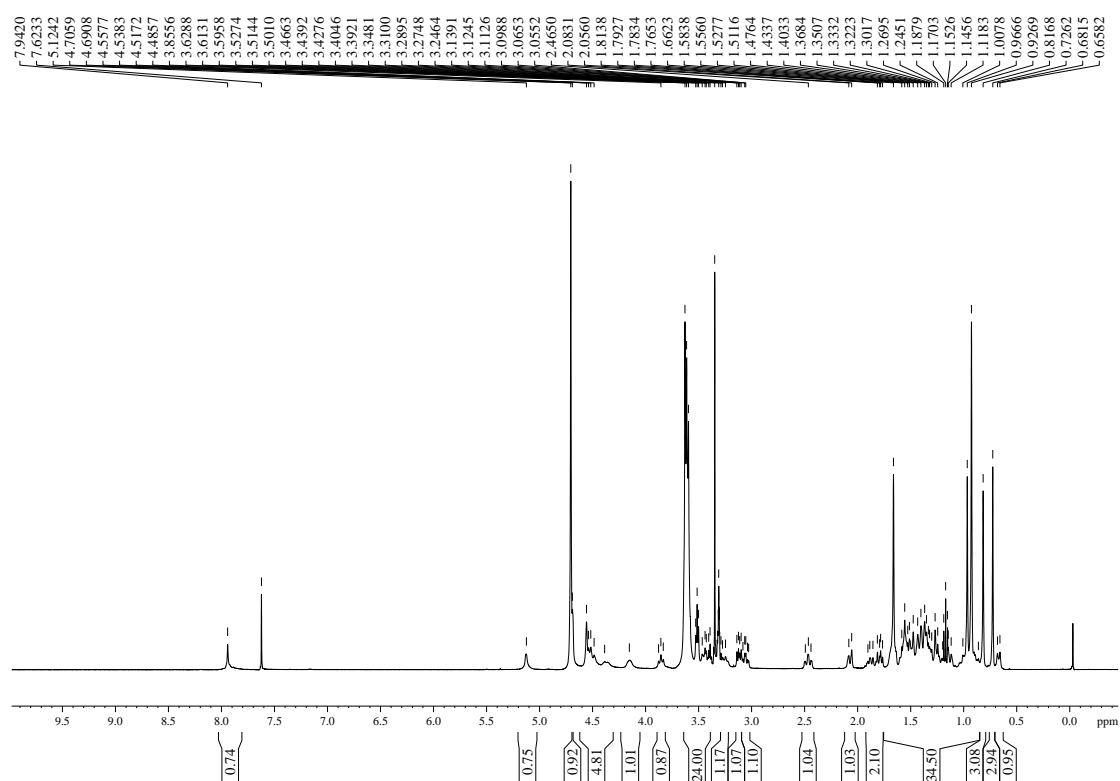

# <sup>13</sup>C NMR of compound **82**

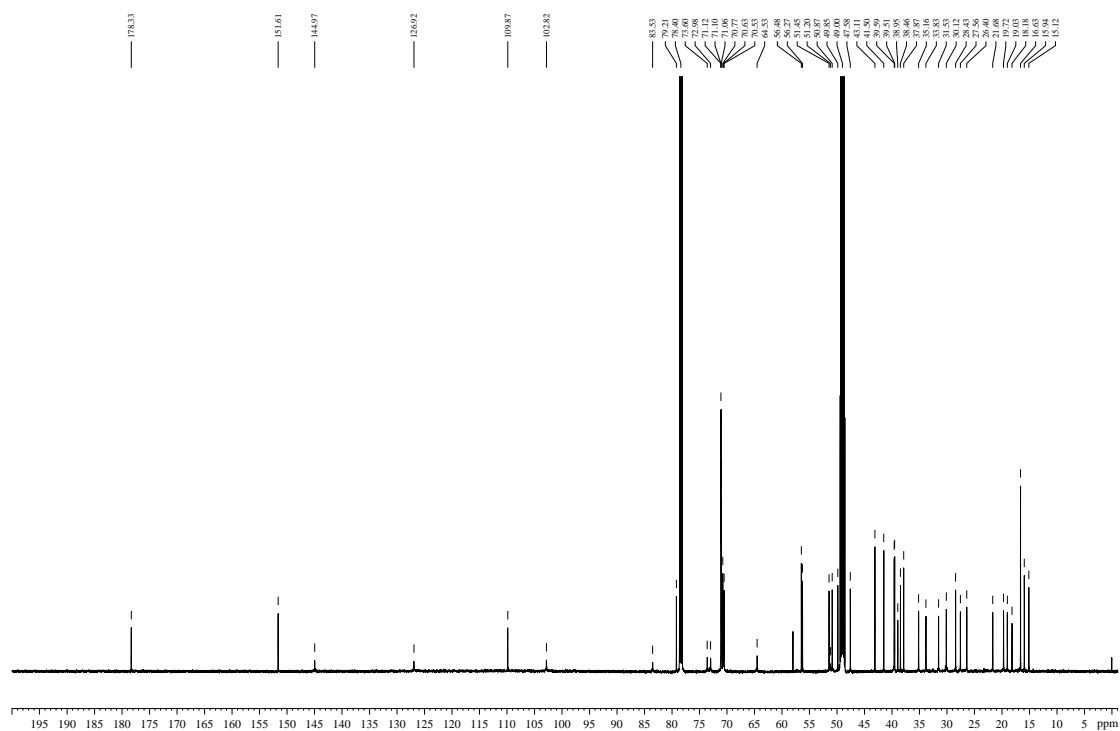

## MALDI-TOF of compound **82**

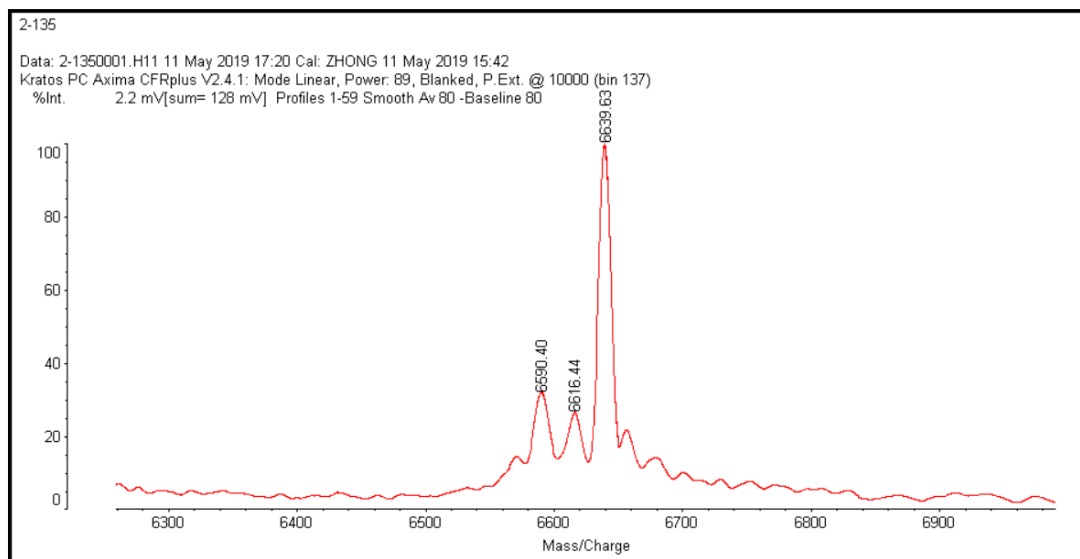

## $^1\text{H}$ NMR of compound **83**

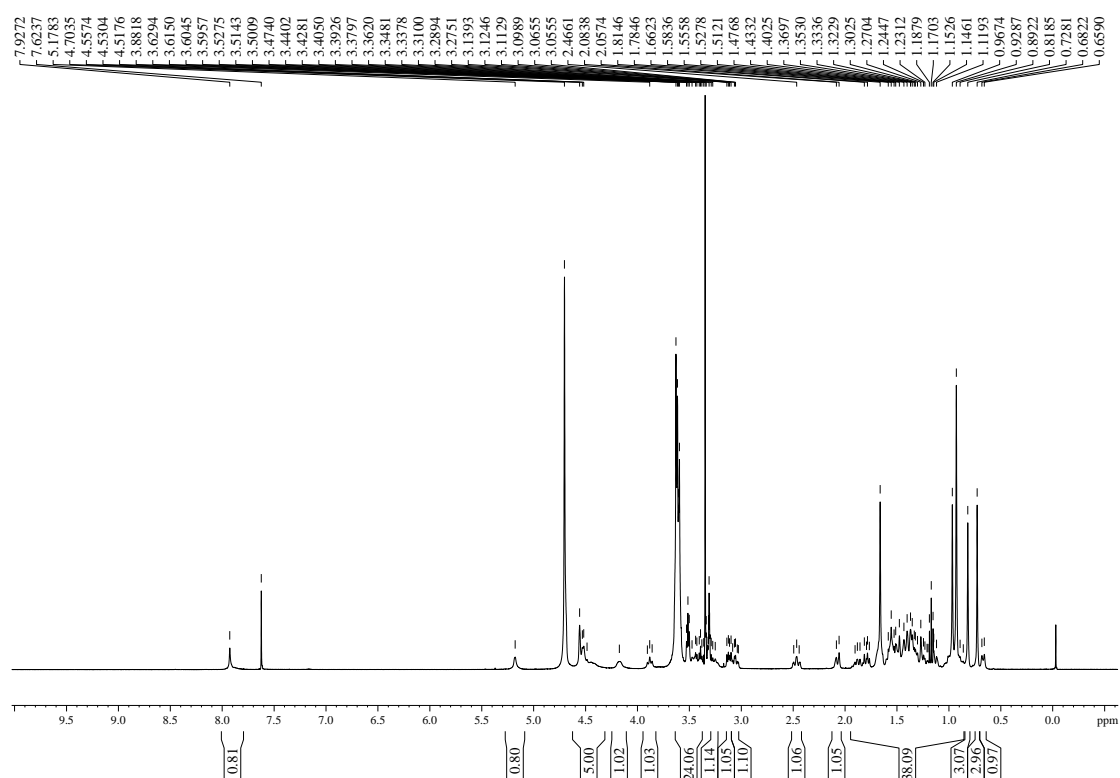

### $^{13}\text{C}$ NMR of compound **83**

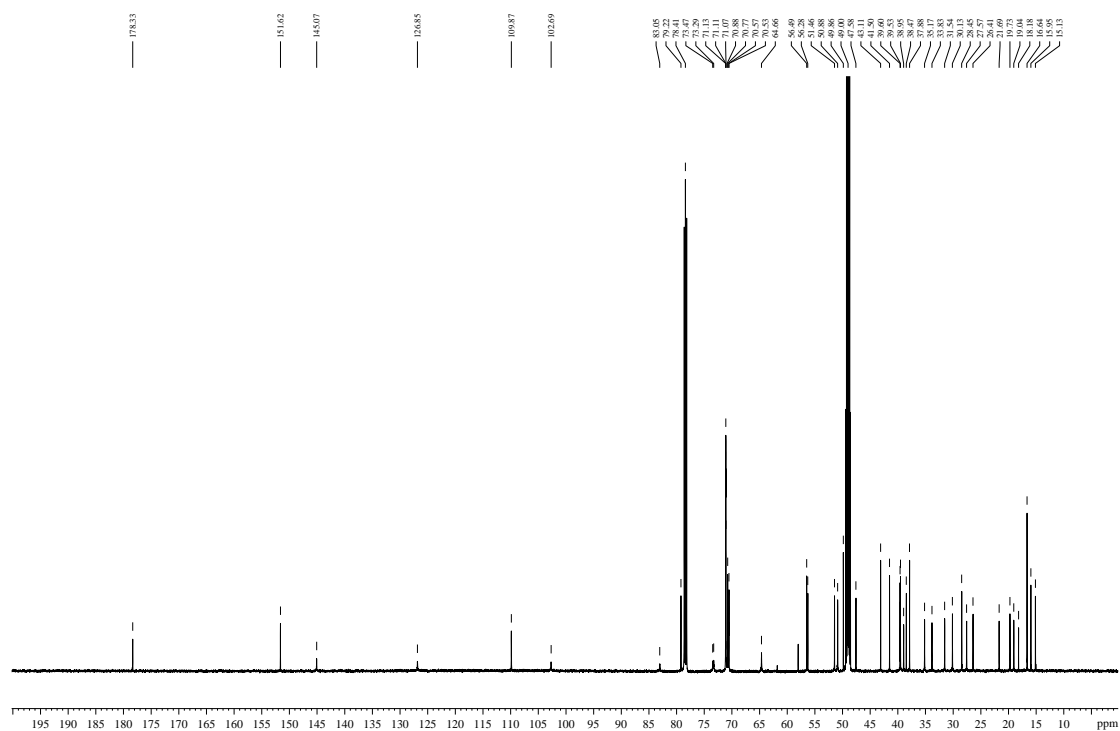

### MALDI-TOF of compound **83**

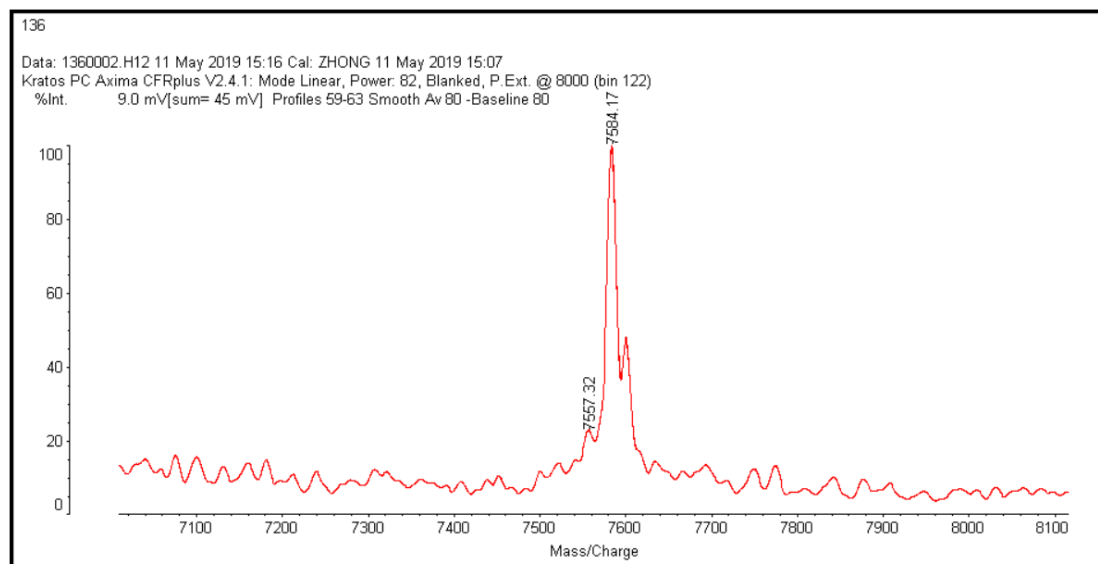

# <sup>1</sup>H NMR of compound 84

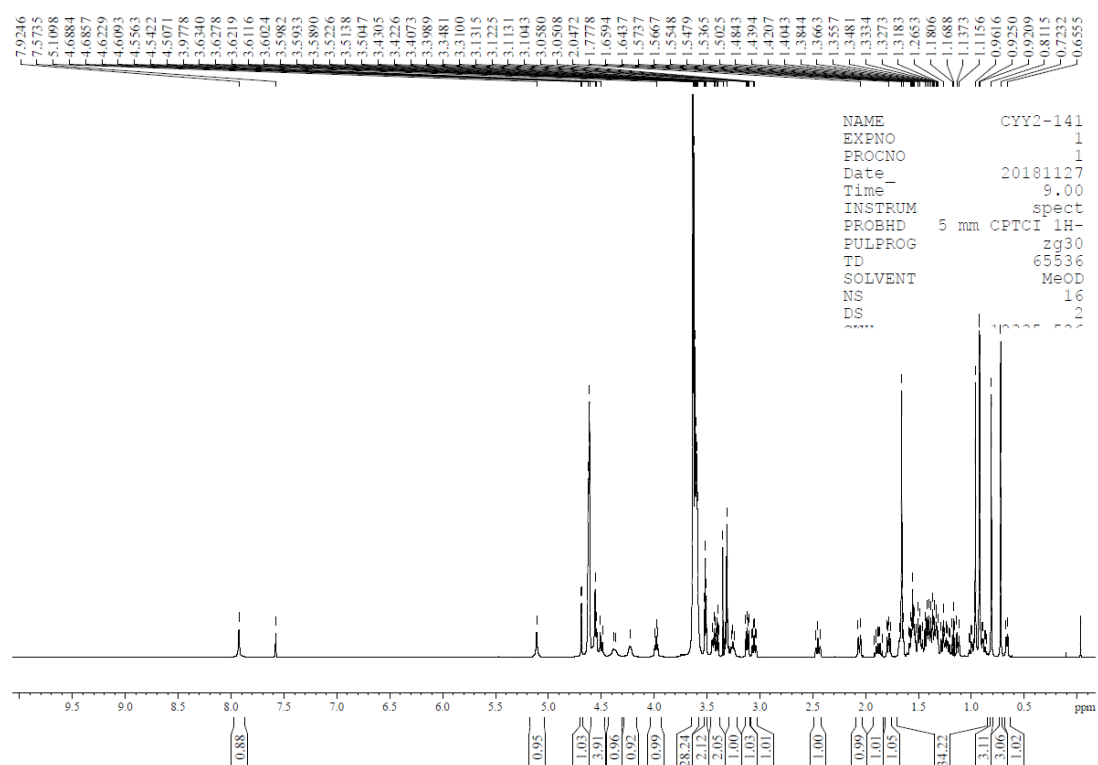

# <sup>13</sup>C NMR of compound 84

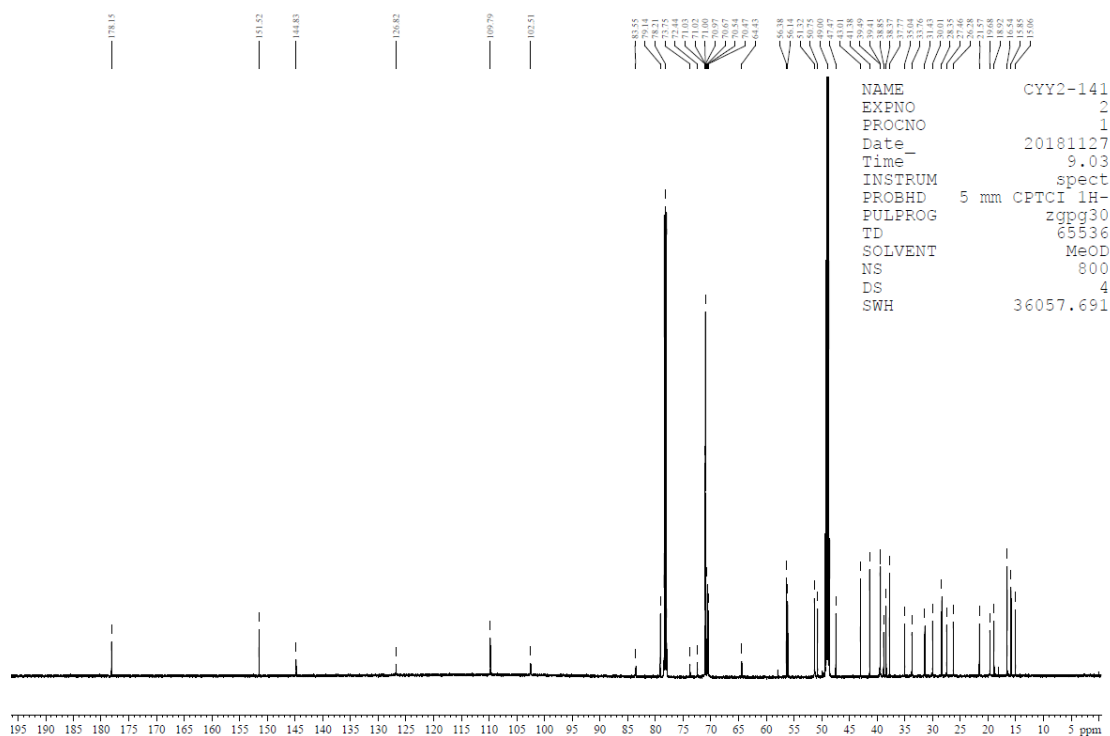

## HRMS of compound **84**

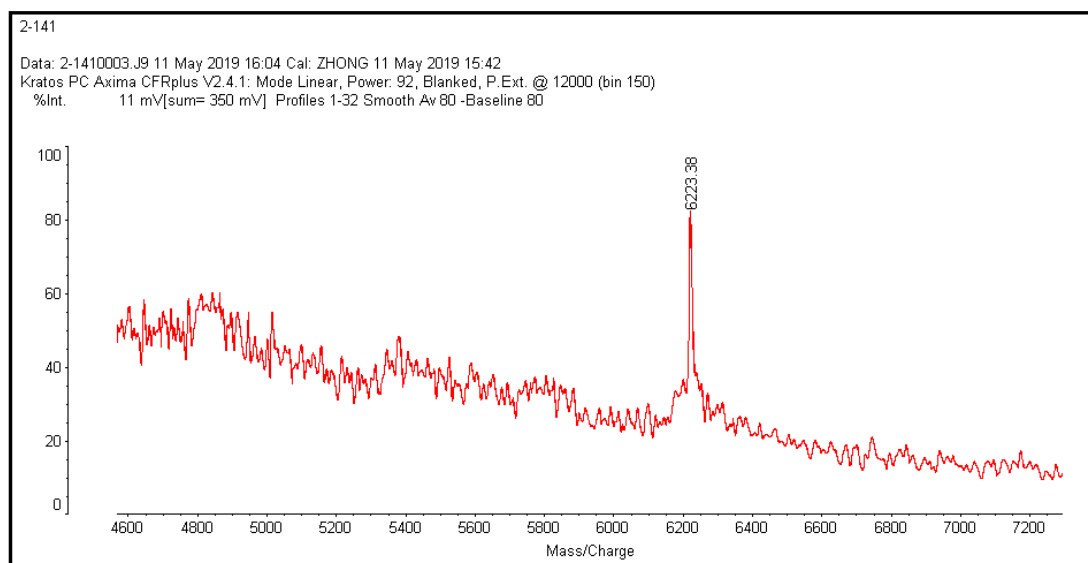

## $^1\text{H}$ NMR of compound **85**

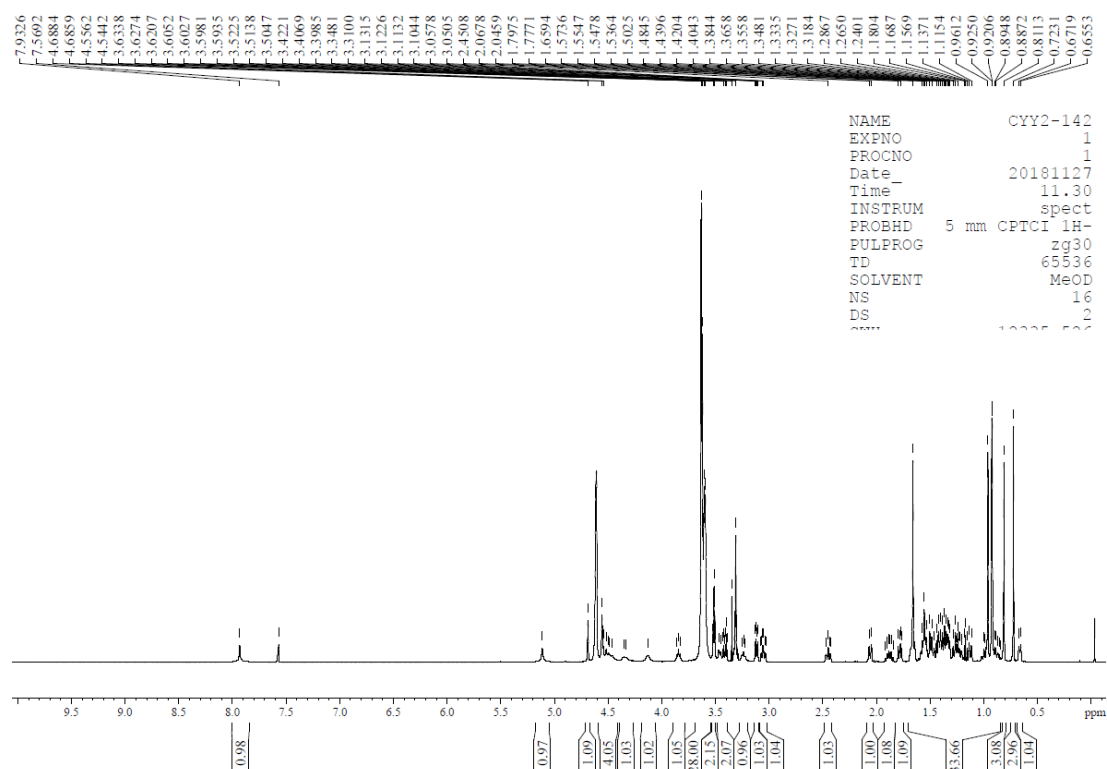

# <sup>13</sup>C NMR of compound **85**

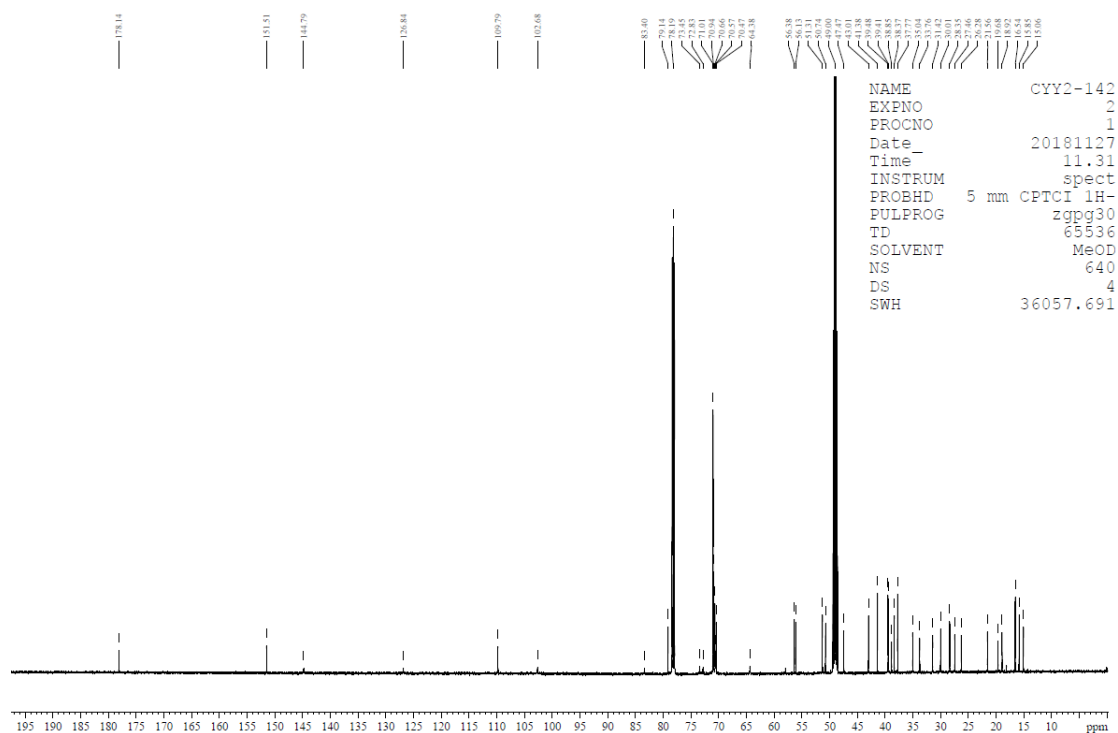

## HRMS of compound **85**

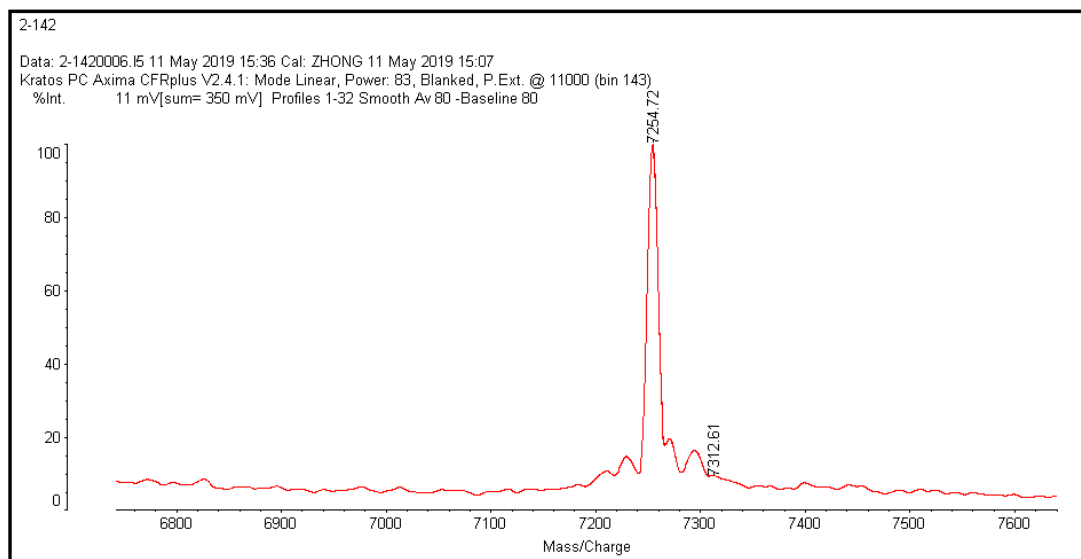

# <sup>1</sup>H NMR of compound **86**

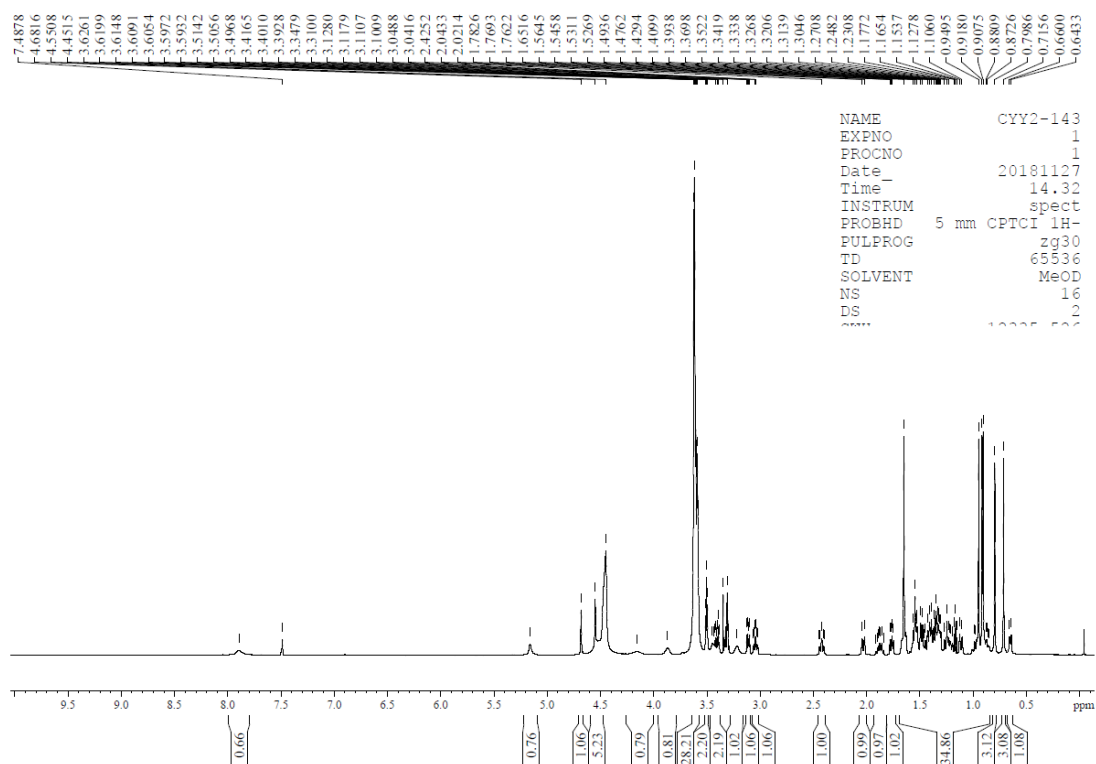

# <sup>13</sup>C NMR of compound **86**

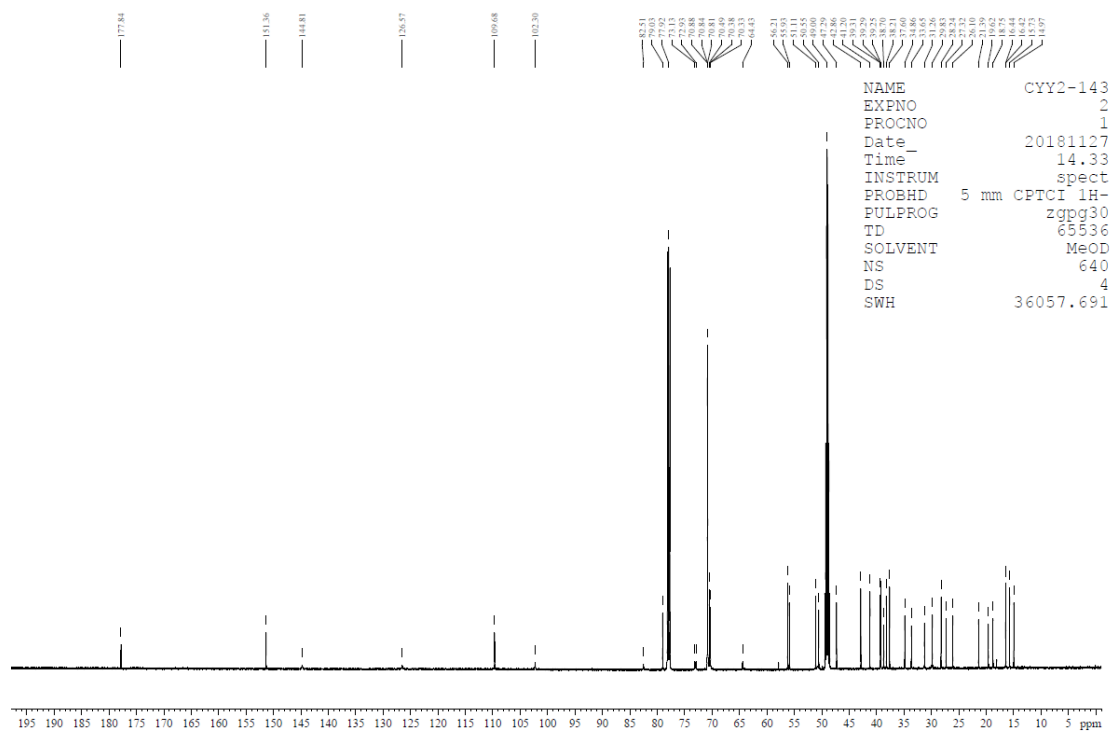

## HRMS of compound **86**

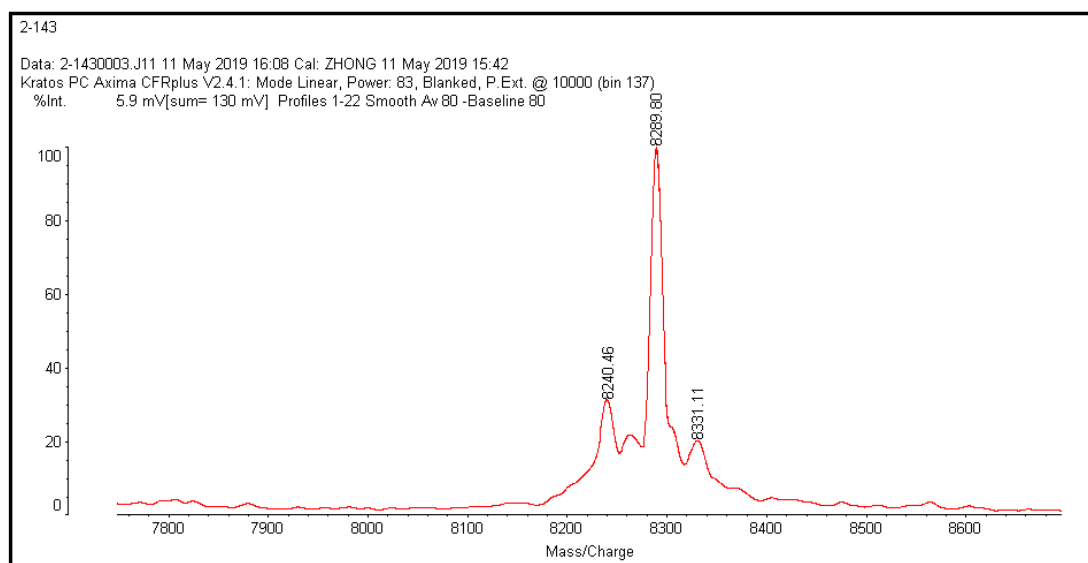

Supplement: s1 [file s1]
